# Supplementary material
Source: MDPI journal article supplement (https://www.mdpi.com/2673-964X/4/1/10)
Supplement: s1 [file s1]

**File S1:** Summary of the dimensions in the DPSIR (Drivers-Pressures-State-Impacts-Responses) analysis, description of the indicators used and compilation of the documentation sources used for each marine area studied. Contains three Tables:

**Table S1.1** DPSIR's dimensions Andalucía (Gulf of Cádiz and Alborán Sea)

**Table S1.2.** DPSIR's dimensions of Asturias

**Table S1.3.** DPSIR's dimensions of Galicia

---

**Table S1.1** DPSIR's dimensions Andalucía.(Gulf of Cádiz and Alborán Sea)

| DPSIR dimension | Class<br>(Integrated<br>indices) | Type                                                        | Indicator                                    | Value<br>dimension | Data source                                                                                                                                                                                                                                                                                                                                                                                                                                                                                                                                                                                                                                                                                                                                                                                                                                                                                                                                                                                                                                                                                                                                         |
|-----------------|----------------------------------|-------------------------------------------------------------|----------------------------------------------|--------------------|-----------------------------------------------------------------------------------------------------------------------------------------------------------------------------------------------------------------------------------------------------------------------------------------------------------------------------------------------------------------------------------------------------------------------------------------------------------------------------------------------------------------------------------------------------------------------------------------------------------------------------------------------------------------------------------------------------------------------------------------------------------------------------------------------------------------------------------------------------------------------------------------------------------------------------------------------------------------------------------------------------------------------------------------------------------------------------------------------------------------------------------------------------|
| 1. Drivers      | Demographic                      | Human population density                                    | Population (n° hab/yr)                       | Societal           | <a href="https://www.juntadeandalucia.es/institutodeestadisticaycartografia/anuario/anuario99/index.htm">https://www.juntadeandalucia.es/institutodeestadisticaycartografia/anuario/anuario99/index.htm</a><br><a href="https://www.ine.es/ss/Satellite?L=es_ES&amp;c=Page&amp;cid=1254735038429&amp;p=1254735038429&amp;pagename=IOEhist%2FIOEhistLayout&amp;param1=1&amp;param2=67000000">https://www.ine.es/ss/Satellite?L=es_ES&amp;c=Page&amp;cid=1254735038429&amp;p=1254735038429&amp;pagename=IOEhist%2FIOEhistLayout&amp;param1=1&amp;param2=67000000</a>                                                                                                                                                                                                                                                                                                                                                                                                                                                                                                                                                                                  |
| 2. Drivers      | Economic                         | Amount of fish consumed by the population                   | Per capita fish consumption (kg/hab)         | Societal           | <a href="https://www.mapa.gob.es/app/consumo-en-hogares/resultado1.asp">https://www.mapa.gob.es/app/consumo-en-hogares/resultado1.asp</a><br><a href="https://www.mapa.gob.es/es/estadistica/temas/publicaciones/anuario-de-estadistica">https://www.mapa.gob.es/es/estadistica/temas/publicaciones/anuario-de-estadistica</a><br><a href="https://www.mapa.gob.es/es/alimentacion/temas/consumo-tendencias/panel-de-consumo-alimentario/series-anuales/">https://www.mapa.gob.es/es/alimentacion/temas/consumo-tendencias/panel-de-consumo-alimentario/series-anuales/</a>                                                                                                                                                                                                                                                                                                                                                                                                                                                                                                                                                                         |
| 3. Drivers      | Economic                         | Amount of money spent by the population on fish consumption | Fish per capita spending (€/hab)             | Societal           | <a href="https://www.mapa.gob.es/app/consumo-en-hogares/resultado1.asp">https://www.mapa.gob.es/app/consumo-en-hogares/resultado1.asp</a><br><a href="https://www.mapa.gob.es/es/estadistica/temas/publicaciones/anuario-de-estadistica">https://www.mapa.gob.es/es/estadistica/temas/publicaciones/anuario-de-estadistica</a><br><a href="https://www.mapa.gob.es/es/alimentacion/temas/consumo-tendencias/panel-de-consumo-alimentario/series-anuales/">https://www.mapa.gob.es/es/alimentacion/temas/consumo-tendencias/panel-de-consumo-alimentario/series-anuales/</a>                                                                                                                                                                                                                                                                                                                                                                                                                                                                                                                                                                         |
| 4. Drivers      | Cultural                         | Institutional promotion of fish consumption                 | n° advertisements promoting fish consumption | Societal           | <a href="http://www.alimentacion.es/es/campanas/pescados/">http://www.alimentacion.es/es/campanas/pescados/</a><br><a href="https://www.juntadeandalucia.es/export/drupaljda/HISTORICO_WEB.pdf">https://www.juntadeandalucia.es/export/drupaljda/HISTORICO_WEB.pdf</a><br><a href="https://www.juntadeandalucia.es/organismos/agriculturaganaderiapescaaydesarrollosostenible/areas/pesca-acuicultura/comercializacion/paginas/informe-promocion.html">https://www.juntadeandalucia.es/organismos/agriculturaganaderiapescaaydesarrollosostenible/areas/pesca-acuicultura/comercializacion/paginas/informe-promocion.html</a><br><a href="https://www.alimentosdespana.es/es/campanas/ultimas-campanas/pescados-moluscos-crustaceos/pescados/default.aspx">https://www.alimentosdespana.es/es/campanas/ultimas-campanas/pescados-moluscos-crustaceos/pescados/default.aspx</a><br><a href="https://www.alimentosdespana.es/es/campanas/ultimas-campanas/alimentos-de-espana/campana-alimentos-de-espana/default.aspx">https://www.alimentosdespana.es/es/campanas/ultimas-campanas/alimentos-de-espana/campana-alimentos-de-espana/default.aspx</a> |
| 5. Pressures    | Overexploitation                 | Development of Industrial fishing gear                      | n° industrial vessels                        | Societal           | <a href="http://www.juntadeandalucia.es/organismos/agriculturapescaaydesarrollorural/consejeria/sobre-consejeria/estadisticas/paginas/pesqueras-pub.html">http://www.juntadeandalucia.es/organismos/agriculturapescaaydesarrollorural/consejeria/sobre-consejeria/estadisticas/paginas/pesqueras-pub.html</a><br><a href="https://www.mapama.gob.es/es/pesca/temas/">https://www.mapama.gob.es/es/pesca/temas/</a><br><a href="https://www.ige.eu/web/mostrar_actividade_estadistica.jsp?idioma=gl&amp;codigo=0301004">https://www.ige.eu/web/mostrar_actividade_estadistica.jsp?idioma=gl&amp;codigo=0301004</a>                                                                                                                                                                                                                                                                                                                                                                                                                                                                                                                                   |
| 6. Pressures    | Overexploitation                 | Development of Industrial fishing gear                      | Gross tonnage of industrial vessels          | Societal           | <a href="http://www.juntadeandalucia.es/organismos/agriculturapescaaydesarrollorural/consejeria/sobre-consejeria/estadisticas/paginas/pesqueras-pub.html">http://www.juntadeandalucia.es/organismos/agriculturapescaaydesarrollorural/consejeria/sobre-consejeria/estadisticas/paginas/pesqueras-pub.html</a>                                                                                                                                                                                                                                                                                                                                                                                                                                                                                                                                                                                                                                                                                                                                                                                                                                       |

| DPSIR dimension | Class<br>(Integrated<br>indices) | Type                                   | Indicator                                                                                      | Value<br>dimension | Data source                                                                                                                                                                                                                                                                                                                                                                                                                                                                                                                                                                                                     |
|-----------------|----------------------------------|----------------------------------------|------------------------------------------------------------------------------------------------|--------------------|-----------------------------------------------------------------------------------------------------------------------------------------------------------------------------------------------------------------------------------------------------------------------------------------------------------------------------------------------------------------------------------------------------------------------------------------------------------------------------------------------------------------------------------------------------------------------------------------------------------------|
|                 |                                  |                                        |                                                                                                |                    | <a href="https://www.mapama.gob.es/es/pesca/temas/">https://www.mapama.gob.es/es/pesca/temas/</a><br><a href="https://www.ige.eu/web/mostrar_actividade_estadistica.jsp?idioma=gI&amp;codigo=0301004">https://www.ige.eu/web/mostrar_actividade_estadistica.jsp?idioma=gI&amp;codigo=0301004</a>                                                                                                                                                                                                                                                                                                                |
| 7. Pressures    | Overexploitation                 | Development of Industrial fishing gear | Total power of industrial fisheries vessels (kW)                                               | Societal           | <a href="http://www.juntadeandalucia.es/organismos/agriculturapescaydesarrollorural/consejeria/sobre-consejeria/estadisticas/paginas/pesqueras-pub.html">http://www.juntadeandalucia.es/organismos/agriculturapescaydesarrollorural/consejeria/sobre-consejeria/estadisticas/paginas/pesqueras-pub.html</a><br><a href="https://www.mapama.gob.es/es/pesca/temas/">https://www.mapama.gob.es/es/pesca/temas/</a><br><a href="https://www.ige.eu/web/mostrar_actividade_estadistica.jsp?idioma=gI&amp;codigo=0301004">https://www.ige.eu/web/mostrar_actividade_estadistica.jsp?idioma=gI&amp;codigo=0301004</a> |
| 8. Pressures    | Land use change                  | Transformation of coastal ecosystem    | N° of harbours                                                                                 | Societal           | <a href="http://www.feapdt.es/en/documentos-tecnicos">www.feapdt.es/en/documentos-tecnicos</a><br><a href="https://www.puertosdeandalucia.es/es/sistema-portuario-andaluz">https://www.puertosdeandalucia.es/es/sistema-portuario-andaluz</a>                                                                                                                                                                                                                                                                                                                                                                   |
| 9. State        | Biodiversity loss                | Exploited marine biodiversity          | Number of captured bony fish species                                                           | Biodiversity       | <a href="http://www.juntadeandalucia.es/organismos/agriculturapescaydesarrollorural/consejeria/sobre-consejeria/estadisticas/paginas/pesqueras-pub.html">http://www.juntadeandalucia.es/organismos/agriculturapescaydesarrollorural/consejeria/sobre-consejeria/estadisticas/paginas/pesqueras-pub.html</a><br><a href="https://www.mapama.gob.es/es/pesca/temas/">https://www.mapama.gob.es/es/pesca/temas/</a>                                                                                                                                                                                                |
| 10. State       | Biodiversity loss                | Exploited marine biodiversity          | Number of captured cartilaginous fish species                                                  | Biodiversity       | <a href="http://www.juntadeandalucia.es/organismos/agriculturapescaydesarrollorural/consejeria/sobre-consejeria/estadisticas/paginas/pesqueras-pub.html">http://www.juntadeandalucia.es/organismos/agriculturapescaydesarrollorural/consejeria/sobre-consejeria/estadisticas/paginas/pesqueras-pub.html</a><br><a href="https://www.mapama.gob.es/es/pesca/temas/">https://www.mapama.gob.es/es/pesca/temas/</a>                                                                                                                                                                                                |
| 11. State       | Biodiversity loss                | Exploited marine biodiversity          | Number of captured mollusc species                                                             | Biodiversity       | <a href="http://www.juntadeandalucia.es/organismos/agriculturapescaydesarrollorural/consejeria/sobre-consejeria/estadisticas/paginas/pesqueras-pub.html">http://www.juntadeandalucia.es/organismos/agriculturapescaydesarrollorural/consejeria/sobre-consejeria/estadisticas/paginas/pesqueras-pub.html</a><br><a href="https://www.mapama.gob.es/es/pesca/temas/">https://www.mapama.gob.es/es/pesca/temas/</a>                                                                                                                                                                                                |
| 12. State       | Biodiversity loss                | Exploited marine biodiversity          | Number of captured crustacean species                                                          | Biodiversity       | <a href="http://www.juntadeandalucia.es/organismos/agriculturapescaydesarrollorural/consejeria/sobre-consejeria/estadisticas/paginas/pesqueras-pub.html">http://www.juntadeandalucia.es/organismos/agriculturapescaydesarrollorural/consejeria/sobre-consejeria/estadisticas/paginas/pesqueras-pub.html</a><br><a href="https://www.mapama.gob.es/es/pesca/temas/">https://www.mapama.gob.es/es/pesca/temas/</a>                                                                                                                                                                                                |
| 13. State       | Biodiversity loss                | Jeopardized biodiversity               | Changes in Conservation IUCN threatened categories (NT, VU, EN, and CR). Only captured species | Biodiversity       | <a href="http://www.iucnredlist.org/">http://www.iucnredlist.org/</a><br><br>Sólo en Alborán Sea:<br><a href="http://www.iucnredlist.org/initiatives/mediterranean">http://www.iucnredlist.org/initiatives/mediterranean</a>                                                                                                                                                                                                                                                                                                                                                                                    |
| 14. State       | Biodiversity loss                | Jeopardized biodiversity               | Changes in Conservation IUCN threatened categories (NT, VU, EN, and CR). Seabirds              | Biodiversity       | <a href="http://www.iucnredlist.org/">http://www.iucnredlist.org/</a><br><br>Sólo en Alborán Sea:<br><a href="http://www.iucnredlist.org/initiatives/mediterranean">http://www.iucnredlist.org/initiatives/mediterranean</a>                                                                                                                                                                                                                                                                                                                                                                                    |
| 15. State       | Biodiversity loss                | Jeopardized biodiversity               | Changes in Conservation IUCN                                                                   | Biodiversity       | <a href="http://www.iucnredlist.org/">http://www.iucnredlist.org/</a>                                                                                                                                                                                                                                                                                                                                                                                                                                                                                                                                           |

| DPSIR dimension | Class<br>(Integrated indices)  | Type                                                                                                             | Indicator                                                                                          | Value dimension           | Data source                                                                                                                                                                                                                                                                                                                                                                                                                                                                                                                                                                                                          |
|-----------------|--------------------------------|------------------------------------------------------------------------------------------------------------------|----------------------------------------------------------------------------------------------------|---------------------------|----------------------------------------------------------------------------------------------------------------------------------------------------------------------------------------------------------------------------------------------------------------------------------------------------------------------------------------------------------------------------------------------------------------------------------------------------------------------------------------------------------------------------------------------------------------------------------------------------------------------|
|                 |                                |                                                                                                                  | threatened categories (NT, VU, EN, and CR).<br>Cetaceans and turtles                               |                           | Sólo en Alborán Sea:<br><a href="http://www.iucnredlist.org/initiatives/mediterranean">http://www.iucnredlist.org/initiatives/mediterranean</a>                                                                                                                                                                                                                                                                                                                                                                                                                                                                      |
| 16. State       | Biodiversity loss              | Jeopardized biodiversity                                                                                         | Changes in seabird Conservation categories (Spanish Catalogue of threatened species).<br>Seabirds  | Biodiversity              | <a href="http://www.birdlife.org/">http://www.birdlife.org/</a><br><a href="http://ec.europa.eu/environment/nature/legislation/birdsdirective/index_en.htm">http://ec.europa.eu/environment/nature/legislation/birdsdirective/index_en.htm</a><br>BOE-A-2011-3582<br><a href="https://www.mapama.gob.es/es/Biodiversity/servicios/banco-datos-naturaleza/informacion-disponible/libro_rojo_vertebrados.aspx">https://www.mapama.gob.es/es/Biodiversity/servicios/banco-datos-naturaleza/informacion-disponible/libro_rojo_vertebrados.aspx</a>                                                                       |
| 17. State       | Biodiversity loss              | Jeopardized biodiversity                                                                                         | Changes in sea turtle Conservation categories (Spanish Catalogue of protected species).<br>Turtles | Biodiversity              | BOE-A-2011-3582<br><a href="https://www.mapama.gob.es/es/Biodiversity/servicios/banco-datos-naturaleza/informacion-disponible/libro_rojo_vertebrados.aspx">https://www.mapama.gob.es/es/Biodiversity/servicios/banco-datos-naturaleza/informacion-disponible/libro_rojo_vertebrados.aspx</a>                                                                                                                                                                                                                                                                                                                         |
| 18. State       | Biodiversity loss              | Jeopardized biodiversity                                                                                         | Changes in cetacean Conservation categories (Andalusian Red List of Seabirds)                      | Biodiversity              | <a href="https://www.juntadeandalucia.es/medioambiente/portal_web/web/servicios/centro_de_documentacion_y_biblioteca/fondo_editorial_digital/documentos_tecnicos/Libro_rojo_vertebrados/documento_completo.pdf">https://www.juntadeandalucia.es/medioambiente/portal_web/web/servicios/centro_de_documentacion_y_biblioteca/fondo_editorial_digital/documentos_tecnicos/Libro_rojo_vertebrados/documento_completo.pdf</a><br><a href="https://digital.csic.es/bitstream/10261/60546/1/LR_completo_para_web_tcm7-164856.pdf">https://digital.csic.es/bitstream/10261/60546/1/LR_completo_para_web_tcm7-164856.pdf</a> |
| 19. State       | Biodiversity loss              | Jeopardized biodiversity                                                                                         | Changes in cetacean Conservation categories (Andalusian Red List of Cetaceans)                     | Biodiversity              | <a href="https://www.juntadeandalucia.es/medioambiente/portal_web/web/servicios/centro_de_documentacion_y_biblioteca/fondo_editorial_digital/documentos_tecnicos/Libro_rojo_vertebrados/documento_completo.pdf">https://www.juntadeandalucia.es/medioambiente/portal_web/web/servicios/centro_de_documentacion_y_biblioteca/fondo_editorial_digital/documentos_tecnicos/Libro_rojo_vertebrados/documento_completo.pdf</a>                                                                                                                                                                                            |
| 20. Impacts     | Provisioning Ecosystem service | Animals for food. Evolution of total biomass of fisheries, including fish and shellfish species, expressed in kg | Total fisheries biomass for all groups (kg)                                                        | Material                  | <a href="http://www.juntadeandalucia.es/organismos/agriculturapescaydesarrollorural/consejeria/sobre-consejeria/estadisticas/paginas/pesqueras-pub.html">http://www.juntadeandalucia.es/organismos/agriculturapescaydesarrollorural/consejeria/sobre-consejeria/estadisticas/paginas/pesqueras-pub.html</a><br><a href="https://www.mapama.gob.es/es/pesca/temas/">https://www.mapama.gob.es/es/pesca/temas/</a>                                                                                                                                                                                                     |
| 21. Impacts     | Cultural ecosystem service     | Number of Fish producer, fishermen and business associations                                                     | Evolution of the number of professional fishermen organizations                                    | Good social relationships | <a href="http://www.juntadeandalucia.es/agriculturaypesca/bitacora/directorio/asociaciones/huelva.html">http://www.juntadeandalucia.es/agriculturaypesca/bitacora/directorio/asociaciones/huelva.html</a><br><a href="http://www.juntadeandalucia.es/agriculturaypesca/bitacora/directorio/asociaciones/cadiz.html">http://www.juntadeandalucia.es/agriculturaypesca/bitacora/directorio/asociaciones/cadiz.html</a>                                                                                                                                                                                                 |

| DPSIR dimension | Class<br>(Integrated indices) | Type                                                   | Indicator                                                                              | Value dimension                   | Data source                                                                                                                                                                                                                                                                                                                                                                                                                                                                                                                                                                                                       |
|-----------------|-------------------------------|--------------------------------------------------------|----------------------------------------------------------------------------------------|-----------------------------------|-------------------------------------------------------------------------------------------------------------------------------------------------------------------------------------------------------------------------------------------------------------------------------------------------------------------------------------------------------------------------------------------------------------------------------------------------------------------------------------------------------------------------------------------------------------------------------------------------------------------|
|                 |                               | representative of the fisheries and aquaculture sector |                                                                                        |                                   | <a href="http://www.juntadeandalucia.es/agriculturaypesca/bitacora/directorio/asociaciones/almeria.html">http://www.juntadeandalucia.es/agriculturaypesca/bitacora/directorio/asociaciones/almeria.html</a><br><a href="http://www.juntadeandalucia.es/agriculturaypesca/bitacora/directorio/asociaciones/granada.html">http://www.juntadeandalucia.es/agriculturaypesca/bitacora/directorio/asociaciones/granada.html</a><br><a href="http://www.juntadeandalucia.es/export/drupaljda/Cofradias-pescadores-Andalucia.pdf">http://www.juntadeandalucia.es/export/drupaljda/Cofradias-pescadores-Andalucia.pdf</a> |
| 22. Impacts     | Cultural ecosystem service    | Development of Artisanal fishing gear                  | n° artisanal vessels                                                                   | Societal                          | <a href="http://www.juntadeandalucia.es/organismos/agriculturapescaydesarrollorural/consejeria/sobre-consejeria/estadisticas/paginas/pesqueras-pub.html">http://www.juntadeandalucia.es/organismos/agriculturapescaydesarrollorural/consejeria/sobre-consejeria/estadisticas/paginas/pesqueras-pub.html</a><br><a href="https://www.mapama.gob.es/es/pesca/temas/">https://www.mapama.gob.es/es/pesca/temas/</a><br><a href="https://www.ige.eu/web/mostrar_actividade_estadistica.jsp?idioma=gI&amp;codigo=0301004">https://www.ige.eu/web/mostrar_actividade_estadistica.jsp?idioma=gI&amp;codigo=0301004</a>   |
| 23. Impacts     | Cultural ecosystem service    | Development of Artisanal fishing gear                  | Gross tonnage of artisanal vessels                                                     | Societal                          | <a href="http://www.juntadeandalucia.es/organismos/agriculturapescaydesarrollorural/consejeria/sobre-consejeria/estadisticas/paginas/pesqueras-pub.html">http://www.juntadeandalucia.es/organismos/agriculturapescaydesarrollorural/consejeria/sobre-consejeria/estadisticas/paginas/pesqueras-pub.html</a><br><a href="https://www.mapama.gob.es/es/pesca/temas/">https://www.mapama.gob.es/es/pesca/temas/</a><br><a href="https://www.ige.eu/web/mostrar_actividade_estadistica.jsp?idioma=gI&amp;codigo=0301004">https://www.ige.eu/web/mostrar_actividade_estadistica.jsp?idioma=gI&amp;codigo=0301004</a>   |
| 24. Impacts     | Cultural ecosystem service    | Development of Artisanal fishing gear                  | Total power of artisanal fisheries vessels (kW)                                        | Societal                          | <a href="http://www.juntadeandalucia.es/organismos/agriculturapescaydesarrollorural/consejeria/sobre-consejeria/estadisticas/paginas/pesqueras-pub.html">http://www.juntadeandalucia.es/organismos/agriculturapescaydesarrollorural/consejeria/sobre-consejeria/estadisticas/paginas/pesqueras-pub.html</a><br><a href="https://www.mapama.gob.es/es/pesca/temas/">https://www.mapama.gob.es/es/pesca/temas/</a><br><a href="https://www.ige.eu/web/mostrar_actividade_estadistica.jsp?idioma=gI&amp;codigo=0301004">https://www.ige.eu/web/mostrar_actividade_estadistica.jsp?idioma=gI&amp;codigo=0301004</a>   |
| 25. Impacts     | Regulating ecosystem service  | Biological control of marine food web integrity        | Marine Trophic Index (MTI).                                                            | Ecosystem and habitat maintenance | <a href="#">INDEX, M. T. (2004). Convention on biological diversity. Science, 279, 860-863.</a><br><a href="#">Mace, G., Delbaere, B., &amp; Hanski, I. (2005). A user's guide to biodiversity indicators. European Academy of Sciences Advisory Council (<a href="http://www.easac.org/EASACBioindicator.pdf">http://www.easac.org/EASACBioindicator.pdf</a>).</a>                                                                                                                                                                                                                                               |
| 26. Impacts     | Regulating ecosystem service  | Biological control of marine food web integrity        | Primary productivity required (PPR)                                                    | Ecosystem and habitat maintenance | <a href="#">Watson, R., Zeller, D., &amp; Pauly, D. (2014). Primary productivity demands of global fishing fleets. Fish and Fisheries, 15(2), 231-241.</a>                                                                                                                                                                                                                                                                                                                                                                                                                                                        |
| 27. Responses   | Management                    | Action Plans and Management                            | Number of protection categories for captured species included in the Spanish Catalogue | Societal                          | <a href="https://www.miteco.gob.es/es/Biodiversity/temas/conservacion-de-especies/tabla_lespe_cea_19_tcm30-201186.xlsx">https://www.miteco.gob.es/es/Biodiversity/temas/conservacion-de-especies/tabla_lespe_cea_19_tcm30-201186.xlsx</a>                                                                                                                                                                                                                                                                                                                                                                         |

| DPSIR dimension | Class<br>(Integrated<br>indices) | Type                           | Indicator                                                                                     | Value<br>dimension | Data source                                                                                                                                                                                                                                                                                                                                                                                                                                                                                                                                                                                                                                                                                                                                   |
|-----------------|----------------------------------|--------------------------------|-----------------------------------------------------------------------------------------------|--------------------|-----------------------------------------------------------------------------------------------------------------------------------------------------------------------------------------------------------------------------------------------------------------------------------------------------------------------------------------------------------------------------------------------------------------------------------------------------------------------------------------------------------------------------------------------------------------------------------------------------------------------------------------------------------------------------------------------------------------------------------------------|
| 28. Responses   | Management                       | Action Plans and<br>Management | Number of protection<br>categories for seabirds<br>included in the Spanish<br>Catalogue       | Societal           | <a href="https://www.miteco.gob.es/es/Biodiversity/temas/conservacion-de-especies/tabla_lespe_cea_19_tcm30-201186.xlsx">https://www.miteco.gob.es/es/Biodiversity/temas/conservacion-de-especies/tabla_lespe_cea_19_tcm30-201186.xlsx</a>                                                                                                                                                                                                                                                                                                                                                                                                                                                                                                     |
| 29. Responses   | Management                       | Action Plans and<br>Management | Number of protection<br>categories for cetaceans<br>included in the Spanish<br>Catalogue      | Societal           | <a href="https://www.miteco.gob.es/es/Biodiversity/temas/conservacion-de-especies/tabla_lespe_cea_19_tcm30-201186.xlsx">https://www.miteco.gob.es/es/Biodiversity/temas/conservacion-de-especies/tabla_lespe_cea_19_tcm30-201186.xlsx</a>                                                                                                                                                                                                                                                                                                                                                                                                                                                                                                     |
| 30. Responses   | Management                       | Action Plans and<br>Management | Number of protection<br>categories for sea turtles<br>included in the Spanish<br>Catalogue    | Societal           | <a href="https://www.miteco.gob.es/es/Biodiversity/temas/conservacion-de-especies/tabla_lespe_cea_19_tcm30-201186.xlsx">https://www.miteco.gob.es/es/Biodiversity/temas/conservacion-de-especies/tabla_lespe_cea_19_tcm30-201186.xlsx</a>                                                                                                                                                                                                                                                                                                                                                                                                                                                                                                     |
| 31. Responses   | Management                       | Action Plans and<br>Management | Number of protection<br>categories for seabirds<br>included in the Andalusian<br>Catalogue    | Societal           | <a href="https://www.juntadeandalucia.es/medioambiente/portal_web/web/servicios/centro_de_documentacion_y_biblioteca/fondo_editorial_digital/documentos_tecnicos/Libro_rojo_vertebrados/documento_completo.pdf">https://www.juntadeandalucia.es/medioambiente/portal_web/web/servicios/centro_de_documentacion_y_biblioteca/fondo_editorial_digital/documentos_tecnicos/Libro_rojo_vertebrados/documento_completo.pdf</a>                                                                                                                                                                                                                                                                                                                     |
| 32. Responses   | Management                       | Action Plans and<br>Management | Number of protection<br>categories for cetaceans<br>included in the Andalusian<br>Catalogue   | Societal           | <a href="https://www.juntadeandalucia.es/medioambiente/portal_web/web/servicios/centro_de_documentacion_y_biblioteca/fondo_editorial_digital/documentos_tecnicos/Libro_rojo_vertebrados/documento_completo.pdf">https://www.juntadeandalucia.es/medioambiente/portal_web/web/servicios/centro_de_documentacion_y_biblioteca/fondo_editorial_digital/documentos_tecnicos/Libro_rojo_vertebrados/documento_completo.pdf</a>                                                                                                                                                                                                                                                                                                                     |
| 33. Responses   | Management                       | Action Plans and<br>Management | Number of protection<br>categories for sea turtles<br>included in the Andalusian<br>Catalogue | Societal           | <a href="https://www.juntadeandalucia.es/medioambiente/portal_web/web/servicios/centro_de_documentacion_y_biblioteca/fondo_editorial_digital/documentos_tecnicos/Libro_rojo_vertebrados/documento_completo.pdf">https://www.juntadeandalucia.es/medioambiente/portal_web/web/servicios/centro_de_documentacion_y_biblioteca/fondo_editorial_digital/documentos_tecnicos/Libro_rojo_vertebrados/documento_completo.pdf</a>                                                                                                                                                                                                                                                                                                                     |
| 34. Responses   | Management                       | Action Plans and<br>Management | Number of seabird species<br>included in Birds Directive                                      | Societal           | <a href="http://www.birdlife.org/">http://www.birdlife.org/</a><br><a href="http://ec.europa.eu/environment/nature/legislation/birdsdirective/index_en.htm">http://ec.europa.eu/environment/nature/legislation/birdsdirective/index_en.htm</a>                                                                                                                                                                                                                                                                                                                                                                                                                                                                                                |
| 35. Responses   | Management                       | Action Plans and<br>Management | Number of species<br>included in European and<br>International Fishing<br>Regulations         | Societal           | <a href="https://eur-lex.europa.eu/">https://eur-lex.europa.eu/</a><br><a href="https://www.mapa.gob.es/es/pesca/temas/planes-de-gestion-y-recuperacion-de-especies/plan-de-recuperacion-plurianual-para-el-atun-rojo-del-atlantico-este-y-mediterraneo/">https://www.mapa.gob.es/es/pesca/temas/planes-de-gestion-y-recuperacion-de-especies/plan-de-recuperacion-plurianual-para-el-atun-rojo-del-atlantico-este-y-mediterraneo/</a><br><a href="https://www.mapa.gob.es/es/pesca/temas/planes-de-gestion-y-recuperacion-de-especies/medidas-de-gestion-del-pezu-espada-en-el-mediterraneo/">https://www.mapa.gob.es/es/pesca/temas/planes-de-gestion-y-recuperacion-de-especies/medidas-de-gestion-del-pezu-espada-en-el-mediterraneo/</a> |

| DPSIR dimension | Class<br>(Integrated<br>indices) | Type                                  | Indicator                                                  | Value<br>dimension  | Data source                                                                                                                                                                                                                                                                                                                                                                                                                                                                                                                                                                                                                                                                                                                                   |
|-----------------|----------------------------------|---------------------------------------|------------------------------------------------------------|---------------------|-----------------------------------------------------------------------------------------------------------------------------------------------------------------------------------------------------------------------------------------------------------------------------------------------------------------------------------------------------------------------------------------------------------------------------------------------------------------------------------------------------------------------------------------------------------------------------------------------------------------------------------------------------------------------------------------------------------------------------------------------|
| 36. Responses   | Management                       | Action Plans and Management           | Number of species included in National Fishing Regulations | Societal            | <a href="https://www.mapa.gob.es/es/pesca/temas/planes-de-gestion-y-recuperacion-de-especies/">https://www.mapa.gob.es/es/pesca/temas/planes-de-gestion-y-recuperacion-de-especies/</a>                                                                                                                                                                                                                                                                                                                                                                                                                                                                                                                                                       |
| 37. Responses   | Management                       | Action Plans and Management           | Number of species included in Regional Fishing Regulations | Societal            | <a href="https://www.juntadeandalucia.es/eboja">https://www.juntadeandalucia.es/eboja</a><br><a href="https://www.boe.es">https://www.boe.es</a>                                                                                                                                                                                                                                                                                                                                                                                                                                                                                                                                                                                              |
| 38. Responses   | Management                       | Action Plans and Management           | Number of European and International Fishing Regulations   | Societal            | <a href="https://eur-lex.europa.eu/">https://eur-lex.europa.eu/</a>                                                                                                                                                                                                                                                                                                                                                                                                                                                                                                                                                                                                                                                                           |
| 39. Responses   | Management                       | Action Plans and Management           | Number of National Fishing Regulations                     | Societal            | <a href="https://www.mapama.gob.es/es/pesca/legislacion/Caladeronacional.aspx">https://www.mapama.gob.es/es/pesca/legislacion/Caladeronacional.aspx</a>                                                                                                                                                                                                                                                                                                                                                                                                                                                                                                                                                                                       |
| 40. Responses   | Management                       | Action Plans and Management           | Number of Regional Fishing Regulations                     | Societal            | <a href="https://normativapesquera.wordpress.com/lex-espanola/caladeros/mediterraneo/">https://normativapesquera.wordpress.com/lex-espanola/caladeros/mediterraneo/</a>                                                                                                                                                                                                                                                                                                                                                                                                                                                                                                                                                                       |
| 41. Responses   | Conservation                     | Development of marine protected areas | Number of regulations for protected areas                  | Habitat maintenance | <a href="https://www.miteco.gob.es/es/costas/temas/proteccion-medio-marino/Biodiversity-marina/espacios-marinos-protegidos/red-areas-marinas-protegidas-espana/bm_emprot_rampe_espacios.aspx">https://www.miteco.gob.es/es/costas/temas/proteccion-medio-marino/Biodiversity-marina/espacios-marinos-protegidos/red-areas-marinas-protegidas-espana/bm_emprot_rampe_espacios.aspx</a><br><a href="https://www.miteco.gob.es/es/Biodiversity/servicios/banco-datos-naturaleza/informacion-disponible/zepim.aspx">https://www.miteco.gob.es/es/Biodiversity/servicios/banco-datos-naturaleza/informacion-disponible/zepim.aspx</a>                                                                                                              |
| 42. Responses   | Conservation                     | Development of marine protected areas | Total Number of Marine Protected areas and reserves        | Habitat maintenance | <a href="http://www.reservasmarinas.net">http://www.reservasmarinas.net</a><br><a href="https://www.miteco.gob.es/es/costas/temas/proteccion-medio-marino/Biodiversity-marina/espacios-marinos-protegidos/red-areas-marinas-protegidas-espana/bm_emprot_rampe_espacios.aspx">https://www.miteco.gob.es/es/costas/temas/proteccion-medio-marino/Biodiversity-marina/espacios-marinos-protegidos/red-areas-marinas-protegidas-espana/bm_emprot_rampe_espacios.aspx</a><br><a href="https://www.miteco.gob.es/es/Biodiversity/servicios/banco-datos-naturaleza/informacion-disponible/Espacios_marinos_AGE.aspx">https://www.miteco.gob.es/es/Biodiversity/servicios/banco-datos-naturaleza/informacion-disponible/Espacios_marinos_AGE.aspx</a> |
| 43. Responses   | Conservation                     | Development of marine protected areas | Changes in the Total Marine Protected Area Surface (ha)    | Habitat maintenance | <a href="http://www.reservasmarinas.net">http://www.reservasmarinas.net</a><br><a href="https://www.miteco.gob.es/es/costas/temas/proteccion-medio-marino/Biodiversity-marina/espacios-marinos-protegidos/red-areas-marinas-protegidas-espana/bm_emprot_rampe_espacios.aspx">https://www.miteco.gob.es/es/costas/temas/proteccion-medio-marino/Biodiversity-marina/espacios-marinos-protegidos/red-areas-marinas-protegidas-espana/bm_emprot_rampe_espacios.aspx</a><br><a href="https://www.miteco.gob.es/es/Biodiversity/servicios/banco-datos-naturaleza/informacion-disponible/Espacios_marinos_AGE.aspx">https://www.miteco.gob.es/es/Biodiversity/servicios/banco-datos-naturaleza/informacion-disponible/Espacios_marinos_AGE.aspx</a> |
| 44. Responses   | Conservation                     | Development of marine protected areas | Surface Biosphere Reserve (ha)                             | Habitat maintenance | <a href="http://www.reservasmarinas.net">http://www.reservasmarinas.net</a><br><a href="https://www.miteco.gob.es/es/costas/temas/proteccion-medio-marino/Biodiversity-marina/espacios-marinos-protegidos/red-areas-marinas-protegidas-espana/bm_emprot_rampe_espacios.aspx">https://www.miteco.gob.es/es/costas/temas/proteccion-medio-marino/Biodiversity-marina/espacios-marinos-protegidos/red-areas-marinas-protegidas-espana/bm_emprot_rampe_espacios.aspx</a>                                                                                                                                                                                                                                                                          |

| DPSIR dimension | Class<br>(Integrated indices) | Type                                  | Indicator                                         | Value dimension     | Data source                                                                                                                                                                                                                                                                                                                                                                                                                                                                                                                                                                                                                                                                                                                                                                                                                                                                                                                         |
|-----------------|-------------------------------|---------------------------------------|---------------------------------------------------|---------------------|-------------------------------------------------------------------------------------------------------------------------------------------------------------------------------------------------------------------------------------------------------------------------------------------------------------------------------------------------------------------------------------------------------------------------------------------------------------------------------------------------------------------------------------------------------------------------------------------------------------------------------------------------------------------------------------------------------------------------------------------------------------------------------------------------------------------------------------------------------------------------------------------------------------------------------------|
|                 |                               |                                       |                                                   |                     | <a href="https://www.miteco.gob.es/es/Biodiversity/temas/espacios-protegidos/red-natura-2000/default.aspx">https://www.miteco.gob.es/es/Biodiversity/temas/espacios-protegidos/red-natura-2000/default.aspx</a>                                                                                                                                                                                                                                                                                                                                                                                                                                                                                                                                                                                                                                                                                                                     |
| 45. Responses   | Conservation                  | Development of marine protected areas | Reserva Intercontinental Andalucía-Marruecos (ha) | Habitat maintenance | <a href="http://www.reservasmarinas.net">http://www.reservasmarinas.net</a><br><a href="https://www.miteco.gob.es/es/costas/temas/proteccion-medio-marino/Biodiversity-marina/espacios-marinos-protegidos/red-areas-marinas-protegidas-espana/bm_emprot_rampe_espacios.aspx">https://www.miteco.gob.es/es/costas/temas/proteccion-medio-marino/Biodiversity-marina/espacios-marinos-protegidos/red-areas-marinas-protegidas-espana/bm_emprot_rampe_espacios.aspx</a>                                                                                                                                                                                                                                                                                                                                                                                                                                                                |
| 46. Responses   | Conservation                  | Development of marine protected areas | °SCIs (ha)                                        | Habitat maintenance | <a href="http://www.reservasmarinas.net">http://www.reservasmarinas.net</a><br><a href="https://www.miteco.gob.es/es/costas/temas/proteccion-medio-marino/Biodiversity-marina/espacios-marinos-protegidos/red-areas-marinas-protegidas-espana/bm_emprot_rampe_espacios.aspx">https://www.miteco.gob.es/es/costas/temas/proteccion-medio-marino/Biodiversity-marina/espacios-marinos-protegidos/red-areas-marinas-protegidas-espana/bm_emprot_rampe_espacios.aspx</a><br><a href="https://www.miteco.gob.es/es/Biodiversity/servicios/banco-datos-naturaleza/informacion-disponible/Espacios_marinos_AGE.aspx">https://www.miteco.gob.es/es/Biodiversity/servicios/banco-datos-naturaleza/informacion-disponible/Espacios_marinos_AGE.aspx</a>                                                                                                                                                                                       |
| 47. Responses   | Conservation                  | Development of marine protected areas | °SAC (ha)                                         | Habitat maintenance | <a href="http://www.reservasmarinas.net">http://www.reservasmarinas.net</a><br><a href="https://www.miteco.gob.es/es/costas/temas/proteccion-medio-marino/Biodiversity-marina/espacios-marinos-protegidos/red-areas-marinas-protegidas-espana/bm_emprot_rampe_espacios.aspx">https://www.miteco.gob.es/es/costas/temas/proteccion-medio-marino/Biodiversity-marina/espacios-marinos-protegidos/red-areas-marinas-protegidas-espana/bm_emprot_rampe_espacios.aspx</a><br><a href="https://www.miteco.gob.es/es/Biodiversity/servicios/banco-datos-naturaleza/informacion-disponible/Espacios_marinos_AGE.aspx">https://www.miteco.gob.es/es/Biodiversity/servicios/banco-datos-naturaleza/informacion-disponible/Espacios_marinos_AGE.aspx</a>                                                                                                                                                                                       |
| 48. Responses   | Conservation                  | Development of marine protected areas | Marine Reserve (ha)                               | Habitat maintenance | <a href="http://www.reservasmarinas.net">http://www.reservasmarinas.net</a><br><a href="https://www.miteco.gob.es/es/costas/temas/proteccion-medio-marino/Biodiversity-marina/espacios-marinos-protegidos/red-areas-marinas-protegidas-espana/bm_emprot_rampe_espacios.aspx">https://www.miteco.gob.es/es/costas/temas/proteccion-medio-marino/Biodiversity-marina/espacios-marinos-protegidos/red-areas-marinas-protegidas-espana/bm_emprot_rampe_espacios.aspx</a><br><a href="https://www.miteco.gob.es/es/Biodiversity/servicios/banco-datos-naturaleza/informacion-disponible/Espacios_marinos_AGE.aspx">https://www.miteco.gob.es/es/Biodiversity/servicios/banco-datos-naturaleza/informacion-disponible/Espacios_marinos_AGE.aspx</a>                                                                                                                                                                                       |
| 49. Responses   | Conservation                  | Development of marine protected areas | Paraje Natural (ha)                               | Habitat maintenance | <a href="http://www.reservasmarinas.net">http://www.reservasmarinas.net</a><br><a href="https://www.miteco.gob.es/es/costas/temas/proteccion-medio-marino/Biodiversity-marina/espacios-marinos-protegidos/red-areas-marinas-protegidas-espana/bm_emprot_rampe_espacios.aspx">https://www.miteco.gob.es/es/costas/temas/proteccion-medio-marino/Biodiversity-marina/espacios-marinos-protegidos/red-areas-marinas-protegidas-espana/bm_emprot_rampe_espacios.aspx</a><br><a href="http://www.juntadeandalucia.es/medioambiente/site/porta/web/me_nuitem.7e1cf46ddf59bb227a9ebe205510e1ca/?vgnextoid=2b22ad0b5688f410VgnVCM1000001325e50aRCRD&amp;vgnnextchannel=d8d64e5bf01f4310VgnVCM1000001325e50aRCRD">http://www.juntadeandalucia.es/medioambiente/site/porta/web/me_nuitem.7e1cf46ddf59bb227a9ebe205510e1ca/?vgnextoid=2b22ad0b5688f410VgnVCM1000001325e50aRCRD&amp;vgnnextchannel=d8d64e5bf01f4310VgnVCM1000001325e50aRCRD</a> |
| 50. Responses   | Conservation                  | Development of marine protected areas | Parque Natural (ha)                               | Habitat maintenance | <a href="http://www.reservasmarinas.net">http://www.reservasmarinas.net</a><br><a href="https://www.miteco.gob.es/es/costas/temas/proteccion-medio-marino/Biodiversity-marina/espacios-marinos-protegidos/red-areas-marinas-protegidas-espana/bm_emprot_rampe_espacios.aspx">https://www.miteco.gob.es/es/costas/temas/proteccion-medio-marino/Biodiversity-marina/espacios-marinos-protegidos/red-areas-marinas-protegidas-espana/bm_emprot_rampe_espacios.aspx</a>                                                                                                                                                                                                                                                                                                                                                                                                                                                                |



| DPSIR dimension | Class<br>(Integrated<br>indices) | Type                                        | Indicator                                                  | Value<br>dimension     | Data source                                                                                                                                                                                                                                                                                                                                                                                                                                                                                                                                                                                                                                                                                                                               |
|-----------------|----------------------------------|---------------------------------------------|------------------------------------------------------------|------------------------|-------------------------------------------------------------------------------------------------------------------------------------------------------------------------------------------------------------------------------------------------------------------------------------------------------------------------------------------------------------------------------------------------------------------------------------------------------------------------------------------------------------------------------------------------------------------------------------------------------------------------------------------------------------------------------------------------------------------------------------------|
|                 |                                  |                                             |                                                            |                        | <a href="http://www.juntadeandalucia.es/medioambiente/site/porta/web/menutem.7e1cf46ddf59bb227a9ebe205510e1ca/?vgnextoid=2b22ad0b5688f410VgnVCM1000001325e50aRCRD&amp;vgnextchannel=d8d64e5bf01f4310VgnVCM1000001325e50aRCRD">http://www.juntadeandalucia.es/medioambiente/site/porta/web/menutem.7e1cf46ddf59bb227a9ebe205510e1ca/?vgnextoid=2b22ad0b5688f410VgnVCM1000001325e50aRCRD&amp;vgnextchannel=d8d64e5bf01f4310VgnVCM1000001325e50aRCRD</a>                                                                                                                                                                                                                                                                                     |
| 51. Responses   | Conservation                     | Development of<br>marine protected<br>areas | Biosphere Reserve<br>(n°)                                  | Habitat<br>maintenance | <a href="http://www.reservasmarinas.net">http://www.reservasmarinas.net</a><br><a href="https://www.miteco.gob.es/es/costas/temas/proteccion-medio-marino/Biodiversity-marina/espacios-marinos-protegidos/red-areas-marin-protegidas-espana/bm_emprot_rampe_espacios.aspx">https://www.miteco.gob.es/es/costas/temas/proteccion-medio-marino/Biodiversity-marina/espacios-marinos-protegidos/red-areas-marin-protegidas-espana/bm_emprot_rampe_espacios.aspx</a><br><a href="https://www.miteco.gob.es/es/Biodiversity/temas/espacios-protegidos/red-natura-2000/default.aspx">https://www.miteco.gob.es/es/Biodiversity/temas/espacios-protegidos/red-natura-2000/default.aspx</a>                                                       |
| 52. Responses   | Conservation                     | Development of<br>marine protected<br>areas | Reserva<br>Intercontinental<br>Andalucía-Marruecos<br>(n°) | Habitat<br>maintenance | <a href="http://www.reservasmarinas.net">http://www.reservasmarinas.net</a><br><a href="https://www.miteco.gob.es/es/costas/temas/proteccion-medio-marino/Biodiversity-marina/espacios-marinos-protegidos/red-areas-marin-protegidas-espana/bm_emprot_rampe_espacios.aspx">https://www.miteco.gob.es/es/costas/temas/proteccion-medio-marino/Biodiversity-marina/espacios-marinos-protegidos/red-areas-marin-protegidas-espana/bm_emprot_rampe_espacios.aspx</a>                                                                                                                                                                                                                                                                          |
| 53. Responses   | Conservation                     | Development of<br>marine protected<br>areas | <sup>a</sup> SCIs (n°)                                     | Habitat<br>maintenance | <a href="http://www.reservasmarinas.net">http://www.reservasmarinas.net</a><br><a href="https://www.miteco.gob.es/es/costas/temas/proteccion-medio-marino/Biodiversity-marina/espacios-marinos-protegidos/red-areas-marin-protegidas-espana/bm_emprot_rampe_espacios.aspx">https://www.miteco.gob.es/es/costas/temas/proteccion-medio-marino/Biodiversity-marina/espacios-marinos-protegidos/red-areas-marin-protegidas-espana/bm_emprot_rampe_espacios.aspx</a><br><a href="https://www.miteco.gob.es/es/Biodiversity/servicios/banco-datos-naturaleza/informacion-disponible/Espacios_marinos_AGE.aspx">https://www.miteco.gob.es/es/Biodiversity/servicios/banco-datos-naturaleza/informacion-disponible/Espacios_marinos_AGE.aspx</a> |
| 54. Responses   | Conservation                     | Development of<br>marine protected<br>areas | <sup>b</sup> SPAs (n°)                                     | Habitat<br>maintenance | <a href="http://www.reservasmarinas.net">http://www.reservasmarinas.net</a><br><a href="https://www.miteco.gob.es/es/costas/temas/proteccion-medio-marino/Biodiversity-marina/espacios-marinos-protegidos/red-areas-marin-protegidas-espana/bm_emprot_rampe_espacios.aspx">https://www.miteco.gob.es/es/costas/temas/proteccion-medio-marino/Biodiversity-marina/espacios-marinos-protegidos/red-areas-marin-protegidas-espana/bm_emprot_rampe_espacios.aspx</a><br><a href="https://www.miteco.gob.es/es/Biodiversity/servicios/banco-datos-naturaleza/informacion-disponible/Espacios_marinos_AGE.aspx">https://www.miteco.gob.es/es/Biodiversity/servicios/banco-datos-naturaleza/informacion-disponible/Espacios_marinos_AGE.aspx</a> |
| 55. Responses   | Conservation                     | Development of<br>marine protected<br>areas | <sup>c</sup> SAC (n°)                                      | Habitat<br>maintenance | <a href="http://www.reservasmarinas.net">http://www.reservasmarinas.net</a><br><a href="https://www.miteco.gob.es/es/costas/temas/proteccion-medio-marino/Biodiversity-marina/espacios-marinos-protegidos/red-areas-marin-protegidas-espana/bm_emprot_rampe_espacios.aspx">https://www.miteco.gob.es/es/costas/temas/proteccion-medio-marino/Biodiversity-marina/espacios-marinos-protegidos/red-areas-marin-protegidas-espana/bm_emprot_rampe_espacios.aspx</a><br><a href="https://www.miteco.gob.es/es/Biodiversity/servicios/banco-datos-naturaleza/informacion-disponible/Espacios_marinos_AGE.aspx">https://www.miteco.gob.es/es/Biodiversity/servicios/banco-datos-naturaleza/informacion-disponible/Espacios_marinos_AGE.aspx</a> |
| 56. Responses   | Conservation                     | Development of<br>marine protected<br>areas | Marine Reserve (n°)                                        | Habitat<br>maintenance | <a href="http://www.reservasmarinas.net">http://www.reservasmarinas.net</a><br><a href="https://www.miteco.gob.es/es/costas/temas/proteccion-medio-marino/Biodiversity-marina/espacios-marinos-protegidos/red-areas-marin-protegidas-espana/bm_emprot_rampe_espacios.aspx">https://www.miteco.gob.es/es/costas/temas/proteccion-medio-marino/Biodiversity-marina/espacios-marinos-protegidos/red-areas-marin-protegidas-espana/bm_emprot_rampe_espacios.aspx</a>                                                                                                                                                                                                                                                                          |

| DPSIR dimension | Class<br>(Integrated<br>indices) | Type                                        | Indicator           | Value<br>dimension     | Data source                                                                                                                                                                                                                                                                                                                                                                                                                                                                                                                                                                                                                                                                                                                                                                                                                                                                                                                       |
|-----------------|----------------------------------|---------------------------------------------|---------------------|------------------------|-----------------------------------------------------------------------------------------------------------------------------------------------------------------------------------------------------------------------------------------------------------------------------------------------------------------------------------------------------------------------------------------------------------------------------------------------------------------------------------------------------------------------------------------------------------------------------------------------------------------------------------------------------------------------------------------------------------------------------------------------------------------------------------------------------------------------------------------------------------------------------------------------------------------------------------|
| 57. Responses   | Conservation                     | Development of<br>marine protected<br>areas | Paraje Natural (n°) | Habitat<br>maintenance | <a href="http://www.reservasmarinas.net">http://www.reservasmarinas.net</a><br><a href="https://www.miteco.gob.es/es/costas/temas/proteccion-medio-marino/Biodiversity-marina/espacios-marinos-protegidos/red-areas-marinas-protegidas-espana/bm_emprot_rampe_espacios.aspx">https://www.miteco.gob.es/es/costas/temas/proteccion-medio-marino/Biodiversity-marina/espacios-marinos-protegidos/red-areas-marinas-protegidas-espana/bm_emprot_rampe_espacios.aspx</a><br><a href="http://www.juntadeandalucia.es/medioambiente/site/porta/web/me_nuitem.7e1cf46ddf59bb227a9ebe205510e1ca/?vgnextoid=2b22ad0b5688f410VgnVCM1000001325e50aRCRD&amp;vgnextchannel=d8d64e5bf01f4310VgnVCM1000001325e50aRCRD">http://www.juntadeandalucia.es/medioambiente/site/porta/web/me_nuitem.7e1cf46ddf59bb227a9ebe205510e1ca/?vgnextoid=2b22ad0b5688f410VgnVCM1000001325e50aRCRD&amp;vgnextchannel=d8d64e5bf01f4310VgnVCM1000001325e50aRCRD</a> |
| 58. Responses   | Conservation                     | Development of<br>marine protected<br>areas | Parque Natural (n°) | Habitat<br>maintenance | <a href="http://www.reservasmarinas.net">http://www.reservasmarinas.net</a><br><a href="https://www.miteco.gob.es/es/costas/temas/proteccion-medio-marino/Biodiversity-marina/espacios-marinos-protegidos/red-areas-marinas-protegidas-espana/bm_emprot_rampe_espacios.aspx">https://www.miteco.gob.es/es/costas/temas/proteccion-medio-marino/Biodiversity-marina/espacios-marinos-protegidos/red-areas-marinas-protegidas-espana/bm_emprot_rampe_espacios.aspx</a><br><a href="http://www.juntadeandalucia.es/medioambiente/site/porta/web/me_nuitem.7e1cf46ddf59bb227a9ebe205510e1ca/?vgnextoid=2b22ad0b5688f410VgnVCM1000001325e50aRCRD&amp;vgnextchannel=d8d64e5bf01f4310VgnVCM1000001325e50aRCRD">http://www.juntadeandalucia.es/medioambiente/site/porta/web/me_nuitem.7e1cf46ddf59bb227a9ebe205510e1ca/?vgnextoid=2b22ad0b5688f410VgnVCM1000001325e50aRCRD&amp;vgnextchannel=d8d64e5bf01f4310VgnVCM1000001325e50aRCRD</a> |

<sup>a</sup>Sites of Community Importance (SCI), <sup>b</sup>Special Protection Areas (SPA), <sup>c</sup>Special Areas of Conservation (SAC)

**Table S1.2.** DPSIR`s dimensions of Asturias

| DPSIR dimension | Class<br>(Integrated indices) | Type                           | Indicator                                                               | Value dimension | Data source                                                                                                                                                                                                                                                                                                                                                                                                                                                                                                                                                                                                                                                                    |
|-----------------|-------------------------------|--------------------------------|-------------------------------------------------------------------------|-----------------|--------------------------------------------------------------------------------------------------------------------------------------------------------------------------------------------------------------------------------------------------------------------------------------------------------------------------------------------------------------------------------------------------------------------------------------------------------------------------------------------------------------------------------------------------------------------------------------------------------------------------------------------------------------------------------|
| 1. Drivers      | Cultural                      | Sea care dissemination         | Number of Museums, Centres of environmental education, research centres | Societal        | <a href="https://museomaritimodeasturias.com/">https://museomaritimodeasturias.com/</a><br><a href="http://www.acuario.gijon.es">www.acuario.gijon.es</a><br><a href="https://www.observatorio-acuicultura.es/recursos/bases-de-datos/centros/centro-de-experimentacion-pesquera">https://www.observatorio-acuicultura.es/recursos/bases-de-datos/centros/centro-de-experimentacion-pesquera</a><br><a href="https://www.cifpdelmar.es/">https://www.cifpdelmar.es/</a><br><a href="http://www.destinonavia.com/navia/museos/museo-historias-del-mar_2476_282_2522_0_1_in.html">http://www.destinonavia.com/navia/museos/museo-historias-del-mar_2476_282_2522_0_1_in.html</a> |
| 2. Drivers      | Economic                      | Total amount of income         | Total profit (€)                                                        | Societal        | <a href="https://www.sadei.es/sadei/sector-primario/pesca_192_1_ap.html?f=06_06_04\$06060402.px">https://www.sadei.es/sadei/sector-primario/pesca_192_1_ap.html?f=06_06_04\$06060402.px</a>                                                                                                                                                                                                                                                                                                                                                                                                                                                                                    |
| 3. Drivers      | Economic                      | Seaweed sales income           | Seaweed net profit (€)                                                  | Societal        | <a href="https://tematico.asturias.es/dgpesca/din/estalonj.php">https://tematico.asturias.es/dgpesca/din/estalonj.php</a>                                                                                                                                                                                                                                                                                                                                                                                                                                                                                                                                                      |
| 4. Drivers      | Economic                      | Molluscs sales income          | Molluscs net profit (€)                                                 | Societal        | <a href="https://www.sadei.es/sadei/sector-primario/pesca_192_1_ap.html?f=06_06_04\$06060402.px">https://www.sadei.es/sadei/sector-primario/pesca_192_1_ap.html?f=06_06_04\$06060402.px</a>                                                                                                                                                                                                                                                                                                                                                                                                                                                                                    |
| 5. Drivers      | Economic                      | Cnidarians sales income        | Cnidarians net profit (€)                                               | Societal        | <a href="https://tematico.asturias.es/dgpesca/din/estalonj.php">https://tematico.asturias.es/dgpesca/din/estalonj.php</a>                                                                                                                                                                                                                                                                                                                                                                                                                                                                                                                                                      |
| 6. Drivers      | Economic                      | Crustacean sales income        | Crustaceans net profit (€)                                              | Societal        | <a href="https://www.sadei.es/sadei/sector-primario/pesca_192_1_ap.html?f=06_06_04\$06060402.px">https://www.sadei.es/sadei/sector-primario/pesca_192_1_ap.html?f=06_06_04\$06060402.px</a>                                                                                                                                                                                                                                                                                                                                                                                                                                                                                    |
| 7. Drivers      | Economic                      | Echinoderms sales income       | Echinoderms net profit (€)                                              | Societal        | <a href="https://tematico.asturias.es/dgpesca/din/estalonj.php">https://tematico.asturias.es/dgpesca/din/estalonj.php</a>                                                                                                                                                                                                                                                                                                                                                                                                                                                                                                                                                      |
| 8. Drivers      | Economic                      | Fish sales income              | Fish net profit (€)                                                     | Societal        | <a href="https://www.sadei.es/sadei/sector-primario/pesca_192_1_ap.html?f=06_06_04\$06060402.px">https://www.sadei.es/sadei/sector-primario/pesca_192_1_ap.html?f=06_06_04\$06060402.px</a>                                                                                                                                                                                                                                                                                                                                                                                                                                                                                    |
| 9. Drivers      | Economic                      | Primary producers sales income | Primary producers net profit (€)                                        | Societal        | <a href="http://www.fishbase.org">www.fishbase.org</a><br><a href="http://cephbase.eol.org">http://cephbase.eol.org</a><br><a href="http://www.sealifebase.org/search.php">http://www.sealifebase.org/search.php</a><br><a href="http://species-identification.org/search.php">http://species-identification.org/search.php</a><br><a href="http://www.seararoundus.org/data/">http://www.seararoundus.org/data/</a><br><a href="http://www.ices.dk/marine-data/dataset-collections/Pages/default.aspx">http://www.ices.dk/marine-data/dataset-collections/Pages/default.aspx</a><br><a href="http://www.marinespecies.org/">http://www.marinespecies.org/</a>                 |
| 10. Drivers     | Economic                      | Filterers sales income         | Filterers net profit (€)                                                | Societal        |                                                                                                                                                                                                                                                                                                                                                                                                                                                                                                                                                                                                                                                                                |
| 11. Drivers     | Economic                      | Detritivores sales income      | Detritivores net profit (€)                                             | Societal        |                                                                                                                                                                                                                                                                                                                                                                                                                                                                                                                                                                                                                                                                                |
| 12. Drivers     | Economic                      | Herbivores sales income        | Herbivores net profit (€)                                               | Societal        |                                                                                                                                                                                                                                                                                                                                                                                                                                                                                                                                                                                                                                                                                |

| DPSIR dimension | Class<br>(Integrated indices) | Type                                     | Indicator                              | Value dimension            | Data source |
|-----------------|-------------------------------|------------------------------------------|----------------------------------------|----------------------------|-------------|
| 13. Drivers     | Economic                      | Omnivores 1 income                       | Omnivores 1 net profit (€)             | Societal                   |             |
| 14. Drivers     | Economic                      | Omnivores 2 sales income                 | Omnivores 2 net profit (€)             | Societal                   |             |
| 15. Drivers     | Economic                      | Carnivores 1 sales income                | Carnivores 1 net profit (€)            | Omnivores 1 net profit (€) |             |
| 16. Drivers     | Economic                      | Carnivores 2 sales income                | Carnivores 2 net profit (€)            | Societal                   |             |
| 17. Drivers     | Economic                      | Carnivores 3 sales income                | Carnivores 3 net profit (€)            | Societal                   |             |
| 18. Drivers     | Economic                      | Top predators sales income               | Top predators net profit (€)           | Societal                   |             |
| 19. Drivers     | Economic                      | Reef spp sales income                    | Reef spp net profit (€)                | Societal                   |             |
| 20. Drivers     | Economic                      | Bathydemersal spp sales income           | Bathydemersal net profit (€)           | Societal                   |             |
| 21. Drivers     | Economic                      | Bathypelagic spp sales income            | Bathypelagic net profit (€)            | Societal                   |             |
| 22. Drivers     | Economic                      | Bentho-neritic-demersal spp sales income | Bentho-neritic-demersal net profit (€) | Societal                   |             |
| 23. Drivers     | Economic                      | Benthonic spp sales income               | Benthonic net profit(€)                | Societal                   |             |
| 24. Drivers     | Economic                      | Benthopelagic spp sales income           | Benthopelagic net profit (€)           | Societal                   |             |
| 25. Drivers     | Economic                      | Demersal spp sales income                | Demersal net profit (€)                | Societal                   |             |

| DPSIR dimension | Class<br>(Integrated indices) | Type                                                        | Indicator                                                                     | Value dimension | Data source                                                                                                                                                                                                                                                       |
|-----------------|-------------------------------|-------------------------------------------------------------|-------------------------------------------------------------------------------|-----------------|-------------------------------------------------------------------------------------------------------------------------------------------------------------------------------------------------------------------------------------------------------------------|
| 26. Drivers     | Economic                      | Pelagic spp sales income                                    | Pelagic net profit (€)                                                        | Societal        |                                                                                                                                                                                                                                                                   |
| 27. Drivers     | Economic                      | Pelagic-neritic spp sales income                            | Pelagic-neritic net profit (€)                                                | Societal        |                                                                                                                                                                                                                                                                   |
| 28. Drivers     | Economic                      | Amount of fish consumed by the population                   | Per capita fish consumption (kg/hab)                                          | Societal        | <a href="https://www.mapa.gob.es/es/alimentacion/temas/consumo-tendencias/panel-de-consumo-alimentario/series-anuales/default.aspx">https://www.mapa.gob.es/es/alimentacion/temas/consumo-tendencias/panel-de-consumo-alimentario/series-anuales/default.aspx</a> |
| 29. Drivers     | Economic                      | Amount of money spent by the population on fish consumption | Fish per capita spending (€/hab)                                              | Societal        | <a href="https://www.mapa.gob.es/es/alimentacion/temas/consumo-tendencias/panel-de-consumo-alimentario/series-anuales/default.aspx">https://www.mapa.gob.es/es/alimentacion/temas/consumo-tendencias/panel-de-consumo-alimentario/series-anuales/default.aspx</a> |
| 30. Drivers     | Demographic                   | Human population density                                    | Population (n° hab/yr)                                                        | Societal        | <a href="https://www.ine.es/jaxiT3/Tabla.htm?t=31304">https://www.ine.es/jaxiT3/Tabla.htm?t=31304</a>                                                                                                                                                             |
| 31. Pressures   | Overexploitation              | Development of Industrial fishing gear                      | N° industrial vessels                                                         | Societal        | <a href="https://www.ige.eu/web/mostrar_actividade_estadistica.jsp?idioma=gl&amp;codigo=0301004">https://www.ige.eu/web/mostrar_actividade_estadistica.jsp?idioma=gl&amp;codigo=0301004</a>                                                                       |
| 32. Pressures   | Overexploitation              | Development of Industrial fishing gear                      | Gross tonnage of industrial vessels                                           | Societal        | <a href="https://www.ige.eu/web/mostrar_actividade_estadistica.jsp?idioma=gl&amp;codigo=0301004">https://www.ige.eu/web/mostrar_actividade_estadistica.jsp?idioma=gl&amp;codigo=0301004</a>                                                                       |
| 33. Pressures   | Overexploitation              | Development of Industrial fishing gear                      | Total power of industrial fisheries vessels (kW)                              | Societal        | <a href="https://www.ige.eu/web/mostrar_actividade_estadistica.jsp?idioma=gl&amp;codigo=0301004">https://www.ige.eu/web/mostrar_actividade_estadistica.jsp?idioma=gl&amp;codigo=0301004</a>                                                                       |
| 34. Pressures   | Land use change               | Transformation of coastal ecosystem                         | Number of plots built per property                                            | Societal        | <a href="https://www.catastro.meh.es/esp/estadistica_1.asp">https://www.catastro.meh.es/esp/estadistica_1.asp</a>                                                                                                                                                 |
| 35. State       | Biodiversity loss             | Exploited marine biodiversity                               | Number of spp of captured fish in IUCN red list (NT, VU, EN o CR) IUCN Global | Biodiversity    | <a href="https://www.iucnredlist.org/">https://www.iucnredlist.org/</a>                                                                                                                                                                                           |

| DPSIR dimension | Class<br>(Integrated indices) | Type                          | Indicator                                                                              | Value dimension | Data source                                                                                                                                                                                                                                     |
|-----------------|-------------------------------|-------------------------------|----------------------------------------------------------------------------------------|-----------------|-------------------------------------------------------------------------------------------------------------------------------------------------------------------------------------------------------------------------------------------------|
| 36. State       | Biodiversity loss             | Exploited marine biodiversity | Number of spp of captured bony fish in IUCN red list (NT, VU, EN o CR) Europe          | Biodiversity    | <a href="https://www.iucnredlist.org/">https://www.iucnredlist.org/</a>                                                                                                                                                                         |
| 37. State       | Biodiversity loss             | Exploited marine biodiversity | Number of spp of captured bony fish in Red Book Asturias                               | Biodiversity    | <a href="https://www0.asturias.es/medioambiente/publicaciones/ficheros/Libro%20Rojo%20de%20la%20Fauna%20de%20Asturias.pdf">https://www0.asturias.es/medioambiente/publicaciones/ficheros/Libro%20Rojo%20de%20la%20Fauna%20de%20Asturias.pdf</a> |
| 38. State       | Biodiversity loss             | Exploited marine biodiversity | Number of spp of captured elasmobranchs fish in IUCN red list (NT, VU, EN o CR) Global | Biodiversity    | <a href="https://www.iucnredlist.org/">https://www.iucnredlist.org/</a>                                                                                                                                                                         |
| 39. State       | Biodiversity loss             | Exploited marine biodiversity | Number of spp of captured elasmobranchs fish in IUCN red list (NT, VU, EN o CR) Europe | Biodiversity    | <a href="https://www.iucnredlist.org/">https://www.iucnredlist.org/</a>                                                                                                                                                                         |
| 40. State       | Biodiversity loss             | Exploited marine biodiversity | Number of spp of captured elasmobranchs in Red Book Asturias                           | Biodiversity    | <a href="https://www0.asturias.es/medioambiente/publicaciones/ficheros/Libro%20Rojo%20de%20la%20Fauna%20de%20Asturias.pdf">https://www0.asturias.es/medioambiente/publicaciones/ficheros/Libro%20Rojo%20de%20la%20Fauna%20de%20Asturias.pdf</a> |
| 41. State       | Biodiversity loss             | Exploited marine biodiversity | Number of spp of captured molluscs in IUCN red list (NT, VU, EN o CR) Global           | Biodiversity    | <a href="https://www.iucnredlist.org/">https://www.iucnredlist.org/</a>                                                                                                                                                                         |
| 42. State       | Biodiversity loss             | Exploited marine biodiversity | Number of spp of captured molluscs in IUCN red list (NT, VU, EN o CR) Europe           | Biodiversity    | <a href="https://www.iucnredlist.org/">https://www.iucnredlist.org/</a>                                                                                                                                                                         |

| DPSIR dimension | Class<br>(Integrated indices) | Type                          | Indicator                                                                      | Value dimension | Data source                                                                                                                                                                                                                                     |
|-----------------|-------------------------------|-------------------------------|--------------------------------------------------------------------------------|-----------------|-------------------------------------------------------------------------------------------------------------------------------------------------------------------------------------------------------------------------------------------------|
| 43. State       | Biodiversity loss             | Exploited marine biodiversity | Number of spp of captured molluscs in Red Book Asturias                        | Biodiversity    | <a href="https://www0.asturias.es/medioambiente/publicaciones/ficheros/Libro%20Rojo%20de%20la%20Fauna%20de%20Asturias.pdf">https://www0.asturias.es/medioambiente/publicaciones/ficheros/Libro%20Rojo%20de%20la%20Fauna%20de%20Asturias.pdf</a> |
| 44. State       | Biodiversity loss             | Exploited marine biodiversity | Number of spp of captured arthropods in IUCN red list (NT, VU, EN o CR) Global | Biodiversity    | <a href="https://www.iucnredlist.org/">https://www.iucnredlist.org/</a>                                                                                                                                                                         |
| 45. State       | Biodiversity loss             | Exploited marine biodiversity | Number of spp of captured arthropods in IUCN red list (NT, VU, EN o CR) Europe | Biodiversity    | <a href="https://www.iucnredlist.org/">https://www.iucnredlist.org/</a>                                                                                                                                                                         |
| 46. State       | Biodiversity loss             | Exploited marine biodiversity | Number of spp of captured arthropods in Red Book Asturias                      | Biodiversity    | <a href="https://www0.asturias.es/medioambiente/publicaciones/ficheros/Libro%20Rojo%20de%20la%20Fauna%20de%20Asturias.pdf">https://www0.asturias.es/medioambiente/publicaciones/ficheros/Libro%20Rojo%20de%20la%20Fauna%20de%20Asturias.pdf</a> |
| 47. State       | Biodiversity loss             | Exploited marine biodiversity | Number of spp of captured seaweed in IUCN red list (NT, VU, EN o CR) Global    | Biodiversity    | <a href="https://www.iucnredlist.org/">https://www.iucnredlist.org/</a>                                                                                                                                                                         |
| 48. State       | Biodiversity loss             | Exploited marine biodiversity | Number of spp of captured seaweed in IUCN red list (NT, VU, EN o CR) Europe    | Biodiversity    | <a href="https://www.iucnredlist.org/">https://www.iucnredlist.org/</a>                                                                                                                                                                         |
| 49. State       | Biodiversity loss             | Exploited marine biodiversity | Number of spp of captured seaweed in Red Book Asturias                         | Biodiversity    | <a href="https://www0.asturias.es/medioambiente/publicaciones/ficheros/Libro%20Rojo%20de%20la%20Fauna%20de%20Asturias.pdf">https://www0.asturias.es/medioambiente/publicaciones/ficheros/Libro%20Rojo%20de%20la%20Fauna%20de%20Asturias.pdf</a> |

| DPSIR dimension | Class<br>(Integrated indices) | Type                          | Indicator                                                              | Value dimension | Data source                                                                                                                                                                                                                                     |
|-----------------|-------------------------------|-------------------------------|------------------------------------------------------------------------|-----------------|-------------------------------------------------------------------------------------------------------------------------------------------------------------------------------------------------------------------------------------------------|
| 50. State       | Biodiversity loss             | Exploited marine biodiversity | Number of other spp captured in IUCN red list (NT, VU, EN o CR) Global | Biodiversity    | <a href="https://www.iucnredlist.org/">https://www.iucnredlist.org/</a>                                                                                                                                                                         |
| 51. State       | Biodiversity loss             | Exploited marine biodiversity | Number of other spp captured in IUCN red list (NT, VU, EN o CR) Europe | Biodiversity    | <a href="https://www.iucnredlist.org/">https://www.iucnredlist.org/</a>                                                                                                                                                                         |
| 52. State       | Biodiversity loss             | Exploited marine biodiversity | Number of other spp captured in Red Book Asturias                      | Biodiversity    | <a href="https://www0.asturias.es/medioambiente/publicaciones/ficheros/Libro%20Rojo%20de%20la%20Fauna%20de%20Asturias.pdf">https://www0.asturias.es/medioambiente/publicaciones/ficheros/Libro%20Rojo%20de%20la%20Fauna%20de%20Asturias.pdf</a> |
| 53. State       | Biodiversity loss             | Exploited marine biodiversity | Richness of captured species                                           | Biodiversity    | *estimated*                                                                                                                                                                                                                                     |
| 54. State       | Biodiversity loss             | Jeopardized biodiversity      | Number of cetaceans in IUCN red list (NT, VU, EN o CR) Global          | Biodiversity    | <a href="https://www.iucnredlist.org/">https://www.iucnredlist.org/</a>                                                                                                                                                                         |
| 55. State       | Biodiversity loss             | Jeopardized biodiversity      | Number of cetaceans in IUCN red list (NT, VU, EN o CR) Europe          | Biodiversity    | <a href="https://www.iucnredlist.org/">https://www.iucnredlist.org/</a>                                                                                                                                                                         |
| 56. State       | Biodiversity loss             | Jeopardized biodiversity      | Number of cetaceans in Red Book Asturias                               | Biodiversity    | <a href="https://www0.asturias.es/medioambiente/publicaciones/ficheros/Libro%20Rojo%20de%20la%20Fauna%20de%20Asturias.pdf">https://www0.asturias.es/medioambiente/publicaciones/ficheros/Libro%20Rojo%20de%20la%20Fauna%20de%20Asturias.pdf</a> |



| DPSIR dimension | Class<br>(Integrated indices) | Type                     | Indicator                                                    | Value dimension | Data source                                                                                                                                                                                                                                     |
|-----------------|-------------------------------|--------------------------|--------------------------------------------------------------|-----------------|-------------------------------------------------------------------------------------------------------------------------------------------------------------------------------------------------------------------------------------------------|
| 57. State       | Biodiversity loss             | Jeopardized biodiversity | Number of seabirds in IUCN red list (NT, VU, EN o CR) Global | Biodiversity    | <a href="https://www.iucnredlist.org/">https://www.iucnredlist.org/</a>                                                                                                                                                                         |
| 58. State       | Biodiversity loss             | Jeopardized biodiversity | Number of seabirds in IUCN red list (NT, VU, EN o CR) Europe | Biodiversity    | <a href="https://www.iucnredlist.org/">https://www.iucnredlist.org/</a>                                                                                                                                                                         |
| 59. State       | Biodiversity loss             | Jeopardized biodiversity | Number of seabirds in Red Book Asturias                      | Biodiversity    | <a href="https://www0.asturias.es/medioambiente/publicaciones/ficheros/Libro%20Rojo%20de%20la%20Fauna%20de%20Asturias.pdf">https://www0.asturias.es/medioambiente/publicaciones/ficheros/Libro%20Rojo%20de%20la%20Fauna%20de%20Asturias.pdf</a> |
| 60. State       | Biodiversity loss             | Jeopardized biodiversity | Number of turtles in IUCN red list (NT, VU, EN o CR) Global  | Biodiversity    | <a href="https://www.iucnredlist.org/">https://www.iucnredlist.org/</a>                                                                                                                                                                         |
| 61. State       | Biodiversity loss             | Jeopardized biodiversity | Number of turtles in IUCN red list (NT, VU, EN o CR) Europe  | Biodiversity    | <a href="https://www.iucnredlist.org/">https://www.iucnredlist.org/</a>                                                                                                                                                                         |
| 62. State       | Biodiversity loss             | Jeopardized biodiversity | Number of turtles in Red Book Asturias                       | Biodiversity    | <a href="https://www0.asturias.es/medioambiente/publicaciones/ficheros/Libro%20Rojo%20de%20la%20Fauna%20de%20Asturias.pdf">https://www0.asturias.es/medioambiente/publicaciones/ficheros/Libro%20Rojo%20de%20la%20Fauna%20de%20Asturias.pdf</a> |

| DPSIR dimension | Class<br>(Integrated indices)  | Type                                                                                                             | Indicator                                   | Value dimension                   | Data source                                                                                                                                                                                     |
|-----------------|--------------------------------|------------------------------------------------------------------------------------------------------------------|---------------------------------------------|-----------------------------------|-------------------------------------------------------------------------------------------------------------------------------------------------------------------------------------------------|
| 63. Impacts     | Provisioning Ecosystem service | Animals for food. Evolution of total biomass of fisheries, including fish and shellfish species, expressed in kg | Total fisheries biomass for all groups (kg) | Material                          | <a href="https://www.sadei.es/sadei/sector-primario/pesca_192_1_ap.html?f=06_06_04\$\$06060402.px">https://www.sadei.es/sadei/sector-primario/pesca_192_1_ap.html?f=06_06_04\$\$06060402.px</a> |
| 64. Impacts     | Regulating ecosystem service   | Biological control of marine food web integrity                                                                  | Primary productivity required (PPR)         | Ecosystem and habitat maintenance | Cálculo con nuestros indicadores a partir de Pauly, D, Christensen, V. 1995. Primary production required to sustain global fisheries. Nature 374: 255–257                                       |

| DPSIR dimension | Class<br>(Integrated indices) | Type                                                                                                                                        | Indicator                                                       | Value dimension                   | Data source                                                                                                                                                                                                                                                                                                                                                                                                                                                                                                                                                                                                                                                                                                                                                                                                                                                                                                                                                                                                                                                                                                                                                                                                                                                                                                                                                                                                                                                                                                                    |
|-----------------|-------------------------------|---------------------------------------------------------------------------------------------------------------------------------------------|-----------------------------------------------------------------|-----------------------------------|--------------------------------------------------------------------------------------------------------------------------------------------------------------------------------------------------------------------------------------------------------------------------------------------------------------------------------------------------------------------------------------------------------------------------------------------------------------------------------------------------------------------------------------------------------------------------------------------------------------------------------------------------------------------------------------------------------------------------------------------------------------------------------------------------------------------------------------------------------------------------------------------------------------------------------------------------------------------------------------------------------------------------------------------------------------------------------------------------------------------------------------------------------------------------------------------------------------------------------------------------------------------------------------------------------------------------------------------------------------------------------------------------------------------------------------------------------------------------------------------------------------------------------|
| 65. Impacts     | Regulating ecosystem service  | Biological control of marine food web integrity                                                                                             | Marine Trophic Index (MTI).                                     | Ecosystem and habitat maintenance | Cálculo con nuestros indicadores a partir de Pauly, D., & Watson, R. 2005. Background and interpretation of the 'Marine Trophic Index' as a measure of biodiversity. Philosophical Transactions of the Royal Society B: Biological Sciences, 360(1454), 415-423. doi:10.1098/rstb.2004.1597                                                                                                                                                                                                                                                                                                                                                                                                                                                                                                                                                                                                                                                                                                                                                                                                                                                                                                                                                                                                                                                                                                                                                                                                                                    |
| 66. Impacts     | Cultural ecosystem service    | Development of Artisanal fishing gear                                                                                                       | n° artisanal vessels                                            | Societal                          | <a href="https://www.ige.eu/web/mostrar_actividade_estatistica.jsp?idioma=gl&amp;codigo=0301004">https://www.ige.eu/web/mostrar_actividade_estatistica.jsp?idioma=gl&amp;codigo=0301004</a>                                                                                                                                                                                                                                                                                                                                                                                                                                                                                                                                                                                                                                                                                                                                                                                                                                                                                                                                                                                                                                                                                                                                                                                                                                                                                                                                    |
| 67. Impacts     | Cultural ecosystem service    | Development of Artisanal fishing gear                                                                                                       | Gross tonnage of artisanal vessels                              | Societal                          | <a href="https://www.ige.eu/web/mostrar_actividade_estatistica.jsp?idioma=gl&amp;codigo=0301004">https://www.ige.eu/web/mostrar_actividade_estatistica.jsp?idioma=gl&amp;codigo=0301004</a>                                                                                                                                                                                                                                                                                                                                                                                                                                                                                                                                                                                                                                                                                                                                                                                                                                                                                                                                                                                                                                                                                                                                                                                                                                                                                                                                    |
| 68. Impacts     | Cultural ecosystem service    | Development of Artisanal fishing gear                                                                                                       | Total power of artisanal fisheries vessels (kW)                 | Societal                          | <a href="https://www.ige.eu/web/mostrar_actividade_estatistica.jsp?idioma=gl&amp;codigo=0301004">https://www.ige.eu/web/mostrar_actividade_estatistica.jsp?idioma=gl&amp;codigo=0301004</a>                                                                                                                                                                                                                                                                                                                                                                                                                                                                                                                                                                                                                                                                                                                                                                                                                                                                                                                                                                                                                                                                                                                                                                                                                                                                                                                                    |
| 69. Impacts     | Cultural ecosystem service    | Number of Fish producer organizations, fishermen associations, business associations representative of the fisheries and aquaculture sector | Evolution of the number of professional fishermen organizations | Good social relationships         | <a href="https://www.fis.com/fis/companies/details.asp?l=s&amp;filterby=companies&amp;=&amp;country_id=&amp;page=1&amp;company_id=163792&amp;submenu=info">https://www.fis.com/fis/companies/details.asp?l=s&amp;filterby=companies&amp;=&amp;country_id=&amp;page=1&amp;company_id=163792&amp;submenu=info</a><br><a href="https://www.cepes.es/principal/members/91_federacion-nacional-cofradias-pescadores-fncp">https://www.cepes.es/principal/members/91_federacion-nacional-cofradias-pescadores-fncp</a>                                                                                                                                                                                                                                                                                                                                                                                                                                                                                                                                                                                                                                                                                                                                                                                                                                                                                                                                                                                                               |
| 70. Impacts     | Cultural ecosystem service    | Número de mujeres que se encuentran en activo en este mundo pesquero                                                                        | Number of women who are active in this fishing world            | Good social relationships         | <a href="https://www.ige.eu/igebdt/selector.jsp?COD=466&amp;paxina=001&amp;c=0301004">https://www.ige.eu/igebdt/selector.jsp?COD=466&amp;paxina=001&amp;c=0301004</a><br><a href="http://www.sadei.es/es/portal.do?IDM=19&amp;NM=2">http://www.sadei.es/es/portal.do?IDM=19&amp;NM=2</a><br>Dirección Provincial del Instituto Social de la Marina (Tel. 985 32 72 00)<br><a href="https://www.ige.eu/igebdt/esqv.jsp?ruta=verTabla.jsp?OP=1&amp;B=1&amp;M=&amp;COD=5355&amp;R=2[all]&amp;C=1[2001]&amp;F=&amp;S=&amp;SCF=">https://www.ige.eu/igebdt/esqv.jsp?ruta=verTabla.jsp?OP=1&amp;B=1&amp;M=&amp;COD=5355&amp;R=2[all]&amp;C=1[2001]&amp;F=&amp;S=&amp;SCF=</a><br><a href="http://www.anmupesca.org/">http://www.anmupesca.org/</a><br><a href="https://www.mapa.gob.es/es/pesca/temas/red-mujeres/analisis_y_diagnosticos.aspx">https://www.mapa.gob.es/es/pesca/temas/red-mujeres/analisis_y_diagnosticos.aspx</a><br><a href="https://www.mapa.gob.es/es/pesca/temas/red-mujeres/otros_documentos.aspx">https://www.mapa.gob.es/es/pesca/temas/red-mujeres/otros_documentos.aspx</a><br><a href="https://www.mapa.gob.es/es/pesca/temas/red-mujeres/plan_de_igualdad_pesca.aspx">https://www.mapa.gob.es/es/pesca/temas/red-mujeres/plan_de_igualdad_pesca.aspx</a><br><a href="https://www.mapa.gob.es/es/pesca/temas/red-mujeres/DOSSIER%20EXPERIENCIAS_tcm30-285691.pdf">mujeres/DOSSIER%20EXPERIENCIAS_tcm30-285691.pdf</a><br><a href="http://akteaplatform.eu/?lang=es">http://akteaplatform.eu/?lang=es</a> |

| DPSIR dimension | Class<br>(Integrated indices) | Type                                                                          | Indicator                                                                                                                                                                     | Value dimension           | Data source                                                                                                                                                                                                                                                                                                                                                                                                                                                                                                                                                                                                                                                                                                                                                                                                                                                                                                                                                                                                                                                               |
|-----------------|-------------------------------|-------------------------------------------------------------------------------|-------------------------------------------------------------------------------------------------------------------------------------------------------------------------------|---------------------------|---------------------------------------------------------------------------------------------------------------------------------------------------------------------------------------------------------------------------------------------------------------------------------------------------------------------------------------------------------------------------------------------------------------------------------------------------------------------------------------------------------------------------------------------------------------------------------------------------------------------------------------------------------------------------------------------------------------------------------------------------------------------------------------------------------------------------------------------------------------------------------------------------------------------------------------------------------------------------------------------------------------------------------------------------------------------------|
| 71. Impacts     | Cultural ecosystem service    | Number of women associations (REMSP)                                          | Evolution of the number of women fishermen associations                                                                                                                       | Good social relationships | <a href="https://www.mapa.gob.es/es/pesca/temas/red-mujeres/directorio.aspx">https://www.mapa.gob.es/es/pesca/temas/red-mujeres/directorio.aspx</a>                                                                                                                                                                                                                                                                                                                                                                                                                                                                                                                                                                                                                                                                                                                                                                                                                                                                                                                       |
| 72. Impacts     | Cultural ecosystem service    | Number of diving centers and whale watching companies                         | Temporal evolution of the number of diving centers and whalewatching companies                                                                                                | Societal                  | <a href="https://www.cluborca.es/">https://www.cluborca.es/</a><br><a href="http://www.formarbuceo.com/">http://www.formarbuceo.com/</a><br><a href="http://www.buceoastur.com">http://www.buceoastur.com</a><br><a href="http://o2divecenter.com/">http://o2divecenter.com/</a><br><a href="http://www.astuerasub.org/">http://www.astuerasub.org/</a><br><a href="https://www.proditech.es/">https://www.proditech.es/</a><br><a href="http://www.mar-ivysub.com/">http://www.mar-ivysub.com/</a><br><a href="https://speedywater.com/">https://speedywater.com/</a><br><a href="http://clubgeas.es/">http://clubgeas.es/</a><br><a href="https://www.cronos-sub.es/">https://www.cronos-sub.es/</a><br><a href="http://apneagijon.org/">http://apneagijon.org/</a><br><a href="https://buceomolamola.wordpress.com/?fbclid=IwAR18rJ0GkOHDIdJmtyi06sXfhAkGAX8RQNziqEIAg44qjCxcgLMmUyAef8A">https://buceomolamola.wordpress.com/?fbclid=IwAR18rJ0GkOHDIdJmtyi06sXfhAkGAX8RQNziqEIAg44qjCxcgLMmUyAef8A</a><br><a href="https://yemayasub.com/">https://yemayasub.com/</a> |
| 73. Responses   | Conservation                  | Development of marine protected areas and Action Plans and species Management | Number of regulations for the creation of marine protected areas, regulation of marine resources and plans for the conservation and recovery of species at the National level | Habitat maintenance       | <a href="https://eur-lex.europa.eu/">https://eur-lex.europa.eu/</a><br><a href="https://www.mapama.gob.es/es/Biodiversity/temas/espacios-protegidos/red-natura-2000">https://www.mapama.gob.es/es/Biodiversity/temas/espacios-protegidos/red-natura-2000</a><br><a href="https://normativapesquera.wordpress.com/lex-espanola/caladeros">https://normativapesquera.wordpress.com/lex-espanola/caladeros</a><br><a href="https://www.mapama.gob.es/es/pesca/legislacion/Caladeronacional.aspx">https://www.mapama.gob.es/es/pesca/legislacion/Caladeronacional.aspx</a><br><a href="https://tematico.asturias.es/dgpesca/din/legipes.php?go=1">https://tematico.asturias.es/dgpesca/din/legipes.php?go=1</a><br><a href="https://sede.asturias.es/legislacion-consolidada">https://sede.asturias.es/legislacion-consolidada</a>                                                                                                                                                                                                                                            |
| 74. Responses   | Conservation                  | Development of marine protected areas and Action Plans and species Management | Number of regulations for the creation of marine protected areas, regulation of marine resources and plans for the conservation and recovery of species at the Regional level | Habitat maintenance       | <a href="https://eur-lex.europa.eu/">https://eur-lex.europa.eu/</a><br><a href="https://www.mapama.gob.es/es/Biodiversity/temas/espacios-protegidos/red-natura-2000">https://www.mapama.gob.es/es/Biodiversity/temas/espacios-protegidos/red-natura-2000</a><br><a href="https://normativapesquera.wordpress.com/lex-espanola/caladeros">https://normativapesquera.wordpress.com/lex-espanola/caladeros</a><br><a href="https://www.mapama.gob.es/es/pesca/legislacion/Caladeronacional.aspx">https://www.mapama.gob.es/es/pesca/legislacion/Caladeronacional.aspx</a><br><a href="https://tematico.asturias.es/dgpesca/din/legipes.php?go=1">https://tematico.asturias.es/dgpesca/din/legipes.php?go=1</a><br><a href="https://sede.asturias.es/legislacion-consolidada">https://sede.asturias.es/legislacion-consolidada</a>                                                                                                                                                                                                                                            |

| DPSIR dimension | Class<br>(Integrated indices) | Type                                                                          | Indicator                                                                                                                                                                     | Value dimension     | Data source                                                                                                                                                                                                                                                                                                                                                                                                                                                                                                                                                                                                                                                                                                                                                                                                                    |
|-----------------|-------------------------------|-------------------------------------------------------------------------------|-------------------------------------------------------------------------------------------------------------------------------------------------------------------------------|---------------------|--------------------------------------------------------------------------------------------------------------------------------------------------------------------------------------------------------------------------------------------------------------------------------------------------------------------------------------------------------------------------------------------------------------------------------------------------------------------------------------------------------------------------------------------------------------------------------------------------------------------------------------------------------------------------------------------------------------------------------------------------------------------------------------------------------------------------------|
| 75. Responses   | Conservation                  | Development of marine protected areas and Action Plans and species Management | Number of regulations for the creation of marine protected areas, regulation of marine resources and plans for the conservation and recovery of species at the European level | Habitat maintenance | <a href="https://eur-lex.europa.eu/">https://eur-lex.europa.eu/</a><br><a href="https://www.mapama.gob.es/es/Biodiversity/temas/espacios-protegidos/red-natura-2000">https://www.mapama.gob.es/es/Biodiversity/temas/espacios-protegidos/red-natura-2000</a><br><a href="https://normativapesquera.wordpress.com/lex-espanola/caladeros">https://normativapesquera.wordpress.com/lex-espanola/caladeros</a><br><a href="https://www.mapama.gob.es/es/pesca/legislacion/Caladeronacional.aspx">https://www.mapama.gob.es/es/pesca/legislacion/Caladeronacional.aspx</a><br><a href="https://tematico.asturias.es/dgpesca/din/legipes.php?go=1">https://tematico.asturias.es/dgpesca/din/legipes.php?go=1</a><br><a href="https://sede.asturias.es/legislacion-consolidada">https://sede.asturias.es/legislacion-consolidada</a> |
| 76. Responses   | Conservation                  | Development of marine protected areas                                         | Changes in the Natura 2000 Network Protected Area (km²)                                                                                                                       | Habitat maintenance | <a href="#">Natura 2000 Network Viewer (europa.eu)</a>                                                                                                                                                                                                                                                                                                                                                                                                                                                                                                                                                                                                                                                                                                                                                                         |
| 77. Responses   | Management                    | Action Plans and Management                                                   | Number of Regional Fishing Regulations                                                                                                                                        | Societal            | <a href="https://eur-lex.europa.eu/">https://eur-lex.europa.eu/</a><br><a href="https://www.mapama.gob.es/es/Biodiversity/temas/espacios-protegidos/red-natura-2000">https://www.mapama.gob.es/es/Biodiversity/temas/espacios-protegidos/red-natura-2000</a><br><a href="https://normativapesquera.wordpress.com/lex-espanola/caladeros">https://normativapesquera.wordpress.com/lex-espanola/caladeros</a><br><a href="https://www.mapama.gob.es/es/pesca/legislacion/Caladeronacional.aspx">https://www.mapama.gob.es/es/pesca/legislacion/Caladeronacional.aspx</a><br><a href="https://tematico.asturias.es/dgpesca/din/legipes.php?go=1">https://tematico.asturias.es/dgpesca/din/legipes.php?go=1</a><br><a href="https://sede.asturias.es/legislacion-consolidada">https://sede.asturias.es/legislacion-consolidada</a> |
| 78. Responses   | Management                    | Action Plans and Management                                                   | Number of National Fishing Regulations                                                                                                                                        | Societal            | <a href="https://eur-lex.europa.eu/">https://eur-lex.europa.eu/</a><br><a href="https://www.mapama.gob.es/es/Biodiversity/temas/espacios-protegidos/red-natura-2000">https://www.mapama.gob.es/es/Biodiversity/temas/espacios-protegidos/red-natura-2000</a><br><a href="https://normativapesquera.wordpress.com/lex-espanola/caladeros">https://normativapesquera.wordpress.com/lex-espanola/caladeros</a><br><a href="https://www.mapama.gob.es/es/pesca/legislacion/Caladeronacional.aspx">https://www.mapama.gob.es/es/pesca/legislacion/Caladeronacional.aspx</a><br><a href="https://tematico.asturias.es/dgpesca/din/legipes.php?go=1">https://tematico.asturias.es/dgpesca/din/legipes.php?go=1</a><br><a href="https://sede.asturias.es/legislacion-consolidada">https://sede.asturias.es/legislacion-consolidada</a> |
| 79. Responses   | Management                    | Action Plans and Management                                                   | Number of European and International Fishing Regulations                                                                                                                      | Societal            | <a href="https://eur-lex.europa.eu/">https://eur-lex.europa.eu/</a><br><a href="https://www.mapama.gob.es/es/Biodiversity/temas/espacios-protegidos/red-natura-2000">https://www.mapama.gob.es/es/Biodiversity/temas/espacios-protegidos/red-natura-2000</a><br><a href="https://normativapesquera.wordpress.com/lex-espanola/caladeros">https://normativapesquera.wordpress.com/lex-espanola/caladeros</a><br><a href="https://www.mapama.gob.es/es/pesca/legislacion/Caladeronacional.aspx">https://www.mapama.gob.es/es/pesca/legislacion/Caladeronacional.aspx</a><br><a href="https://tematico.asturias.es/dgpesca/din/legipes.php?go=1">https://tematico.asturias.es/dgpesca/din/legipes.php?go=1</a><br><a href="https://sede.asturias.es/legislacion-consolidada">https://sede.asturias.es/legislacion-consolidada</a> |
| 80. Responses   | Management                    | Action Plans and Management                                                   | Number of captured bony fish species included in the Spanish Catalogue                                                                                                        | Societal            | <a href="#">Real Decreto 139/2011, de 4 de febrero, para el desarrollo del Listado de Especies Silvestres en Régimen de Protección Especial y del Catálogo Español de Especies Amenazadas.</a>                                                                                                                                                                                                                                                                                                                                                                                                                                                                                                                                                                                                                                 |

| DPSIR dimension | Class<br>(Integrated indices) | Type                        | Indicator                                                               | Value dimension | Data source                                                                                                                                                                                    |
|-----------------|-------------------------------|-----------------------------|-------------------------------------------------------------------------|-----------------|------------------------------------------------------------------------------------------------------------------------------------------------------------------------------------------------|
| 81. Responses   | Management                    | Action Plans and Management | Number of elasmobranchs fish species included in the Spanish Catalogue  | Societal        | <a href="#">Real Decreto 139/2011, de 4 de febrero, para el desarrollo del Listado de Especies Silvestres en Régimen de Protección Especial y del Catálogo Español de Especies Amenazadas.</a> |
| 82. Responses   | Management                    | Action Plans and Management | Number of captured molluscs species included in the Spanish Catalogue   | Societal        | <a href="#">Real Decreto 139/2011, de 4 de febrero, para el desarrollo del Listado de Especies Silvestres en Régimen de Protección Especial y del Catálogo Español de Especies Amenazadas.</a> |
| 83. Responses   | Management                    | Action Plans and Management | Number of captured arthropods species included in the Spanish Catalogue | Societal        | <a href="#">Real Decreto 139/2011, de 4 de febrero, para el desarrollo del Listado de Especies Silvestres en Régimen de Protección Especial y del Catálogo Español de Especies Amenazadas.</a> |
| 84. Responses   | Management                    | Action Plans and Management | Number of captured seaweed species included in the Spanish Catalogue    | Societal        | <a href="#">Real Decreto 139/2011, de 4 de febrero, para el desarrollo del Listado de Especies Silvestres en Régimen de Protección Especial y del Catálogo Español de Especies Amenazadas.</a> |
| 85. Responses   | Management                    | Action Plans and Management | Number of mammal species included in the Spanish Catalogue              | Societal        | <a href="#">Real Decreto 139/2011, de 4 de febrero, para el desarrollo del Listado de Especies Silvestres en Régimen de Protección Especial y del Catálogo Español de Especies Amenazadas.</a> |
| 86. Responses   | Management                    | Action Plans and Management | Number of fish species included in the Spanish Catalogue                | Societal        | <a href="#">Real Decreto 139/2011, de 4 de febrero, para el desarrollo del Listado de Especies Silvestres en Régimen de Protección Especial y del Catálogo Español de Especies Amenazadas.</a> |
| 87. Responses   | Management                    | Action Plans and Management | Number of seabird spp included in the Spanish Catalogue                 | Societal        | <a href="#">Real Decreto 139/2011, de 4 de febrero, para el desarrollo del Listado de Especies Silvestres en Régimen de Protección Especial y del Catálogo Español de Especies Amenazadas.</a> |
| 88. Responses   | Management                    | Action Plans and Management | Number of seabird species included in Catalogue of Asturias             | Societal        | <a href="#">C:\Archivos de programa\IECISA\invesDoc\iCache\1\001U000C8H0001.TIF (asturias.es)</a>                                                                                              |
| 89. Responses   | Management                    | Action Plans and Management | Number of turtle species included in the Spanish Catalogue              | Societal        | <a href="#">Real Decreto 139/2011, de 4 de febrero, para el desarrollo del Listado de Especies Silvestres en Régimen de Protección Especial y del Catálogo Español de Especies Amenazadas.</a> |

| DPSIR dimension | Class<br>(Integrated indices) | Type                        | Indicator                                                      | Value dimension | Data source                                                                                                                                                                                    |
|-----------------|-------------------------------|-----------------------------|----------------------------------------------------------------|-----------------|------------------------------------------------------------------------------------------------------------------------------------------------------------------------------------------------|
| 90. Responses   | Management                    | Action Plans and Management | Number of arthropods species included in the Spanish Catalogue | Societal        | <a href="#">Real Decreto 139/2011, de 4 de febrero, para el desarrollo del Listado de Especies Silvestres en Régimen de Protección Especial y del Catálogo Español de Especies Amenazadas.</a> |
| 91. Responses   | Management                    | Action Plans and Management | Number cnidarian spp included in the Spanish Catalogue         | Societal        | <a href="#">Real Decreto 139/2011, de 4 de febrero, para el desarrollo del Listado de Especies Silvestres en Régimen de Protección Especial y del Catálogo Español de Especies Amenazadas.</a> |

**Table S1.3.** DPSIR's dimensions of Galicia

| DPSIR dimension | Class<br>(Integrated indices) | Type                           | Indicator                                                               | Value dimension | Data source                                                                                                                                                                                                                                                                                                                                                                                                                                                                                                                                                                                                                       |
|-----------------|-------------------------------|--------------------------------|-------------------------------------------------------------------------|-----------------|-----------------------------------------------------------------------------------------------------------------------------------------------------------------------------------------------------------------------------------------------------------------------------------------------------------------------------------------------------------------------------------------------------------------------------------------------------------------------------------------------------------------------------------------------------------------------------------------------------------------------------------|
| 1. Drivers      | Cultural                      | Sea care dissemination         | Number of Museums, Centres of environmental education, research centres | Societal        | <a href="https://mar.xunta.gal/es">https://mar.xunta.gal/es</a><br><a href="https://museos.xunta.gal/es/mar-galicia">https://museos.xunta.gal/es/mar-galicia</a><br><a href="https://viajes.lavozdeg Galicia.es/lista/2018/08/12/diez-museos-gallegos-dedicados-mar/03071534095966690735631.htm#1">https://viajes.lavozdeg Galicia.es/lista/2018/08/12/diez-museos-gallegos-dedicados-mar/03071534095966690735631.htm#1</a><br><a href="https://hoxe.vigo.org/movemonos/m_mar.php?lang=cas#/">https://hoxe.vigo.org/movemonos/m_mar.php?lang=cas#/</a><br><a href="https://cetmar.org/nosotros/">https://cetmar.org/nosotros/</a> |
| 2. Drivers      | Economic                      | Total amount of income         | Total profit (€)                                                        | Societal        |                                                                                                                                                                                                                                                                                                                                                                                                                                                                                                                                                                                                                                   |
| 3. Drivers      | Economic                      | Seaweed sales income           | Seaweed net profit (€)                                                  | Societal        |                                                                                                                                                                                                                                                                                                                                                                                                                                                                                                                                                                                                                                   |
| 4. Drivers      | Economic                      | Bivalves sales income          | Bivalves net profit (€)                                                 | Societal        |                                                                                                                                                                                                                                                                                                                                                                                                                                                                                                                                                                                                                                   |
| 5. Drivers      | Economic                      | Cephalopods sales income       | Cephalopods profit (€)                                                  | Societal        |                                                                                                                                                                                                                                                                                                                                                                                                                                                                                                                                                                                                                                   |
| 6. Drivers      | Economic                      | Cnidarians sales income        | Cnidarians net profit (€)                                               | Societal        |                                                                                                                                                                                                                                                                                                                                                                                                                                                                                                                                                                                                                                   |
| 7. Drivers      | Economic                      | Crustacean sales income        | Crustaceans net profit (€)                                              | Societal        |                                                                                                                                                                                                                                                                                                                                                                                                                                                                                                                                                                                                                                   |
| 8. Drivers      | Economic                      | Echinoderms sales income       | Echinoderms net profit (€)                                              | Societal        |                                                                                                                                                                                                                                                                                                                                                                                                                                                                                                                                                                                                                                   |
| 9. Drivers      | Economic                      | Gastropods sales income        | Gastropods net profit (€)                                               | Societal        |                                                                                                                                                                                                                                                                                                                                                                                                                                                                                                                                                                                                                                   |
| 10. Drivers     | Economic                      | Fish sales income              | Fish net profit (€)                                                     | Societal        |                                                                                                                                                                                                                                                                                                                                                                                                                                                                                                                                                                                                                                   |
| 11. Drivers     | Economic                      | Polychaetes sales income       | Polychaetes net profit (€)                                              | Societal        |                                                                                                                                                                                                                                                                                                                                                                                                                                                                                                                                                                                                                                   |
| 12. Drivers     | Economic                      | Primary producers sales income | Primary producers net profit (€)                                        | Societal        |                                                                                                                                                                                                                                                                                                                                                                                                                                                                                                                                                                                                                                   |



| DPSIR dimension | Class<br>(Integrated indices) | Type                                      | Indicator                               | Value dimension | Data source |
|-----------------|-------------------------------|-------------------------------------------|-----------------------------------------|-----------------|-------------|
| 13. Drivers     | Economic                      | Filterers sales income                    | Filterers net profit (€)                | Societal        |             |
| 14. Drivers     | Economic                      | Detritivores sales income                 | Detritivores net profit (€)             | Societal        |             |
| 15. Drivers     | Economic                      | Herbivores sales income                   | Herbivores net profit (€)               | Societal        |             |
| 16. Drivers     | Economic                      | Omnivores 1 income                        | Omnivores 1 net profit (€)              | Societal        |             |
| 17. Drivers     | Economic                      | Omnivores 2 sales income                  | Omnivores 2 net profit (€)              | Societal        |             |
| 18. Drivers     | Economic                      | Carnivores 1 sales income                 | Carnivores 1 net profit (€)             | Societal        |             |
| 19. Drivers     | Economic                      | Carnivores 2 sales income                 | Carnivores 2 net profit (€)             | Societal        |             |
| 20. Drivers     | Economic                      | Carnivores 3 sales income                 | Carnivores 3 net profit (€)             | Societal        |             |
| 21. Drivers     | Economic                      | Top predators sales income                | Top predators net profit (€)            | Societal        |             |
| 22. Drivers     | Economic                      | Reef spp sales income                     | Reef spp net profit (€)                 | Societal        |             |
| 23. Drivers     | Economic                      | Bathymersal spp sales income              | Bathymersal net profit (€)              | Societal        |             |
| 24. Drivers     | Economic                      | Pelagic spp sales income                  | Pelagic net profit (€)                  | Societal        |             |
| 25. Drivers     | Economic                      | Benthic-neritic-demersal spp sales income | Benthic-neritic-demersal net profit (€) | Societal        |             |
| 26. Drivers     | Economic                      | Benthic spp sales income                  | Benthic net profit(€)                   | Societal        |             |

| DPSIR dimension | Class<br>(Integrated indices) | Type                                                        | Indicator                                                                     | Value dimension | Data source                                                                                                                                                                                                                                                       |
|-----------------|-------------------------------|-------------------------------------------------------------|-------------------------------------------------------------------------------|-----------------|-------------------------------------------------------------------------------------------------------------------------------------------------------------------------------------------------------------------------------------------------------------------|
| 27. Drivers     | Economic                      | Benthopelagic spp sales income                              | Benthopelagic net profit (€)                                                  | Societal        |                                                                                                                                                                                                                                                                   |
| 28. Drivers     | Economic                      | Demersal spp sales income                                   | Demersal net profit (€)                                                       | Societal        |                                                                                                                                                                                                                                                                   |
| 29. Drivers     | Economic                      | Ingresos de venta de especies pelágicas                     | Ganancia neta pelágico (€)                                                    | Societal        |                                                                                                                                                                                                                                                                   |
| 30. Drivers     | Economic                      | Pelagic-neritic spp sales income                            | Pelagic-neritic net profit (€)                                                | Societal        |                                                                                                                                                                                                                                                                   |
| 31. Drivers     | Economic                      | Amount of fish consumed by the population                   | Per capita fish consumption (kg/hab)                                          | Societal        | <a href="https://www.mapa.gob.es/es/alimentacion/temas/consumo-tendencias/panel-de-consumo-alimentario/series-anuales/default.aspx">https://www.mapa.gob.es/es/alimentacion/temas/consumo-tendencias/panel-de-consumo-alimentario/series-anuales/default.aspx</a> |
| 32. Drivers     | Economic                      | Amount of money spent by the population on fish consumption | Fish per capita spending (€/hab)                                              | Societal        | <a href="https://www.mapa.gob.es/es/alimentacion/temas/consumo-tendencias/panel-de-consumo-alimentario/series-anuales/default.aspx">https://www.mapa.gob.es/es/alimentacion/temas/consumo-tendencias/panel-de-consumo-alimentario/series-anuales/default.aspx</a> |
| 33. Drivers     | Demographic                   | Human population density                                    | Population (n° hab/yr)                                                        | Societal        | <a href="https://www.ine.es/jaxiT3/Tabla.htm?t=31304">https://www.ine.es/jaxiT3/Tabla.htm?t=31304</a>                                                                                                                                                             |
| 34. Pressures   | Overexploitation              | Development of Industrial fishing gear                      | N° industrial vessels                                                         | Societal        | <a href="https://www.ige.eu/web/mostrar_actividade_estadistica.jsp?idioma=gl&amp;codigo=0301004">https://www.ige.eu/web/mostrar_actividade_estadistica.jsp?idioma=gl&amp;codigo=0301004</a>                                                                       |
| 35. Pressures   | Overexploitation              | Development of Industrial fishing gear                      | Gross tonnage of industrial vessels                                           | Societal        | <a href="https://www.ige.eu/web/mostrar_actividade_estadistica.jsp?idioma=gl&amp;codigo=0301004">https://www.ige.eu/web/mostrar_actividade_estadistica.jsp?idioma=gl&amp;codigo=0301004</a>                                                                       |
| 36. Pressures   | Overexploitation              | Development of Industrial fishing gear                      | Total power of industrial fisheries vessels (kW)                              | Societal        | <a href="https://www.ige.eu/web/mostrar_actividade_estadistica.jsp?idioma=gl&amp;codigo=0301004">https://www.ige.eu/web/mostrar_actividade_estadistica.jsp?idioma=gl&amp;codigo=0301004</a>                                                                       |
| 37. Pressures   | Land use change               | Transformation of coastal ecosystem                         | Number of plots built per property                                            | Societal        | <a href="https://www.catastro.meh.es/esp/estadistica_1.asp">https://www.catastro.meh.es/esp/estadistica_1.asp</a>                                                                                                                                                 |
| 38. State       | Biodiversity loss             | Exploited marine biodiversity                               | Number of spp of captured fish in IUCN red list (NT, VU, EN o CR) IUCN Global | Biodiversity    | <a href="https://www.iucnredlist.org/">https://www.iucnredlist.org/</a>                                                                                                                                                                                           |

| DPSIR dimension | Class<br>(Integrated indices) | Type                          | Indicator                                                                              | Value dimension | Data source                                                             |
|-----------------|-------------------------------|-------------------------------|----------------------------------------------------------------------------------------|-----------------|-------------------------------------------------------------------------|
| 39. State       | Biodiversity loss             | Exploited marine biodiversity | Number of spp of captured bony fish in IUCN red list (NT, VU, EN o CR) Europe          | Biodiversity    | <a href="https://www.iucnredlist.org/">https://www.iucnredlist.org/</a> |
| 40. State       | Biodiversity loss             | Exploited marine biodiversity | Number of spp of captured elasmobranchs fish in IUCN red list (NT, VU, EN o CR) Global | Biodiversity    | <a href="https://www.iucnredlist.org/">https://www.iucnredlist.org/</a> |
| 41. State       | Biodiversity loss             | Exploited marine biodiversity | Number of spp of captured elasmobranchs fish in IUCN red list (NT, VU, EN o CR) Europe | Biodiversity    | <a href="https://www.iucnredlist.org/">https://www.iucnredlist.org/</a> |
| 42. State       | Biodiversity loss             | Exploited marine biodiversity | Number of spp of captured molluscs in IUCN red list (NT, VU, EN o CR) Global           | Biodiversity    | <a href="https://www.iucnredlist.org/">https://www.iucnredlist.org/</a> |
| 43. State       | Biodiversity loss             | Exploited marine biodiversity | Number of spp of captured molluscs in IUCN red list (NT, VU, EN o CR) Europe           | Biodiversity    | <a href="https://www.iucnredlist.org/">https://www.iucnredlist.org/</a> |
| 44. State       | Biodiversity loss             | Exploited marine biodiversity | Number of spp of captured arthropods in IUCN red list (NT, VU, EN o CR) Global         | Biodiversity    | <a href="https://www.iucnredlist.org/">https://www.iucnredlist.org/</a> |
| 45. State       | Biodiversity loss             | Exploited marine biodiversity | Number of spp of captured arthropods in IUCN red list (NT, VU, EN o CR) Europe         | Biodiversity    | <a href="https://www.iucnredlist.org/">https://www.iucnredlist.org/</a> |

| DPSIR dimension | Class<br>(Integrated indices) | Type                          | Indicator                                                                   | Value dimension | Data source                                                             |
|-----------------|-------------------------------|-------------------------------|-----------------------------------------------------------------------------|-----------------|-------------------------------------------------------------------------|
| 46. State       | Biodiversity loss             | Exploited marine biodiversity | Number of spp of captured seaweed in IUCN red list (NT, VU, EN o CR) Global | Biodiversity    | <a href="https://www.iucnredlist.org/">https://www.iucnredlist.org/</a> |
| 47. State       | Biodiversity loss             | Exploited marine biodiversity | Number of spp of captured seaweed in IUCN red list (NT, VU, EN o CR) Europe | Biodiversity    | <a href="https://www.iucnredlist.org/">https://www.iucnredlist.org/</a> |
| 48. State       | Biodiversity loss             | Exploited marine biodiversity | Number of other spp captured in IUCN red list (NT, VU, EN o CR) Global      | Biodiversity    | <a href="https://www.iucnredlist.org/">https://www.iucnredlist.org/</a> |
| 49. State       | Biodiversity loss             | Exploited marine biodiversity | Number of other spp captured in IUCN red list (NT, VU, EN o CR) Europe      | Biodiversity    | <a href="https://www.iucnredlist.org/">https://www.iucnredlist.org/</a> |
| 50. State       | Biodiversity loss             | Jeopardized biodiversity      | Number of cetaceans in IUCN red list (NT, VU, EN o CR) Global               | Biodiversity    | <a href="https://www.iucnredlist.org/">https://www.iucnredlist.org/</a> |
| 51. State       | Biodiversity loss             | Jeopardized biodiversity      | Number of cetaceans in IUCN red list (NT, VU, EN o CR) Europe               | Biodiversity    | <a href="https://www.iucnredlist.org/">https://www.iucnredlist.org/</a> |
| 52. State       | Biodiversity loss             | Jeopardized biodiversity      | Number of seabirds in IUCN red list (NT, VU, EN o CR) Global                | Biodiversity    | <a href="https://www.iucnredlist.org/">https://www.iucnredlist.org/</a> |

| DPSIR dimension | Class<br>(Integrated indices) | Type                     | Indicator                                                              | Value dimension | Data source                                                             |
|-----------------|-------------------------------|--------------------------|------------------------------------------------------------------------|-----------------|-------------------------------------------------------------------------|
| 53. State       | Biodiversity loss             | Jeopardized biodiversity | Number of seabirds in IUCN red list (NT, VU, EN o CR) Europe           | Biodiversity    | <a href="https://www.iucnredlist.org/">https://www.iucnredlist.org/</a> |
| 54. State       | Biodiversity loss             | Jeopardized biodiversity | Number of turtles in IUCN red list (NT, VU, EN o CR) Global            | Biodiversity    | <a href="https://www.iucnredlist.org/">https://www.iucnredlist.org/</a> |
| 55. State       | Biodiversity loss             | Jeopardized biodiversity | Number of turtles in IUCN red list (NT, VU, EN o CR) Europe            | Biodiversity    | <a href="https://www.iucnredlist.org/">https://www.iucnredlist.org/</a> |
| 56. State       | Biodiversity loss             | Jeopardized biodiversity | Number of not fisheries fish in IUCN red list (NT, VU, EN o CR) Global | Biodiversity    | <a href="https://www.iucnredlist.org/">https://www.iucnredlist.org/</a> |
| 57. State       | Biodiversity loss             | Jeopardized biodiversity | Number of not fisheries fish in IUCN red list (NT, VU, EN o CR) Europe | Biodiversity    | <a href="https://www.iucnredlist.org/">https://www.iucnredlist.org/</a> |
| 58. State       | Biodiversity loss             | Jeopardized biodiversity | Number of cnidarians in IUCN red list (NT, VU, EN o CR) Global         | Biodiversity    | <a href="https://www.iucnredlist.org/">https://www.iucnredlist.org/</a> |
| 59. State       | Biodiversity loss             | Jeopardized biodiversity | Number of cnidarians in IUCN red list (NT, VU, EN o CR) Europe         | Biodiversity    | <a href="https://www.iucnredlist.org/">https://www.iucnredlist.org/</a> |

| DPSIR dimension | Class<br>(Integrated indices)    | Type                                                                                                             | Indicator                                                                  | Value dimension                   | Data source                                                                                                                                                                                                                                                                                                                                                                                                                                                                                                                                                                                                                                                                                                                                                                                                                                                                                                                                                                                                                                                                                                                                                                                                                                                                                                                                                                                           |
|-----------------|----------------------------------|------------------------------------------------------------------------------------------------------------------|----------------------------------------------------------------------------|-----------------------------------|-------------------------------------------------------------------------------------------------------------------------------------------------------------------------------------------------------------------------------------------------------------------------------------------------------------------------------------------------------------------------------------------------------------------------------------------------------------------------------------------------------------------------------------------------------------------------------------------------------------------------------------------------------------------------------------------------------------------------------------------------------------------------------------------------------------------------------------------------------------------------------------------------------------------------------------------------------------------------------------------------------------------------------------------------------------------------------------------------------------------------------------------------------------------------------------------------------------------------------------------------------------------------------------------------------------------------------------------------------------------------------------------------------|
| 60. State       | Biodiversity loss                | Exploited marine biodiversity                                                                                    | Richness of captured species                                               | Biodiversity                      | *estimated*                                                                                                                                                                                                                                                                                                                                                                                                                                                                                                                                                                                                                                                                                                                                                                                                                                                                                                                                                                                                                                                                                                                                                                                                                                                                                                                                                                                           |
| 61. Impacts     | Provisioning Ecosystem service   | Animals for food. Evolution of total biomass of fisheries, including fish and shellfish species, expressed in kg | Total fisheries biomass for all groups (kg)                                | Material                          | <a href="https://www.ige.gal/igebdt/selector.jsp?COD=452&amp;paxina=001&amp;c=0301004">https://www.ige.gal/igebdt/selector.jsp?COD=452&amp;paxina=001&amp;c=0301004</a>                                                                                                                                                                                                                                                                                                                                                                                                                                                                                                                                                                                                                                                                                                                                                                                                                                                                                                                                                                                                                                                                                                                                                                                                                               |
| 62. Impacts     | Servicio ecosistémico regulación | Biological control of marine food web integrity                                                                  | Primary productivity required (PPR)                                        | Ecosystem and habitat maintenance | Cálculo con nuestros indicadores a partir de Pauly, D, Christensen, V. 1995. Primary production required to sustain global fisheries. Nature 374: 255–257                                                                                                                                                                                                                                                                                                                                                                                                                                                                                                                                                                                                                                                                                                                                                                                                                                                                                                                                                                                                                                                                                                                                                                                                                                             |
| 63. Impacts     | Servicio ecosistémico regulación | Biological control of marine food web integrity                                                                  | Marine Trophic Index (MTI).                                                | Ecosystem and habitat maintenance | Cálculo con nuestros indicadores a partir de Pauly, D., & Watson, R. 2005. Background and interpretation of the 'Marine Trophic Index' as a measure of biodiversity. Philosophical Transactions of the Royal Society B: Biological Sciences, 360(1454), 415-423. doi:10.1098/rstb.2004.1597                                                                                                                                                                                                                                                                                                                                                                                                                                                                                                                                                                                                                                                                                                                                                                                                                                                                                                                                                                                                                                                                                                           |
| 64. Impacts     | Cultural ecosystem service       | Number of diving centers and whale watching companies                                                            | Temporal trend of the number of diving centers and whalewatching companies | Societal                          | <a href="http://www.buceo.net/">http://www.buceo.net/</a> <a href="http://www.baysub.com">www.baysub.com</a><br><a href="https://buceofinisterre.com/es/">https://buceofinisterre.com/es/</a><br><a href="https://www.buceogalicia.com/">https://www.buceogalicia.com/</a><br><a href="https://buceoislascies.es/">https://buceoislascies.es/</a> <a href="https://buceomalpica.com/">https://buceomalpica.com/</a><br><a href="https://www.buceoriasbaixas.com/">https://www.buceoriasbaixas.com/</a><br><a href="http://www.buceowayuu.es/">http://www.buceowayuu.es/</a><br><a href="http://buceocostalugo.es/">http://buceocostalugo.es/</a><br><a href="https://www.capitandiver.com/">https://www.capitandiver.com/</a><br><a href="https://maremasma.com/">https://maremasma.com/</a><br><a href="https://mergullocompstela.com/">https://mergullocompstela.com/</a><br><a href="https://mergulloviveiro.com/">https://mergulloviveiro.com/</a> <a href="https://www.nauga.es/">https://www.nauga.es/</a><br><a href="http://buceoolasalada.com/">http://buceoolasalada.com/</a><br><a href="https://www.facebook.com/buceo.ollodomar/">https://www.facebook.com/buceo.ollodomar/</a><br><a href="https://www.portosub.es/">https://www.portosub.es/</a><br><a href="http://www.ciesub.com/">http://www.ciesub.com/</a><br><a href="http://www.hydronauta.com/">http://www.hydronauta.com/</a> |

| DPSIR dimension | Class (Integrated indices) | Type                                                                                                                                        | Indicator                                                                              | Value dimension           | Data source                                                                                                                                                                                                                                                                                                                                                                                                                                                                                                                                                                                                                                                                                                                                                                                                                                                                                                                                                                                                                                                                                                                                                                                                                                                                                                                                                                                                                                                                                                                                                               |
|-----------------|----------------------------|---------------------------------------------------------------------------------------------------------------------------------------------|----------------------------------------------------------------------------------------|---------------------------|---------------------------------------------------------------------------------------------------------------------------------------------------------------------------------------------------------------------------------------------------------------------------------------------------------------------------------------------------------------------------------------------------------------------------------------------------------------------------------------------------------------------------------------------------------------------------------------------------------------------------------------------------------------------------------------------------------------------------------------------------------------------------------------------------------------------------------------------------------------------------------------------------------------------------------------------------------------------------------------------------------------------------------------------------------------------------------------------------------------------------------------------------------------------------------------------------------------------------------------------------------------------------------------------------------------------------------------------------------------------------------------------------------------------------------------------------------------------------------------------------------------------------------------------------------------------------|
| 65. Impacts     | Cultural ecosystem service | Development of Artisanal fishing gear                                                                                                       | n° artisanal vessels                                                                   | Societal                  | <a href="https://www.mapama.gob.es/es/pesca/temas/">https://www.mapama.gob.es/es/pesca/temas/</a><br><a href="https://www.ige.eu/web/mostrar_actividade_estadistica.jsp?idioma=gl&amp;codigo=0301004">https://www.ige.eu/web/mostrar_actividade_estadistica.jsp?idioma=gl&amp;codigo=0301004</a>                                                                                                                                                                                                                                                                                                                                                                                                                                                                                                                                                                                                                                                                                                                                                                                                                                                                                                                                                                                                                                                                                                                                                                                                                                                                          |
| 66. Impacts     | Cultural ecosystem service | Development of Artisanal fishing gear                                                                                                       | Gross tonnage of artisanal vessels (GT)                                                | Societal                  | <a href="https://www.mapama.gob.es/es/pesca/temas/">https://www.mapama.gob.es/es/pesca/temas/</a><br><a href="https://www.ige.eu/web/mostrar_actividade_estadistica.jsp?idioma=gl&amp;codigo=0301004">https://www.ige.eu/web/mostrar_actividade_estadistica.jsp?idioma=gl&amp;codigo=0301004</a>                                                                                                                                                                                                                                                                                                                                                                                                                                                                                                                                                                                                                                                                                                                                                                                                                                                                                                                                                                                                                                                                                                                                                                                                                                                                          |
| 67. Impacts     | Cultural ecosystem service | Development of Artisanal fishing gear                                                                                                       | Total power of artisanal fisheries vessels (kW)                                        | Societal                  | <a href="https://www.mapama.gob.es/es/pesca/temas/">https://www.mapama.gob.es/es/pesca/temas/</a><br><a href="https://www.ige.eu/web/mostrar_actividade_estadistica.jsp?idioma=gl&amp;codigo=0301004">https://www.ige.eu/web/mostrar_actividade_estadistica.jsp?idioma=gl&amp;codigo=0301004</a>                                                                                                                                                                                                                                                                                                                                                                                                                                                                                                                                                                                                                                                                                                                                                                                                                                                                                                                                                                                                                                                                                                                                                                                                                                                                          |
| 68. Impacts     | Cultural ecosystem service | Number of Fish producer organizations, fishermen associations, business associations representative of the fisheries and aquaculture sector | Evolution of the number of professional fishermen organizations                        | Good social relationships | <a href="https://www.confrariasgalicia.org/">https://www.confrariasgalicia.org/</a><br><a href="https://mar.xunta.gal/es/o-mar/o-sector/confrarias-de-pescadores">https://mar.xunta.gal/es/o-mar/o-sector/confrarias-de-pescadores</a><br><a href="https://fpcppontevedra.gal/cofradias/">https://fpcppontevedra.gal/cofradias/</a><br><a href="https://fpcpacoruña.es/">https://fpcpacoruña.es/</a><br><a href="https://cofradiaslugo.com/es/">https://cofradiaslugo.com/es/</a>                                                                                                                                                                                                                                                                                                                                                                                                                                                                                                                                                                                                                                                                                                                                                                                                                                                                                                                                                                                                                                                                                         |
| 69. Impacts     | Cultural ecosystem service | Number of women who are active in this fishing world                                                                                        | Temporal trend of the number of women who are active in this fishing world             | Good social relationships | <a href="https://www.ige.eu/igebdt/selector.jsp?COD=466&amp;paxina=001&amp;c=0301004">https://www.ige.eu/igebdt/selector.jsp?COD=466&amp;paxina=001&amp;c=0301004</a><br><a href="http://www.sadei.es/es/portal.do?IDM=19&amp;NM=2">http://www.sadei.es/es/portal.do?IDM=19&amp;NM=2</a><br>Dirección Provincial del Instituto Social de la Marina (Tel. 985 32 72 00)<br><a href="https://www.ige.eu/igebdt/esqv.jsp?ruta=verTabla.jsp?OP=1&amp;B=1&amp;M=&amp;COD=5355&amp;R=2[all]&amp;C=1[2001]&amp;F=&amp;S=&amp;SCF=">https://www.ige.eu/igebdt/esqv.jsp?ruta=verTabla.jsp?OP=1&amp;B=1&amp;M=&amp;COD=5355&amp;R=2[all]&amp;C=1[2001]&amp;F=&amp;S=&amp;SCF=</a><br><a href="http://www.anmupesca.org/">http://www.anmupesca.org/</a><br><a href="https://www.mapa.gob.es/es/pesca/temas/red-mujeres/analisis_y_diagnosticos.aspx">https://www.mapa.gob.es/es/pesca/temas/red-mujeres/analisis_y_diagnosticos.aspx</a><br><a href="https://www.mapa.gob.es/es/pesca/temas/red-mujeres/otros_documentos.aspx">https://www.mapa.gob.es/es/pesca/temas/red-mujeres/otros_documentos.aspx</a><br><a href="https://www.mapa.gob.es/es/pesca/temas/red-mujeres/plan_de_igualdad_pesca.aspx">https://www.mapa.gob.es/es/pesca/temas/red-mujeres/plan_de_igualdad_pesca.aspx</a><br><a href="https://www.mapa.gob.es/es/pesca/temas/red-mujeres/DOSSIER%20EXPERIENCIAS_tcm30-285691.pdf">https://www.mapa.gob.es/es/pesca/temas/red-mujeres/DOSSIER%20EXPERIENCIAS_tcm30-285691.pdf</a><br><a href="http://akteaplatform.eu/?lang=es">http://akteaplatform.eu/?lang=es</a> |
| 70. Impacts     | Cultural ecosystem service | Number of women associations (REMSP)                                                                                                        | Evolution of the number of women fishermen associations                                | Good social relationships | <a href="https://www.mapa.gob.es/es/pesca/temas/red-mujeres/directorio.aspx">https://www.mapa.gob.es/es/pesca/temas/red-mujeres/directorio.aspx</a>                                                                                                                                                                                                                                                                                                                                                                                                                                                                                                                                                                                                                                                                                                                                                                                                                                                                                                                                                                                                                                                                                                                                                                                                                                                                                                                                                                                                                       |
| 71. Responses   | Conservation               | Development of marine protected areas                                                                                                       | Changes in the Natura 2000 Network Protected Area (km²)                                | Habitat maintenance       | <a href="https://www.natura2000.europa.eu/">Natura 2000 Network Viewer (europa.eu)</a>                                                                                                                                                                                                                                                                                                                                                                                                                                                                                                                                                                                                                                                                                                                                                                                                                                                                                                                                                                                                                                                                                                                                                                                                                                                                                                                                                                                                                                                                                    |
| 72. Responses   | Conservation               | Development of marine protected areas and species conservation plans                                                                        | Number of regulations for the creation of marine protected areas, regulation of marine | Habitat maintenance       | <a href="https://eur-lex.europa.eu/">https://eur-lex.europa.eu/</a><br><a href="https://www.mapama.gob.es/es/Biodiversity/temas/espacios-prottegidos/red-natura-2000">https://www.mapama.gob.es/es/Biodiversity/temas/espacios-prottegidos/red-natura-2000</a><br><a href="https://normativapesquera.wordpress.com/lex-espanola/caladeros">https://normativapesquera.wordpress.com/lex-espanola/caladeros</a><br><a href="https://www.mapama.gob.es/es/pesca/legislacion/Caladeronacional.aspx">https://www.mapama.gob.es/es/pesca/legislacion/Caladeronacional.aspx</a>                                                                                                                                                                                                                                                                                                                                                                                                                                                                                                                                                                                                                                                                                                                                                                                                                                                                                                                                                                                                  |

|  |  |  |                                                                                                    |  |                                                                                                                                                                                                                                                                                                                                                                                                                                                                                                                                                                                                                                                                                          |
|--|--|--|----------------------------------------------------------------------------------------------------|--|------------------------------------------------------------------------------------------------------------------------------------------------------------------------------------------------------------------------------------------------------------------------------------------------------------------------------------------------------------------------------------------------------------------------------------------------------------------------------------------------------------------------------------------------------------------------------------------------------------------------------------------------------------------------------------------|
|  |  |  | resources and plans<br>for the conservation<br>and recovery of<br>species at the<br>Regional level |  | <a href="https://www.pescadegalicia.gal/PlanesExp/index.htm">https://www.pescadegalicia.gal/PlanesExp/index.htm</a><br><a href="https://www.lex.gal/galilex?p_p_id=galilex_WAR_galilexportlet&amp;p_p_lifecycle=1&amp;p_p_state=normal&amp;p_p_col_id=column-1&amp;p_p_col_count=2">https://www.lex.gal/galilex?p_p_id=galilex_WAR_galilexportlet&amp;p_p_lifecycle=1&amp;p_p_state=normal&amp;p_p_col_id=column-1&amp;p_p_col_count=2</a><br><a href="https://www.lex.gal/portada">https://www.lex.gal/portada</a><br><a href="https://www.xunta.gal/diario-oficial-galicia/portalPublicoHome.do?lang=es">https://www.xunta.gal/diario-oficial-galicia/portalPublicoHome.do?lang=es</a> |
|--|--|--|----------------------------------------------------------------------------------------------------|--|------------------------------------------------------------------------------------------------------------------------------------------------------------------------------------------------------------------------------------------------------------------------------------------------------------------------------------------------------------------------------------------------------------------------------------------------------------------------------------------------------------------------------------------------------------------------------------------------------------------------------------------------------------------------------------------|



| DPSIR dimension | Class (Integrated indices) | Type                                                                 | Indicator                                                                                                                                                                     | Value dimension     | Data source                                                                                                                                                                                                                                                                                                                                                                                                                                                                                                                                                                                                                                                                                                                                                                                                                                                                                                                                                                                                                                                                                                                                                                                                                                                        |
|-----------------|----------------------------|----------------------------------------------------------------------|-------------------------------------------------------------------------------------------------------------------------------------------------------------------------------|---------------------|--------------------------------------------------------------------------------------------------------------------------------------------------------------------------------------------------------------------------------------------------------------------------------------------------------------------------------------------------------------------------------------------------------------------------------------------------------------------------------------------------------------------------------------------------------------------------------------------------------------------------------------------------------------------------------------------------------------------------------------------------------------------------------------------------------------------------------------------------------------------------------------------------------------------------------------------------------------------------------------------------------------------------------------------------------------------------------------------------------------------------------------------------------------------------------------------------------------------------------------------------------------------|
| 73. Responses   | Conservation               | Development of marine protected areas and species conservation plans | Number of regulations for the creation of marine protected areas, regulation of marine resources and plans for the conservation and recovery of species at the National level | Habitat maintenance | <a href="https://eur-lex.europa.eu/">https://eur-lex.europa.eu/</a><br><a href="https://www.mapama.gob.es/es/Biodiversity/temas/espacios-protegidos/red-natura-2000">https://www.mapama.gob.es/es/Biodiversity/temas/espacios-protegidos/red-natura-2000</a><br><a href="https://normativapesquera.wordpress.com/lex-espanola/caladeros">https://normativapesquera.wordpress.com/lex-espanola/caladeros</a><br><a href="https://www.mapama.gob.es/es/pesca/legislacion/Caladeronacional.aspx">https://www.mapama.gob.es/es/pesca/legislacion/Caladeronacional.aspx</a><br><a href="https://www.pescadegalicia.gal/PlanesExp/index.htm">https://www.pescadegalicia.gal/PlanesExp/index.htm</a><br><a href="https://www.lex.gal/galilex?p_p_id=galilex_WAR_galilexportlet&amp;p_p_lifecycle=1&amp;p_p_state=normal&amp;p_p_col_id=column-1&amp;p_p_col_count=2">https://www.lex.gal/galilex?p_p_id=galilex_WAR_galilexportlet&amp;p_p_lifecycle=1&amp;p_p_state=normal&amp;p_p_col_id=column-1&amp;p_p_col_count=2</a><br><a href="https://www.lex.gal/portada">https://www.lex.gal/portada</a><br><a href="https://www.xunta.gal/diario-oficial-galicia/portalPublicoHome.do?lang=es">https://www.xunta.gal/diario-oficial-galicia/portalPublicoHome.do?lang=es</a> |
| 74. Responses   | Conservation               | Development of marine protected areas and species conservation plans | Number of regulations for the creation of marine protected areas, regulation of marine resources and plans for the conservation and recovery of species at the European level | Habitat maintenance | <a href="https://eur-lex.europa.eu/">https://eur-lex.europa.eu/</a><br><a href="https://www.mapama.gob.es/es/Biodiversity/temas/espacios-protegidos/red-natura-2000">https://www.mapama.gob.es/es/Biodiversity/temas/espacios-protegidos/red-natura-2000</a><br><a href="https://normativapesquera.wordpress.com/lex-espanola/caladeros">https://normativapesquera.wordpress.com/lex-espanola/caladeros</a><br><a href="https://www.mapama.gob.es/es/pesca/legislacion/Caladeronacional.aspx">https://www.mapama.gob.es/es/pesca/legislacion/Caladeronacional.aspx</a><br><a href="https://www.pescadegalicia.gal/PlanesExp/index.htm">https://www.pescadegalicia.gal/PlanesExp/index.htm</a><br><a href="https://www.lex.gal/galilex?p_p_id=galilex_WAR_galilexportlet&amp;p_p_lifecycle=1&amp;p_p_state=normal&amp;p_p_col_id=column-1&amp;p_p_col_count=2">https://www.lex.gal/galilex?p_p_id=galilex_WAR_galilexportlet&amp;p_p_lifecycle=1&amp;p_p_state=normal&amp;p_p_col_id=column-1&amp;p_p_col_count=2</a><br><a href="https://www.lex.gal/portada">https://www.lex.gal/portada</a><br><a href="https://www.xunta.gal/diario-oficial-galicia/portalPublicoHome.do?lang=es">https://www.xunta.gal/diario-oficial-galicia/portalPublicoHome.do?lang=es</a> |
| 75. Responses   | Conservation               | Development of marine protected areas                                | Changes in the total marine Protected Area (km <sup>2</sup> )                                                                                                                 | Habitat maintenance | <a href="https://eur-lex.europa.eu/">https://eur-lex.europa.eu/</a><br><a href="https://www.mapama.gob.es/es/Biodiversity/temas/espacios-protegidos/red-natura-2000">https://www.mapama.gob.es/es/Biodiversity/temas/espacios-protegidos/red-natura-2000</a><br><a href="https://normativapesquera.wordpress.com/lex-espanola/caladeros">https://normativapesquera.wordpress.com/lex-espanola/caladeros</a><br><a href="https://www.mapama.gob.es/es/pesca/legislacion/Caladeronacional.aspx">https://www.mapama.gob.es/es/pesca/legislacion/Caladeronacional.aspx</a><br><a href="https://www.pescadegalicia.gal/PlanesExp/index.htm">https://www.pescadegalicia.gal/PlanesExp/index.htm</a><br><a href="https://www.lex.gal/galilex?p_p_id=galilex_WAR_galilexportlet&amp;p_p_lifecycle=1&amp;p_p_state=normal&amp;p_p_col_id=column-1&amp;p_p_col_count=2">https://www.lex.gal/galilex?p_p_id=galilex_WAR_galilexportlet&amp;p_p_lifecycle=1&amp;p_p_state=normal&amp;p_p_col_id=column-1&amp;p_p_col_count=2</a><br><a href="https://www.lex.gal/portada">https://www.lex.gal/portada</a><br><a href="https://www.xunta.gal/diario-oficial-galicia/portalPublicoHome.do?lang=es">https://www.xunta.gal/diario-oficial-galicia/portalPublicoHome.do?lang=es</a> |
| 76. Responses   | Management                 | Action Plans and Management                                          | Number of Regional Fishing Regulations                                                                                                                                        | Societal            | <a href="https://eur-lex.europa.eu/">https://eur-lex.europa.eu/</a><br><a href="https://www.mapama.gob.es/es/Biodiversity/temas/espacios-protegidos/red-natura-2000">https://www.mapama.gob.es/es/Biodiversity/temas/espacios-protegidos/red-natura-2000</a><br><a href="https://normativapesquera.wordpress.com/lex-espanola/caladeros">https://normativapesquera.wordpress.com/lex-espanola/caladeros</a><br><a href="https://www.mapama.gob.es/es/pesca/legislacion/Caladeronacional.aspx">https://www.mapama.gob.es/es/pesca/legislacion/Caladeronacional.aspx</a><br><a href="https://www.pescadegalicia.gal/PlanesExp/index.htm">https://www.pescadegalicia.gal/PlanesExp/index.htm</a><br><a href="https://www.lex.gal/galilex?p_p_id=galilex_WAR_galilexportlet&amp;p_p_lifecycle=1&amp;p_p_state=normal&amp;p_p_col_id=column-1&amp;p_p_col_count=2">https://www.lex.gal/galilex?p_p_id=galilex_WAR_galilexportlet&amp;p_p_lifecycle=1&amp;p_p_state=normal&amp;p_p_col_id=column-1&amp;p_p_col_count=2</a><br><a href="https://www.lex.gal/portada">https://www.lex.gal/portada</a><br><a href="https://www.xunta.gal/diario-oficial-galicia/portalPublicoHome.do?lang=es">https://www.xunta.gal/diario-oficial-galicia/portalPublicoHome.do?lang=es</a> |
| 77. Responses   | Management                 | Action Plans and Management                                          | Number of National Fishing Regulations                                                                                                                                        | Societal            | <a href="https://eur-lex.europa.eu/">https://eur-lex.europa.eu/</a><br><a href="https://www.mapama.gob.es/es/Biodiversity/temas/espacios-protegidos/red-natura-2000">https://www.mapama.gob.es/es/Biodiversity/temas/espacios-protegidos/red-natura-2000</a><br><a href="https://normativapesquera.wordpress.com/lex-espanola/caladeros">https://normativapesquera.wordpress.com/lex-espanola/caladeros</a>                                                                                                                                                                                                                                                                                                                                                                                                                                                                                                                                                                                                                                                                                                                                                                                                                                                        |

| DPSIR dimension | Class<br>(Integrated indices) | Type                        | Indicator                                                                 | Value dimension | Data source                                                                                                                                                                                                                                                                                                                                                                                                                                                                                                                                                                                                                                                                                                                                                                                                                                                                                                                                                                                                                                                                                                                                                                                                                                                        |
|-----------------|-------------------------------|-----------------------------|---------------------------------------------------------------------------|-----------------|--------------------------------------------------------------------------------------------------------------------------------------------------------------------------------------------------------------------------------------------------------------------------------------------------------------------------------------------------------------------------------------------------------------------------------------------------------------------------------------------------------------------------------------------------------------------------------------------------------------------------------------------------------------------------------------------------------------------------------------------------------------------------------------------------------------------------------------------------------------------------------------------------------------------------------------------------------------------------------------------------------------------------------------------------------------------------------------------------------------------------------------------------------------------------------------------------------------------------------------------------------------------|
|                 |                               |                             |                                                                           |                 | <a href="https://www.mapama.gob.es/es/pesca/legislacion/Caladeronacional.aspx">https://www.mapama.gob.es/es/pesca/legislacion/Caladeronacional.aspx</a><br><a href="https://www.pescadegalicia.gal/PlanesExp/index.htm">https://www.pescadegalicia.gal/PlanesExp/index.htm</a><br><a href="https://www.lex.gal/galilex?p_p_id=galilex_WAR_galilexportlet&amp;p_p_lifecycle=1&amp;p_p_state=normal&amp;p_p_col_id=column-1&amp;p_p_col_count=2">https://www.lex.gal/galilex?p_p_id=galilex_WAR_galilexportlet&amp;p_p_lifecycle=1&amp;p_p_state=normal&amp;p_p_col_id=column-1&amp;p_p_col_count=2</a><br><a href="https://www.lex.gal/portada">https://www.lex.gal/portada</a><br><a href="https://www.xunta.gal/diario-oficial-galicia/portalPublicoHome.do?lang=es">https://www.xunta.gal/diario-oficial-galicia/portalPublicoHome.do?lang=es</a>                                                                                                                                                                                                                                                                                                                                                                                                                |
| 78. Responses   | Management                    | Action Plans and Management | Number of European and International Fishing Regulations                  | Societal        | <a href="https://eur-lex.europa.eu/">https://eur-lex.europa.eu/</a><br><a href="https://www.mapama.gob.es/es/Biodiversity/temas/espacios-protegidos/red-natura-2000">https://www.mapama.gob.es/es/Biodiversity/temas/espacios-protegidos/red-natura-2000</a><br><a href="https://normativapesquera.wordpress.com/lex-espanola/caladeros">https://normativapesquera.wordpress.com/lex-espanola/caladeros</a><br><a href="https://www.mapama.gob.es/es/pesca/legislacion/Caladeronacional.aspx">https://www.mapama.gob.es/es/pesca/legislacion/Caladeronacional.aspx</a><br><a href="https://www.pescadegalicia.gal/PlanesExp/index.htm">https://www.pescadegalicia.gal/PlanesExp/index.htm</a><br><a href="https://www.lex.gal/galilex?p_p_id=galilex_WAR_galilexportlet&amp;p_p_lifecycle=1&amp;p_p_state=normal&amp;p_p_col_id=column-1&amp;p_p_col_count=2">https://www.lex.gal/galilex?p_p_id=galilex_WAR_galilexportlet&amp;p_p_lifecycle=1&amp;p_p_state=normal&amp;p_p_col_id=column-1&amp;p_p_col_count=2</a><br><a href="https://www.lex.gal/portada">https://www.lex.gal/portada</a><br><a href="https://www.xunta.gal/diario-oficial-galicia/portalPublicoHome.do?lang=es">https://www.xunta.gal/diario-oficial-galicia/portalPublicoHome.do?lang=es</a> |
| 79. Responses   | Management                    | Action Plans and Management | Number of captured bony fish species included in the Spanish Catalogue    | Societal        | <a href="#">Real Decreto 139/2011, de 4 de febrero, para el desarrollo del Listado de Especies Silvestres en Régimen de Protección Especial y del Catálogo Español de Especies Amenazadas.</a>                                                                                                                                                                                                                                                                                                                                                                                                                                                                                                                                                                                                                                                                                                                                                                                                                                                                                                                                                                                                                                                                     |
| 80. Responses   | Management                    | Action Plans and Management | Number of captured bony fish species included Catalogue of Galicia        | Societal        | <a href="https://cmatv.xunta.gal/seccion-organizacion/c/DX_Conservacion_Natureza?content=Direccion_Xeral_Conservacion_Natureza/Biodiversity/seccion.html&amp;sub=Especies_ameazadas/">https://cmatv.xunta.gal/seccion-organizacion/c/DX_Conservacion_Natureza?content=Direccion_Xeral_Conservacion_Natureza/Biodiversity/seccion.html&amp;sub=Especies_ameazadas/</a>                                                                                                                                                                                                                                                                                                                                                                                                                                                                                                                                                                                                                                                                                                                                                                                                                                                                                              |
| 81. Responses   | Management                    | Action Plans and Management | Number of elasmobranchs fish species included in the Spanish Catalogue    | Societal        | <a href="#">Real Decreto 139/2011, de 4 de febrero, para el desarrollo del Listado de Especies Silvestres en Régimen de Protección Especial y del Catálogo Español de Especies Amenazadas.</a>                                                                                                                                                                                                                                                                                                                                                                                                                                                                                                                                                                                                                                                                                                                                                                                                                                                                                                                                                                                                                                                                     |
| 82. Responses   | Management                    | Action Plans and Management | Number of elasmobranchs fish species included in the Catalogue of Galicia | Societal        | <a href="https://cmatv.xunta.gal/seccion-organizacion/c/DX_Conservacion_Natureza?content=Direccion_Xeral_Conservacion_Natureza/Biodiversity/seccion.html&amp;sub=Especies_ameazadas/">https://cmatv.xunta.gal/seccion-organizacion/c/DX_Conservacion_Natureza?content=Direccion_Xeral_Conservacion_Natureza/Biodiversity/seccion.html&amp;sub=Especies_ameazadas/</a>                                                                                                                                                                                                                                                                                                                                                                                                                                                                                                                                                                                                                                                                                                                                                                                                                                                                                              |
| 83. Responses   | Management                    | Action Plans and Management | Number of captured molluscs species included in the Spanish Catalogue     | Societal        | <a href="#">Real Decreto 139/2011, de 4 de febrero, para el desarrollo del Listado de Especies Silvestres en Régimen de Protección Especial y del Catálogo Español de Especies Amenazadas.</a>                                                                                                                                                                                                                                                                                                                                                                                                                                                                                                                                                                                                                                                                                                                                                                                                                                                                                                                                                                                                                                                                     |

| DPSIR dimension | Class<br>(Integrated indices) | Type                        | Indicator                                                                 | Value dimension | Data source                                                                                                                                                                                                                                                                                                                                                   |
|-----------------|-------------------------------|-----------------------------|---------------------------------------------------------------------------|-----------------|---------------------------------------------------------------------------------------------------------------------------------------------------------------------------------------------------------------------------------------------------------------------------------------------------------------------------------------------------------------|
| 84. Responses   | Management                    | Action Plans and Management | Number of captured molluscs species included in the Catalogue of Galicia  | Societal        | <a href="https://cmatv.xunta.gal/seccion-organizacion/c/DX_Conseccion_Natureza?content=Direccion_Xeral_Conseccion_Natureza/Biodiversity/seccion.html&amp;sub=Especies_ameazadas/">https://cmatv.xunta.gal/seccion-organizacion/c/DX_Conseccion_Natureza?content=Direccion_Xeral_Conseccion_Natureza/Biodiversity/seccion.html&amp;sub=Especies_ameazadas/</a> |
| 85. Responses   | Management                    | Action Plans and Management | Number of captured arthropds species included in the Spanish Catalogue    | Societal        | <a href="#">Real Decreto 139/2011, de 4 de febrero, para el desarrollo del Listado de Especies Silvestres en Régimen de Protección Especial y del Catálogo Español de Especies Amenazadas.</a>                                                                                                                                                                |
| 86. Responses   | Management                    | Action Plans and Management | Number of captured arthropds species included in the Catalogue of Galicia | Societal        | <a href="https://cmatv.xunta.gal/seccion-organizacion/c/DX_Conseccion_Natureza?content=Direccion_Xeral_Conseccion_Natureza/Biodiversity/seccion.html&amp;sub=Especies_ameazadas/">https://cmatv.xunta.gal/seccion-organizacion/c/DX_Conseccion_Natureza?content=Direccion_Xeral_Conseccion_Natureza/Biodiversity/seccion.html&amp;sub=Especies_ameazadas/</a> |
| 87. Responses   | Management                    | Action Plans and Management | Number of captured seaweed species included in the Spanish Catalogue      | Societal        | <a href="#">Real Decreto 139/2011, de 4 de febrero, para el desarrollo del Listado de Especies Silvestres en Régimen de Protección Especial y del Catálogo Español de Especies Amenazadas.</a>                                                                                                                                                                |
| 88. Responses   | Management                    | Action Plans and Management | Number of captured seaweed species included in the Catalogue of Galicia   | Societal        | <a href="https://cmatv.xunta.gal/seccion-organizacion/c/DX_Conseccion_Natureza?content=Direccion_Xeral_Conseccion_Natureza/Biodiversity/seccion.html&amp;sub=Especies_ameazadas/">https://cmatv.xunta.gal/seccion-organizacion/c/DX_Conseccion_Natureza?content=Direccion_Xeral_Conseccion_Natureza/Biodiversity/seccion.html&amp;sub=Especies_ameazadas/</a> |
| 89. Responses   | Management                    | Action Plans and Management | Number of other captured species included in the Spanish Catalogue        | Societal        | <a href="#">Real Decreto 139/2011, de 4 de febrero, para el desarrollo del Listado de Especies Silvestres en Régimen de Protección Especial y del Catálogo Español de Especies Amenazadas.</a>                                                                                                                                                                |
| 90. Responses   | Management                    | Action Plans and Management | Number of other captured species included in the Catalogue of Galicia     | Societal        | <a href="https://cmatv.xunta.gal/seccion-organizacion/c/DX_Conseccion_Natureza?content=Direccion_Xeral_Conseccion_Natureza/Biodiversity/seccion.html&amp;sub=Especies_ameazadas/">https://cmatv.xunta.gal/seccion-organizacion/c/DX_Conseccion_Natureza?content=Direccion_Xeral_Conseccion_Natureza/Biodiversity/seccion.html&amp;sub=Especies_ameazadas/</a> |

| DPSIR dimension | Class<br>(Integrated indices) | Type                        | Indicator                                                              | Value dimension | Data source                                                                                                                                                                                                                                                                                                                                                           |
|-----------------|-------------------------------|-----------------------------|------------------------------------------------------------------------|-----------------|-----------------------------------------------------------------------------------------------------------------------------------------------------------------------------------------------------------------------------------------------------------------------------------------------------------------------------------------------------------------------|
| 91. Responses   | Management                    | Action Plans and Management | Number of mammal species included in the Spanish Catalogue             | Societal        | <a href="#">Real Decreto 139/2011, de 4 de febrero, para el desarrollo del Listado de Especies Silvestres en Régimen de Protección Especial y del Catálogo Español de Especies Amenazadas.</a>                                                                                                                                                                        |
| 92. Responses   | Management                    | Action Plans and Management | Number of mammal species included in the Catalogue of Galicia          | Societal        | <a href="https://cmatv.xunta.gal/seccion-organizacion/c/DX_Conservacion_Natureza?content=Direccion_Xeral_Conservacion_Natureza/Biodiversity/seccion.html&amp;sub=Especies_ameazadas/">https://cmatv.xunta.gal/seccion-organizacion/c/DX_Conservacion_Natureza?content=Direccion_Xeral_Conservacion_Natureza/Biodiversity/seccion.html&amp;sub=Especies_ameazadas/</a> |
| 93. Responses   | Management                    | Action Plans and Management | Number of seabird spp included in the Spanish Catalogue                | Societal        | <a href="#">Real Decreto 139/2011, de 4 de febrero, para el desarrollo del Listado de Especies Silvestres en Régimen de Protección Especial y del Catálogo Español de Especies Amenazadas.</a>                                                                                                                                                                        |
| 94. Responses   | Management                    | Action Plans and Management | Number of seabird spp included in the Catalogue of Galicia             | Societal        | <a href="https://www.iucnredlist.org/">https://www.iucnredlist.org/</a>                                                                                                                                                                                                                                                                                               |
| 95. Responses   | Management                    | Action Plans and Management | Number of turtle species included in the Spanish Catalogue             | Societal        | <a href="#">Real Decreto 139/2011, de 4 de febrero, para el desarrollo del Listado de Especies Silvestres en Régimen de Protección Especial y del Catálogo Español de Especies Amenazadas.</a>                                                                                                                                                                        |
| 96. Responses   | Management                    | Action Plans and Management | Number of turtle species included in the Catalogue of Galicia          | Societal        | <a href="https://cmatv.xunta.gal/seccion-organizacion/c/DX_Conservacion_Natureza?content=Direccion_Xeral_Conservacion_Natureza/Biodiversity/seccion.html&amp;sub=Especies_ameazadas/">https://cmatv.xunta.gal/seccion-organizacion/c/DX_Conservacion_Natureza?content=Direccion_Xeral_Conservacion_Natureza/Biodiversity/seccion.html&amp;sub=Especies_ameazadas/</a> |
| 97. Responses   | Management                    | Action Plans and Management | Number of non fisheries fish species included in the Spanish Catalogue | Societal        | <a href="#">Real Decreto 139/2011, de 4 de febrero, para el desarrollo del Listado de Especies Silvestres en Régimen de Protección Especial y del Catálogo Español de Especies Amenazadas.</a>                                                                                                                                                                        |

| DPSIR dimension | Class<br>(Integrated indices) | Type                        | Indicator                                                                 | Value dimension | Data source                                                                                                                                                                                                                                                                                                                                                     |
|-----------------|-------------------------------|-----------------------------|---------------------------------------------------------------------------|-----------------|-----------------------------------------------------------------------------------------------------------------------------------------------------------------------------------------------------------------------------------------------------------------------------------------------------------------------------------------------------------------|
| 98. Responses   | Management                    | Action Plans and Management | Number of non fisheries fish species included in the Catalogue of Galicia | Societal        | <a href="https://cmatv.xunta.gal/seccion-organizacion/c/DX_Conseccion_Natureza?content=Direccion_Xeral_Conseccion_Natureza/Biodiversitye/seccion.html&amp;sub=Especies_ameazadas/">https://cmatv.xunta.gal/seccion-organizacion/c/DX_Conseccion_Natureza?content=Direccion_Xeral_Conseccion_Natureza/Biodiversitye/seccion.html&amp;sub=Especies_ameazadas/</a> |
| 99. Responses   | Management                    | Action Plans and Management | Number of cnidarian species included in the Spanish Catalogue             | Societal        | <a href="#">Real Decreto 139/2011, de 4 de febrero, para el desarrollo del Listado de Especies Silvestres en Régimen de Protección Especial y del Catálogo Español de Especies Amenazadas.</a>                                                                                                                                                                  |
| 100. Responses  | Management                    | Action Plans and Management | Number of cnidarian species included in the Catalogue of Galicia          | Societal        | <a href="https://cmatv.xunta.gal/seccion-organizacion/c/DX_Conseccion_Natureza?content=Direccion_Xeral_Conseccion_Natureza/Biodiversitye/seccion.html&amp;sub=Especies_ameazadas/">https://cmatv.xunta.gal/seccion-organizacion/c/DX_Conseccion_Natureza?content=Direccion_Xeral_Conseccion_Natureza/Biodiversitye/seccion.html&amp;sub=Especies_ameazadas/</a> |



**File S2:** Summary of the regulations related with the conservation and management of fisheries in each study area. Contains nine Tables:

**Table S2.1.** Summary of the European Regulations on the management and regulation of fishing resources

**Table S2.2.** Summary of the Fisheries Regulations at the European level for Galicia and Asturias

**Table S2.3.** Summary of the Fisheries Regulations at Spanish level

**Table S2.4.** Summary of the Spanish Fisheries Regulations concerning the marine areas of Galicia and Asturias

**Table S2.5.** Summary of fishing Regulations for the Gulf of Cádiz

**Table S2.6.** Summary of fishing Regulations for the Mediterranean Sea

**Table S2.7.** Summary of the Regulations related with the management of the marine protected areas of Andalucía

**Table S2.8.** Summary of the Fisheries Regulations at Regional level: Galicia

**Table S2.9.** Summary of the Fisheries Regulations at Regional level: Asturias

**Table S2.1.** Summary of the European Regulations on the management and regulation of fishing resources

| Year | Law/Regulation/Recommendation                                                                                                                                                                                                                                                                                                   | Description                                                                                                     |
|------|---------------------------------------------------------------------------------------------------------------------------------------------------------------------------------------------------------------------------------------------------------------------------------------------------------------------------------|-----------------------------------------------------------------------------------------------------------------|
| 1983 | Reglamento (CEE) nº 2807/83                                                                                                                                                                                                                                                                                                     | the specific modalities for the recording of data relating to fish catches by Member States are defined.        |
| 1984 |                                                                                                                                                                                                                                                                                                                                 |                                                                                                                 |
| 1985 | Reglamento (CEE) nº 3561/85                                                                                                                                                                                                                                                                                                     | relating to information regarding inspections of fishing activities carried out by national control authorities |
| 1986 |                                                                                                                                                                                                                                                                                                                                 |                                                                                                                 |
| 1987 | Reglamento (CEE) nº 1382/87                                                                                                                                                                                                                                                                                                     | establishing specific rules on the inspection of fishing vessels.                                               |
| 1987 | Reglamento (CEE) nº 1381/87                                                                                                                                                                                                                                                                                                     | which establishes specific rules on signaling and documentation for fishing vessels.                            |
| 1988 |                                                                                                                                                                                                                                                                                                                                 |                                                                                                                 |
| 1989 |                                                                                                                                                                                                                                                                                                                                 |                                                                                                                 |
| 1990 |                                                                                                                                                                                                                                                                                                                                 |                                                                                                                 |
| 1991 |                                                                                                                                                                                                                                                                                                                                 |                                                                                                                 |
| 1992 | Reglamento (CEE) nº 3760/92                                                                                                                                                                                                                                                                                                     | establishing a community regime for fisheries and aquaculture                                                   |
| 1993 | Reglamento (CEE) núm. 2847/93                                                                                                                                                                                                                                                                                                   | which establishes a control regime applicable to the common fisheries policy.                                   |
| 1994 |                                                                                                                                                                                                                                                                                                                                 |                                                                                                                 |
| 1995 | COUNCIL DECISION of 7 December 1995 on the conclusion of an Agreement in the form of an exchange of letters concerning the provisional application of the Agreement on cooperation in the sea fisheries sector between the European Community and the Kingdom of Morocco initialled in Brussels on 13 November 1995 (95/540/EC) |                                                                                                                 |



| Year | Law/Regulation/Recommendation                                                                                                                                                                                                                                  | Description                                                                                                              |
|------|----------------------------------------------------------------------------------------------------------------------------------------------------------------------------------------------------------------------------------------------------------------|--------------------------------------------------------------------------------------------------------------------------|
| 1996 | Reglamento (CE) núm. 847/96                                                                                                                                                                                                                                    | which establishes additional conditions for the annual management of TACs and quotas.                                    |
| 1997 |                                                                                                                                                                                                                                                                |                                                                                                                          |
| 1998 | Reglamento (CE) nº 1449/98                                                                                                                                                                                                                                     | laying down provisions for the application of Regulation (EEC) No 2847/93 with regard to declarations of fishing effort. |
| 1998 | <a href="#">REGLAMENTO (CE) Nº 850/98 DEL CONSEJO de 30 de marzo de 1998 para la conservación de los recursos pesqueros a través de medidas técnicas de protección de los juveniles de organismos marinos</a>                                                  |                                                                                                                          |
| 1999 |                                                                                                                                                                                                                                                                |                                                                                                                          |
| 2000 |                                                                                                                                                                                                                                                                |                                                                                                                          |
| 2001 |                                                                                                                                                                                                                                                                |                                                                                                                          |
| 2002 |                                                                                                                                                                                                                                                                |                                                                                                                          |
| 2003 | <b>Reglamento (CE) 669/2003</b> y por el Reglamento (CE) 1368/2006, <i>por el que se establece un sistema de documentación de capturas de Dissostichus spp</i> (Róbalo de Profundidad), se ha aplicado el sistema de documentación de capturas de esta especie |                                                                                                                          |
| 2004 |                                                                                                                                                                                                                                                                |                                                                                                                          |
| 2005 | Reglamento (CE) nº 1281/2005                                                                                                                                                                                                                                   | on the management of fishing licenses and the minimum information they must contain.                                     |
| 2005 | Reglamento (CE) nº 768/2005                                                                                                                                                                                                                                    | which creates the Community Fisheries Control Agency                                                                     |
| 2005 | <a href="#">Council Regulation (EC) No 2166/2005 of 20 December 2005</a>                                                                                                                                                                                       | Norway lobster recovery plan                                                                                             |
| 2005 | Nuevo acuerdo Pesca UE Marruecos                                                                                                                                                                                                                               |                                                                                                                          |
| 2006 | REGLAMENTO (CE) nº 1966/2006                                                                                                                                                                                                                                   | on the electronic recording and transmission of fishing activities and on remote sensing means                           |

| Year | Law/Regulation/Recommendation                                                                                                                                                                                                                                                                  | Description                                                                                                                                        |
|------|------------------------------------------------------------------------------------------------------------------------------------------------------------------------------------------------------------------------------------------------------------------------------------------------|----------------------------------------------------------------------------------------------------------------------------------------------------|
| 2006 | <a href="#">Reglamento (CE) 1967/2006 del Consejo de 21 de diciembre de 2006, relativo a las medidas de gestión para la explotación sostenible de los recursos pesqueros en el Mar Mediterráneo, por el que se modifica el Reglamento (CEE) 2847/93 y se deroga el reglamento (CE) 1926/94</a> |                                                                                                                                                    |
| 2006 | <a href="#">Reglamento (CE) Nº 1198/2006 del Consejo, de 27 de julio de 2006 relativo al Fondo Europeo de Pesca</a>                                                                                                                                                                            |                                                                                                                                                    |
| 2007 | Reglamento (CE) nº 1542/2007                                                                                                                                                                                                                                                                   | on landing and weighing methods of herring, mackerel and horse mackerel                                                                            |
| 2007 | Reglamento (CE) nº 1566/2007                                                                                                                                                                                                                                                                   | on the electronic recording and transmission of fishing activities and on remote sensing means..                                                   |
| 2007 | <a href="#">Reglamento (CE) 1100/2007 del Consejo, de 18 de septiembre de 2007, por el que se establecen medidas para la recuperación de la población de anguila europea.</a>                                                                                                                  |                                                                                                                                                    |
| 2007 | <a href="#">Council Regulation (EC) No 1559/2007 of 17 December 2007 establishing a multi-annual recovery plan for bluefin tuna in the Eastern Atlantic and Mediterranean and amending Regulation (EC) No 520/2007</a>                                                                         |                                                                                                                                                    |
| 2007 | <a href="#">Reglamento (CE) Nº 498/2007 de la Comisión, de 26 de marzo de 2007 por el que se establecen las disposiciones de aplicación del Reglamento (CE) nº 1198/2006 del Consejo relativo al Fondo Europeo de Pesca</a>                                                                    |                                                                                                                                                    |
| 2008 | Reglamento (CE) nº 1077/2008                                                                                                                                                                                                                                                                   | on electronic recording and transmission of fishing activities and remote sensing                                                                  |
| 2008 | Reglamento (CE) nº 744/2008 del Consejo, de 24 de julio                                                                                                                                                                                                                                        | establish a temporary specific action to promote the restructuring of the fishing fleets of the European Community affected by the economic crisis |
| 2009 | Reglamento (CE) nº 1224/2009,                                                                                                                                                                                                                                                                  | A community control regime is established to ensure compliance with the rules of the common fisheries policy                                       |

| Year | Law/Regulation/Recommendation                                                                                                                                                                                                                                                                                                                                                                                                                                                                                                       | Description                                                                                                                                                                                                                                                                                                                                                                                                                                           |
|------|-------------------------------------------------------------------------------------------------------------------------------------------------------------------------------------------------------------------------------------------------------------------------------------------------------------------------------------------------------------------------------------------------------------------------------------------------------------------------------------------------------------------------------------|-------------------------------------------------------------------------------------------------------------------------------------------------------------------------------------------------------------------------------------------------------------------------------------------------------------------------------------------------------------------------------------------------------------------------------------------------------|
| 2009 | <a href="#">Council Regulation (EC) No 302/2009 of 6 April 2009 concerning a multiannual recovery plan for bluefin tuna in the eastern Atlantic and Mediterranean, amending Regulation (EC) No 43/2009 and repealing Regulation (EC) No 1559/2007</a>                                                                                                                                                                                                                                                                               |                                                                                                                                                                                                                                                                                                                                                                                                                                                       |
| 2009 | Reglamento (CE) 1100/2007 del Consejo, por el que se establecen medidas para la recuperación de la población de anguila europea                                                                                                                                                                                                                                                                                                                                                                                                     |                                                                                                                                                                                                                                                                                                                                                                                                                                                       |
| 2010 |                                                                                                                                                                                                                                                                                                                                                                                                                                                                                                                                     |                                                                                                                                                                                                                                                                                                                                                                                                                                                       |
| 2011 | Reglamento de Ejecución (UE) nº 404/2011                                                                                                                                                                                                                                                                                                                                                                                                                                                                                            | establishes a community control regime to guarantee compliance with the rules of the common fisheries policy.                                                                                                                                                                                                                                                                                                                                         |
| 2011 | Reglamento (UE) n.º 1343/2011 del Parlamento Europeo y del Consejo, de 13 de diciembre de 2011 sobre determinadas disposiciones aplicables a la pesca en la zona del Acuerdo CGPM (Comisión General de Pesca del Mediterráneo), cuyo objeto es establecer normas para la aplicación por parte de la Unión Europea de las medidas de conservación, gestión, explotación, control, comercialización y ejecución para los productos de la pesca y la acuicultura establecidas por la Comisión General de Pesca del Mediterráneo (CGPM) |                                                                                                                                                                                                                                                                                                                                                                                                                                                       |
| 2012 | <a href="#">Recomendación CGPM/36/2012/1, sobre las medidas adicionales para la explotación del coral rojo en la zona de la CGPM (documento en inglés).</a>                                                                                                                                                                                                                                                                                                                                                                         |                                                                                                                                                                                                                                                                                                                                                                                                                                                       |
| 2012 | <a href="#">Regulation (EU) No 500/2012 of 13 June 2012 amending Council Regulation (EC) No 302/2009 concerning a multiannual recovery plan for bluefin tuna in the eastern Atlantic and Mediterranean</a>                                                                                                                                                                                                                                                                                                                          |                                                                                                                                                                                                                                                                                                                                                                                                                                                       |
| 2012 | <a href="#">Decisión del Consejo, de 10 de julio de 2012 (2012/510/UE)</a>                                                                                                                                                                                                                                                                                                                                                                                                                                                          | sets out the position to be taken on behalf of the European Union in relation to the proposed amendments to Annexes II and III of the Protocol on Specially Protected Areas and Biological Diversity in the Mediterranean to the Convention for the Protection of the Marine Environment and the Mediterranean Coastal Region at the Seventeenth Meeting of the Contracting Parties (Paris, France, 8-10 February 2012) (OJ L 256 of 9/22/2012, p.1). |

| Year | Law/Regulation/Recommendation                                                                                                                                                                                                                                                                                   | Description                                                                                                                                                                                                                                 |
|------|-----------------------------------------------------------------------------------------------------------------------------------------------------------------------------------------------------------------------------------------------------------------------------------------------------------------|---------------------------------------------------------------------------------------------------------------------------------------------------------------------------------------------------------------------------------------------|
| 2012 | <a href="#">Recomendación GFCM/35/2011/2, sobre la explotación del coral rojo en la zona de aplicación de la CGPM (documento en inglés).</a>                                                                                                                                                                    |                                                                                                                                                                                                                                             |
| 2013 | Reglamento (UE) núm. 1380/2013, del Parlamento Europeo y del Consejo, de 11 de diciembre de 2013, sobre la Política Pesquera Común y las medidas adoptadas en estos planes de gestión deben ser compatibles con las medidas para la conservación y la explotación sostenible de los recursos biológicos marinos |                                                                                                                                                                                                                                             |
| 2013 | <a href="#">Reglamento (UE) nº 1303/2013 del Parlamento Europeo y del Consejo de 17 de diciembre de 2013</a>                                                                                                                                                                                                    |                                                                                                                                                                                                                                             |
| 2014 | Council Regulation (EU) No 1367/2014 of 15 December 2014 fixing for 2015 and 2016 the fishing opportunities for Union fishing vessels for certain deep-sea fish stocks                                                                                                                                          |                                                                                                                                                                                                                                             |
| 2014 | <a href="#">Reglamento (UE) nº 508/2014 del Parlamento Europeo y del Consejo de 15 de mayo de 2014</a>                                                                                                                                                                                                          | relating to the European Maritime and Fisheries Fund, and repealing Council Regulations (EC) No 2328/2003, (EC) 861/2006, (EC) 1198/2006 and (EC) 791/2007, and the Regulation (EU) 1255/2011 of the European Parliament and of the Council |
| 2014 | <a href="#">Reglamento Delegado (UE) nº 480/2014 de la Comisión de 3 de marzo de 2014</a>                                                                                                                                                                                                                       | includes measures that affect the EMFF Regulation                                                                                                                                                                                           |
| 2015 | <a href="#">Reglamento (UE) Nº 2102/2015 del Parlamento Europeo y del Consejo, de 28 de octubre de 2015 por el que se modifica el Reglamento (UE) no 1343/2011 sobre determinadas disposiciones aplicables a la pesca en la zona del Acuerdo CGPM (Comisión General de Pesca del Mediterráneo).</a>             |                                                                                                                                                                                                                                             |
| 2016 | <a href="#">Recomendación CGPM/40/2016/7, sobre la autorización del uso de vehículos de control remoto en el marco de programas de investigación científica sobre coral rojo (documento en inglés).</a>                                                                                                         |                                                                                                                                                                                                                                             |
| 2016 | <a href="#">Regulation (EU) No 2016/1627 of the European Parliament and of the Council of 14 September 2016 on a multiannual recovery plan for bluefin tuna in the eastern Atlantic and the Mediterranean, and repealing Council Regulation (EC) No 302/2009</a>                                                |                                                                                                                                                                                                                                             |
| 2016 | <a href="#">Recomendación 16-05 de ICCAT que sustituye a la Recomendación 13-04 y establece un plan de recuperación plurianual para el pez espada del Mediterráneo.</a>                                                                                                                                         |                                                                                                                                                                                                                                             |

| Year | Law/Regulation/Recommendation                                                                                                                                                                                                                                                                                | Description                                                                                       |
|------|--------------------------------------------------------------------------------------------------------------------------------------------------------------------------------------------------------------------------------------------------------------------------------------------------------------|---------------------------------------------------------------------------------------------------|
| 2016 | <a href="#">Resolución de 22 de diciembre de 2016, para aplicación de la Recomendación ICCAT16-05, que establece un plan de recuperación plurianual para el pez espada del Mediterráneo.</a>                                                                                                                 |                                                                                                   |
| 2016 | <a href="#">Recomendación 11-20 de ICCAT para enmendar la Recomendación 09-11 sobre el programa ICCAT de documentación de capturas de atún rojo.</a>                                                                                                                                                         |                                                                                                   |
| 2016 | <a href="#">Recomendación 15-20 de ICCAT para aclarar y enmendar aspectos del programa de documentación de capturas de atún rojo de ICCAT para facilitar la aplicación del sistema eBCD.</a>                                                                                                                 |                                                                                                   |
| 2017 | Reglamento (UE) 2017/1004 del Parlamento y del Consejo de 17 de mayo de 2017, establece un marco comunitario (en inglés, Data Collection Framework), para la recopilación, gestión y uso de los datos del sector pesquero y el apoyo al asesoramiento científico, en relación con la Política Pesquera Común |                                                                                                   |
| 2017 | REGLAMENTO DE EJECUCIÓN (UE) 2017/1345 DE LA COMISIÓN de 18 de julio de 2017 por el que se efectúan deducciones de las cuotas de pesca disponibles para determinadas poblaciones en 2017 debido a la sobrepesca practicada en años anteriores                                                                |                                                                                                   |
| 2017 | Recomendación CGPM/41/2017/5, por la que se establece un plan adaptativo regional para la explotación del coral rojo en el Mediterráneo (documento en inglés)                                                                                                                                                |                                                                                                   |
| 2018 | <b>Reglamento (UE) 2018/2025</b> del Consejo de 17 de diciembre de 2018                                                                                                                                                                                                                                      | the fishing opportunities in 2019 and 2020 for certain fish stocks of deep waters                 |
|      | <a href="https://eur-lex.europa.eu/legal-content/ES/TXT/PDF/?uri=CELEX:32018R2025&amp;from=en">https://eur-lex.europa.eu/legal-content/ES/TXT/PDF/?uri=CELEX:32018R2025&amp;from=en</a>                                                                                                                      |                                                                                                   |
| 2019 | <a href="#">Recomendación 18-02 de ICCAT que establece un Plan de Ordenación Plurianual para el atún rojo en el Atlántico Este y Mar Mediterráneo.</a>                                                                                                                                                       |                                                                                                   |
| 2019 | <b>Reglamento (UE) 2019/1241</b> del Parlamento Europeo y del Consejo de 20 de junio de 2019                                                                                                                                                                                                                 |                                                                                                   |
|      | <a href="https://www.boe.es/doue/2019/198/L00105-00201.pdf">https://www.boe.es/doue/2019/198/L00105-00201.pdf</a>                                                                                                                                                                                            | conservation of fishing resources and the protection of marine ecosystems with technical measures |

| Year | Law/Regulation/Recommendation                                                                                                                                                           | Description                                                                                                                                                                                      |
|------|-----------------------------------------------------------------------------------------------------------------------------------------------------------------------------------------|--------------------------------------------------------------------------------------------------------------------------------------------------------------------------------------------------|
| 2020 | Reglamento (UE) 2020/123 del Consejo, de 27 de enero de 2020                                                                                                                            | establishes, for 2020, the fishing opportunities for certain stocks and groups of fish stocks, applicable in Union waters and, in the case of Union fishing vessels, in certain non-Union waters |
|      | <a href="https://eur-lex.europa.eu/legal-content/ES/TXT/PDF/?uri=CELEX:32020R0123&amp;from=EN">https://eur-lex.europa.eu/legal-content/ES/TXT/PDF/?uri=CELEX:32020R0123&amp;from=EN</a> |                                                                                                                                                                                                  |

**Table S2.2.** Summary of the Fisheries Regulations at the European level for Galicia and Asturias

| Year | Law/Regulation/Recommendation                                                                                                                                                                                                                                                                                                   |
|------|---------------------------------------------------------------------------------------------------------------------------------------------------------------------------------------------------------------------------------------------------------------------------------------------------------------------------------|
| 1985 | Reglamento (CEE) nº 3561/85 de la Comisión, de 17 de diciembre de 1985, relativo a las informaciones referentes a las inspecciones de las actividades pesqueras efectuadas por las autoridades de control nacionales                                                                                                            |
| 1986 |                                                                                                                                                                                                                                                                                                                                 |
| 1987 | Reglamento (CEE) nº 1382/87 por el que se establecen normas concretas sobre la inspección de los barcos de pesca.                                                                                                                                                                                                               |
|      | Reglamento (CEE) nº 1381/87 por el que se establecen normas concretas sobre señalización y documentación de los barcos de pesca.                                                                                                                                                                                                |
| 1988 |                                                                                                                                                                                                                                                                                                                                 |
| 1989 |                                                                                                                                                                                                                                                                                                                                 |
| 1990 |                                                                                                                                                                                                                                                                                                                                 |
| 1991 |                                                                                                                                                                                                                                                                                                                                 |
| 1992 | Reglamento (CEE) nº 3760/92 por el que se establece un régimen comunitario de la pesca y la acuicultura (')                                                                                                                                                                                                                     |
|      | <a href="#">DIRECTIVA 92/43/CEE DEL CONSEJO</a>                                                                                                                                                                                                                                                                                 |
|      | <a href="#">Convenio para la Protección del Medio Ambiente Marino del Atlántico del Nordeste (OSPAR, 1992)</a>                                                                                                                                                                                                                  |
| 1993 | Reglamento (CEE) núm. 2847/93 por el que se establece un régimen de control aplicable a la política pesquera común.                                                                                                                                                                                                             |
| 1994 | <a href="#">Convención de las Naciones Unidas sobre el Derecho del Mar</a>                                                                                                                                                                                                                                                      |
| 1995 | COUNCIL DECISION of 7 December 1995 on the conclusion of an Agreement in the form of an exchange of letters concerning the provisional application of the Agreement on cooperation in the sea fisheries sector between the European Community and the Kingdom of Morocco initialled in Brussels on 13 November 1995 (95/540/EC) |
| 1996 | Reglamento (CE) núm. 847/96 por el que se establecen condiciones adicionales para la gestión anual de los TAC y las cuotas.                                                                                                                                                                                                     |
|      | Convenio de Londres                                                                                                                                                                                                                                                                                                             |

| Year | Law/Regulation/Recommendation                                                                                                                                                                                                                                                                                                                                                                                                                                      |
|------|--------------------------------------------------------------------------------------------------------------------------------------------------------------------------------------------------------------------------------------------------------------------------------------------------------------------------------------------------------------------------------------------------------------------------------------------------------------------|
| 1997 | <a href="#">Directiva 97/62/CE, de 27 octubre</a>                                                                                                                                                                                                                                                                                                                                                                                                                  |
| 1998 | Reglamento (CE) nº 1449/98 por el que se establecen disposiciones de aplicación del Reglamento (CEE) nº 2847/93 por lo que se refiere a las declaraciones del esfuerzo pesquero<br><a href="#">REGLAMENTO (CE) N o 850/98 DEL CONSEJO de 30 de marzo de 1998 para la conservación de los recursos pesqueros a través de medidas técnicas de protección de los juveniles de organismos marinos.</a>                                                                 |
| 1999 |                                                                                                                                                                                                                                                                                                                                                                                                                                                                    |
| 2000 |                                                                                                                                                                                                                                                                                                                                                                                                                                                                    |
| 2001 | <a href="#">Reglamento (UE) nº 1035/2001 del Consejo de 22 de mayo de 2001 por el que se establece un sistema de documentación para las capturas de Dissostichus spp (versión consolidada)</a>                                                                                                                                                                                                                                                                     |
| 2002 |                                                                                                                                                                                                                                                                                                                                                                                                                                                                    |
| 2003 | <a href="#">Reglamento (CE) nº 1984/2003 del Consejo, de 8 de abril de 2003, por el que se establece un régimen de control estadístico del atún rojo, el pez espada y el patudo en la Comunidad</a><br>Reglamento (CE) 669/2003 y por el Reglamento (CE) 1368/2006, <i>por el que se establece un sistema de documentación de capturas de Dissostichus spp</i> (Róbalo de Profundidad), se ha aplicado el sistema de documentación de capturas de esta especie     |
| 2004 | <a href="#">REGLAMENTO (CE) No 812/2004 DEL CONSEJO de 26 de abril de 2004 por el que se establecen medidas relativas a las capturas accidentales de cetáceos en la pesca y se modifica el Reglamento (CE) no 88/98</a><br><a href="#">REGLAMENTO (CE) No 2270/2004 DEL CONSEJO de 22 de diciembre de 2004 que fija para 2005 y 2006 las posibilidades de pesca de los buques pesqueros comunitarios para determinadas poblaciones de peces de aguas profundas</a> |
| 2005 | Reglamento (CE) nº 1281/2005 sobre la gestión de las licencias de pesca y la información mínima que deben contener.<br>Reglamento (CE) nº 768/2005 por el que se crea la Agencia Comunitaria de Control de la Pesca<br><a href="#">Council Regulation (EC) No 2166/2005 of 20 December 2005 plan recuperación norway lbster</a>                                                                                                                                    |



| Year | Law/Regulation/Recommendation                                                                                                                                                                                                                                                                  |
|------|------------------------------------------------------------------------------------------------------------------------------------------------------------------------------------------------------------------------------------------------------------------------------------------------|
| 2006 | Reglamento (CE) 669/2003 y por el Reglamento (CE) 1368/2006, por el que se establece un sistema de documentación de capturas de Dissostichus spp (Róbalo de Profundidad), se ha aplicado el sistema de documentación de capturas de esta especie                                               |
|      | REGLAMENTO (CE) nº 1966/2006 sobre el registro y la transmisión electrónicos de las actividades pesqueras y sobre los medios de teledetección                                                                                                                                                  |
|      | <a href="#">Reglamento (CE) 1967/2006 del Consejo de 21 de diciembre de 2006, relativo a las medidas de gestión para la explotación sostenible de los recursos pesqueros en el Mar Mediterráneo, por el que se modifica el Reglamento (CEE) 2847/93 y se deroga el reglamento (CE) 1926/94</a> |
|      | Reglamento (CE) n.º 1967/2006, del Consejo, de 21 de diciembre de 2006, ya citado, las medidas básicas de aplicación directa en la gestión de la pesca con artes fijos y menores en el Mediterráneo español                                                                                    |
| 2007 | <a href="#">REGLAMENTO (CE) No 643/2007 DEL CONSEJO de 11 de junio de 2007 por el que se modifica el Reglamento (CE) no 41/2007 en lo que se refiere al Plan de recuperación para el atún rojo recomendado por la Comisión Internacional para la Conservación del Atún Atlántico.</a>          |
|      | <a href="#">Reglamento (CE) 1100/2007 del Consejo, de 18 de septiembre de 2007, por el que se establecen medidas para la recuperación de la población de anguila europea.</a>                                                                                                                  |
|      | Reglamento (CE) nº 1542/2007 sobre métodos de desembarque y pesaje del arenque, la caballa y el jurel                                                                                                                                                                                          |
|      | Reglamento (CE) nº 1566/2007 sobre el registro y la transmisión electrónicos de las actividades pesqueras y sobre los medios de teledetección.                                                                                                                                                 |
|      | <a href="#">Council Regulation (EC) No 1559/2007 of 17 December 2007 establishing a multi-annual recovery plan for bluefin tuna in the Eastern Atlantic and Mediterranean and amending Regulation (EC) No 520/2007</a>                                                                         |
| 2008 | <a href="#">Reglamento (CE) 1005/2008, de 29 de septiembre de 2008, por el que se establece un sistema comunitario para prevenir, desalentar y eliminar la pesca ilegal, no declarada y no reglamentada.</a>                                                                                   |
|      | Reglamento (CE) nº 1077/2008 registro y la transmisión electrónicos de las actividades pesqueras y sobre los medios de teledetección,                                                                                                                                                          |

| Year | Law/Regulation/Recommendation                                                                                                                                                                                                                                                                                                                                                                                                                                                                                                                                                                                                                                                                                                                                                                                                                                                                                                                                                                                                                                                                                                                                                                                                                                                                                                                                                                                                                                                                                                                                                                 |
|------|-----------------------------------------------------------------------------------------------------------------------------------------------------------------------------------------------------------------------------------------------------------------------------------------------------------------------------------------------------------------------------------------------------------------------------------------------------------------------------------------------------------------------------------------------------------------------------------------------------------------------------------------------------------------------------------------------------------------------------------------------------------------------------------------------------------------------------------------------------------------------------------------------------------------------------------------------------------------------------------------------------------------------------------------------------------------------------------------------------------------------------------------------------------------------------------------------------------------------------------------------------------------------------------------------------------------------------------------------------------------------------------------------------------------------------------------------------------------------------------------------------------------------------------------------------------------------------------------------|
|      | <p>Reglamento (CE) nº 744/2008 del Consejo, de 24 de julio establecer una acción específica temporal para promover la reestructuración de las flotas pesqueras de la Comunidad Europea afectada por la crisis económica</p> <p>DIRECTIVA 2008/56/CE</p>                                                                                                                                                                                                                                                                                                                                                                                                                                                                                                                                                                                                                                                                                                                                                                                                                                                                                                                                                                                                                                                                                                                                                                                                                                                                                                                                       |
| 2009 | <p>Reglamento (CE) 1010/2009, de 22 de octubre de 2009, por el que se establecen normas de desarrollo del R(CE) 1005/2008 del Consejo, por el que se establece un sistema comunitario para prevenir, desalentar y eliminar la pesca ilegal, no declarada y no reglamentada.</p> <p><a href="#">Reglamento (CE) nº 1224/2009 del Consejo, de 20 de noviembre de 2009, por el que se establece un régimen comunitario de control para garantizar el cumplimiento de las normas de la política pesquera común, se modifican los Reglamentos (CE) nº 847/96, (CE) nº 2371/2002, (CE) nº 811/2004, (CE) nº 768/2005, (CE) nº 2115/2005, (CE) nº 2166/2005, (CE) nº 388/2006, (CE) nº 509/2007, (CE) nº 676/2007, (CE) nº 1098/2007, (CE) nº 1300/2008 y (CE) nº 1342/2008 y se derogan los Reglamentos (CEE) nº 2847/93, (CE) nº 1627/94 y (CE) nº 1966/2006.</a></p> <p><a href="#">Council Regulation (EC) No 302/2009 of 6 April 2009 concerning a multiannual recovery plan for bluefin tuna in the eastern Atlantic and Mediterranean, amending Regulation (EC) No 43/2009 and repealing Regulation (EC) No 1559/2007</a></p> <p><a href="#">REGLAMENTO (CE) No 302/2009 del Consejo de 6 de abril de 2009 por el que se establece un plan de recuperación plurianual para el atún rojo del Atlántico oriental y el Mediterráneo, se modifica el Reglamento (CE) n o 43/2009 y se deroga el Reglamento (CE) 1559/2007.</a></p> <p><a href="#">DIRECTIVA 2009/147/CE DEL PARLAMENTO EUROPEO Y DEL CONSEJO de 30 de noviembre de 2009 relativa a la conservación de las aves silvestres</a></p> |
| 2010 | <p><a href="#">Reglamento (UE) nº 640/2010 del Parlamento Europea y del Consejo de 7 de julio de 2010, por el que se establece un programa de documentación de capturas de atún rojo (Thunnus Thynnus) y se modifica el reglamento (CE) nº 1984/2003 del Consejo (versión consolidada)</a></p> <p><a href="#">Orden ARM/2077/2010, de 27 de julio, para el control de acceso de buques de terceros países, operaciones de transito, transbordo, importación y exportación de productos de la pesca para prevenir, desalentar y eliminar la pesca ilegal, no declarada y no reglamentada.</a></p>                                                                                                                                                                                                                                                                                                                                                                                                                                                                                                                                                                                                                                                                                                                                                                                                                                                                                                                                                                                              |

| Year | Law/Regulation/Recommendation                                                                                                                                                                                                                                                                                                                                                                                                                                                                                                       |
|------|-------------------------------------------------------------------------------------------------------------------------------------------------------------------------------------------------------------------------------------------------------------------------------------------------------------------------------------------------------------------------------------------------------------------------------------------------------------------------------------------------------------------------------------|
|      | ACCOBAMS                                                                                                                                                                                                                                                                                                                                                                                                                                                                                                                            |
| 2011 | <a href="#">Reglamento de Ejecución (UE) nº 404/2011 de la Comisión, de 8 de abril de 2011, que establece las normas de desarrollo del Reglamento (CE) nº 1224/2009 del Consejo por el que se establece un régimen comunitario de control para garantizar el cumplimiento de las normas de la política pesquera común.</a>                                                                                                                                                                                                          |
|      | Reglamento (UE) n.º 1343/2011 del Parlamento Europeo y del Consejo, de 13 de diciembre de 2011 sobre determinadas disposiciones aplicables a la pesca en la zona del Acuerdo CGPM (Comisión General de Pesca del Mediterráneo), cuyo objeto es establecer normas para la aplicación por parte de la Unión Europea de las medidas de conservación, gestión, explotación, control, comercialización y ejecución para los productos de la pesca y la acuicultura establecidas por la Comisión General de Pesca del Mediterráneo (CGPM) |
| 2012 | <a href="#">Recomendación CGPM/36/2012/1, sobre las medidas adicionales para la explotación del coral rojo en la zona de la CGPM (documento en inglés).</a>                                                                                                                                                                                                                                                                                                                                                                         |
|      | <a href="#">Recomendación GFCM/35/2011/2, sobre la explotación del coral rojo en la zona de aplicación de la CGPM (documento en inglés).</a>                                                                                                                                                                                                                                                                                                                                                                                        |
|      | <a href="#">Regulation (EU) No 500/2012 of 13 June 2012 amending Council Regulation (EC) No 302/2009 concerning a multiannual recovery plan for bluefin tuna in the eastern Atlantic and Mediterranean</a>                                                                                                                                                                                                                                                                                                                          |
| 2013 | <a href="#">Real Decreto 629/2013, de 2 de agosto, por el que se regula la pesca del coral rojo, su primera venta y el procedimiento de autorización para la obtención de licencias para su pesca.</a>                                                                                                                                                                                                                                                                                                                              |
|      | <a href="#">REGLAMENTO (UE) n ° 1380/2013 del Parlamento Europeo y del Consejo, de 11 de diciembre de 2013 , sobre la política pesquera común, por el que se modifican los Reglamentos (CE) n ° 1954/2003 y (CE) n ° 1224/2009 del Consejo, y se derogan los Reglamentos (CE) n ° 2371/2002 y (CE) n ° 639/2004 del Consejo y la Decisión 2004/585/CE del Consejo.</a>                                                                                                                                                              |
|      | <a href="#">REGLAMENTO (UE) No 605/2013 DEL PARLAMENTO EUROPEO Y DEL CONSEJO de 12 de junio de 2013 por el que se modifica el Reglamento (CE) no 1185/2003 sobre el cercenamiento de las aletas de los tiburones en los buques</a>                                                                                                                                                                                                                                                                                                  |

| Year | Law/Regulation/Recommendation                                                                                                                                                                                                                                                                                                                                                                                                                                                            |
|------|------------------------------------------------------------------------------------------------------------------------------------------------------------------------------------------------------------------------------------------------------------------------------------------------------------------------------------------------------------------------------------------------------------------------------------------------------------------------------------------|
| 2014 | <a href="#">REGLAMENTO (UE) No 1246/2014 DE LA COMISIÓN de 19 de noviembre de 2014 por el que se prohíbe la pesca de sable negro en aguas de la UE y aguas internacionales de las zonas V, VI, VII y XII por parte de los buques que enarbolan pabellón de España.</a>                                                                                                                                                                                                                   |
|      | <a href="#">REGLAMENTO DELEGADO (UE) No 1394/2014 DE LA COMISIÓN de 20 de octubre de 2014 por el que se establece un plan de descartes para determinadas pesquerías pelágicas en las aguas suroccidentales.</a>                                                                                                                                                                                                                                                                          |
|      | <a href="#">REGLAMENTO (UE) N o 43/2014 DEL CONSEJO de 20 de enero de 2014 por el que se establecen, para 2014, las posibilidades de pesca para determinadas poblaciones y grupos de poblaciones de peces, aplicables en aguas de la Unión y, en el caso de los buques de la Unión, en determinadas aguas no pertenecientes a la Unión.</a>                                                                                                                                              |
|      | <a href="#">Decisión de Ejecución del Consejo de 24 de marzo de 2014, por la que se establece una lista de terceros países no cooperantes en la lucha contra la pesca INDNR, de conformidad con el Reglamento (CE) nº 1005/ 2008 del Consejo por el que se establece un sistema comunitario para prevenir, desalentar y eliminar la pesca ilegal, no declarada y no reglamentada. (2014/170/UE)</a>                                                                                      |
|      | <a href="#">REGLAMENTO DELEGADO (UE) 2015/98 DE LA COMISIÓN de 18 de noviembre de 2014 relativo a la aplicación de las obligaciones internacionales de la Unión, tal como se contempla en el artículo 15, apartado 2, del Reglamento (UE) no 1380/2013 del Parlamento Europeo y del Consejo, en el marco del Convenio Internacional para la Conservación del Atún del Atlántico y el Convenio sobre la futura cooperación multilateral en los caladeros del Atlántico Noroccidental.</a> |
|      | Council Regulation (EU) No 1367/2014 of 15 December 2014 fixing for 2015 and 2016 the fishing opportunities for Union fishing vessels for certain deep-sea fish stocks                                                                                                                                                                                                                                                                                                                   |
|      | <a href="#">Reglamento 508/2014 relativo al Fondo Europeo Marítimo y de Pesca, y por el que se derogan los Reglamentos (CE) n o 2328/2003, (CE) n o 861/2006, (CE) n o 1198/2006 y (CE) n o 791/2007 del Consejo, y el Reglamento (UE) n o 1255/2011 del Parlamento Europeo y del Consejo</a>                                                                                                                                                                                            |
| 2015 | <a href="#">Directiva de Planificación espacial marina (2014/89/CE)</a>                                                                                                                                                                                                                                                                                                                                                                                                                  |
|      | <a href="#">Orden AAA/2139/2015, de 6 de octubre, por la que se convoca el procedimiento de autorización para la concesión de licencias de extracción y venta de coral rojo.</a>                                                                                                                                                                                                                                                                                                         |

| Year        | Law/Regulation/Recommendation                                                                                                                                                                                                                                                                                                                                                                           |
|-------------|---------------------------------------------------------------------------------------------------------------------------------------------------------------------------------------------------------------------------------------------------------------------------------------------------------------------------------------------------------------------------------------------------------|
|             | <a href="#">Reglamento (UE) 2015/704 de la Comisión, de 30 de abril de 2015, que modifica el Reglamento (CE) n° 1881/2006 por lo que respecta al contenido máximo de PCB no similares a las dioxinas en la mielga (<i>Squalus acanthias</i>) capturada en estado salvaje</a>                                                                                                                            |
| <b>2016</b> | <a href="#">Reglamento Delegado (UE) 2016/2377 DE LA COMISIÓN de 14 de octubre de 2016 que modifica el Reglamento Delegado (UE) n.o 1394/2014, por el que se establece un plan de descartes para determinadas pesquerías pelágicas en las aguas suroccidentales</a>                                                                                                                                     |
|             | <a href="#">Regulation (EU) No 2016/1627 of the European Parliament and of the Council of 14 September 2016 on a multiannual recovery plan for bluefin tuna in the eastern Atlantic and the Mediterranean, and repealing Council Regulation (EC) No 302/2009</a>                                                                                                                                        |
|             | <a href="#">Recomendación CGPM/40/2016/7, sobre la autorización del uso de vehículos de control remoto en el marco de programas de investigación científica sobre coral rojo (documento en inglés).</a>                                                                                                                                                                                                 |
|             | <a href="#">Recomendación 11-20 de ICCAT para enmendar la Recomendación 09-11 sobre el programa ICCAT de documentación de capturas de atún rojo.</a>                                                                                                                                                                                                                                                    |
|             | <a href="#">Recomendación 15-20 de ICCAT para aclarar y enmendar aspectos del programa de documentación de capturas de atún rojo de ICCAT para facilitar la aplicación del sistema eBCD.</a>                                                                                                                                                                                                            |
|             | <a href="#">REGLAMENTO (UE) 2016/72 DEL CONSEJO de 22 de enero de 2016 por el que se establecen, para 2016, las posibilidades de pesca para determinadas poblaciones y grupos de poblaciones de peces, aplicables en aguas de la Unión y, en el caso de los buques pesqueros de la Unión, en determinadas aguas no pertenecientes a la Unión, y por el que se modifica el Reglamento (UE) 2015/104.</a> |
|             | <a href="#">REGLAMENTO (UE) 2016/458 DEL CONSEJO de 30 de marzo de 2016 por el que se modifica el Reglamento (UE) 2016/72 en lo que respecta a determinadas posibilidades de pesca</a>                                                                                                                                                                                                                  |
| <b>2017</b> | <a href="#">REGLAMENTO DE EJECUCIÓN (UE) 2017/787 DE LA COMISIÓN de 8 de mayo de 2017 por el que se establece una talla mínima de referencia a efectos de conservación para el besugo en el océano Atlántico Nororiental.</a>                                                                                                                                                                           |
|             | Reglamento (UE) 2017/1004 del Parlamento y del Consejo de 17 de mayo de 2017, establece un marco comunitario (en inglés, Data Collection Framework), para la recopilación, gestión y uso de los datos del sector pesquero y el apoyo al asesoramiento científico, en relación con la Política Pesquera Común                                                                                            |

| Year | Law/Regulation/Recommendation                                                                                                                                                                                                                                                                                                                                                                                  |
|------|----------------------------------------------------------------------------------------------------------------------------------------------------------------------------------------------------------------------------------------------------------------------------------------------------------------------------------------------------------------------------------------------------------------|
|      | <p>REGLAMENTO DE EJECUCIÓN (UE) 2017/1345 DE LA COMISIÓN de 18 de julio de 2017 por el que se efectúan deducciones de las cuotas de pesca disponibles para determinadas poblaciones en 2017 debido a la sobrepesca practicada en años anteriores</p>                                                                                                                                                           |
|      | <p><a href="#">Decisión (UE) 2017/848</a></p>                                                                                                                                                                                                                                                                                                                                                                  |
|      | <p>DIRECTIVA (UE) 2017/845</p>                                                                                                                                                                                                                                                                                                                                                                                 |
|      | <p>Recomendación CGPM/41/2017/5, por la que se establece un plan adaptativo regional para la explotación del coral rojo en el Mediterráneo (documento en inglés)</p>                                                                                                                                                                                                                                           |
|      | <p><a href="#">REGLAMENTO (UE) 2017/127 DEL CONSEJO de 20 de enero de 2017 por el que se establecen, para 2017, las posibilidades de pesca para determinadas poblaciones y grupos de poblaciones de peces, aplicables en aguas de la Unión y, en el caso de los buques pesqueros de la Unión, en determinadas aguas no pertenecientes a la Unión.</a></p>                                                      |
| 2018 | <p><a href="#">Reglamento Delegado (UE) 2018/161 DE LA COMISIÓN de 23 de octubre de 2017 por el que se establece una exención de minimis a la obligación de desembarque para determinadas pesquerías de pequeños pelágicos en el mar Mediterráneo</a></p>                                                                                                                                                      |
|      | <p><a href="#">Reglamento Delegado (UE) 2018/188 DE LA COMISIÓN de 21 de noviembre de 2017 que modifica el Reglamento Delegado (UE) n.o 1394/2014, por el que se establece un plan de descartes para determinadas pesquerías pelágicas en las aguas suroccidentales</a></p>                                                                                                                                    |
|      | <p><a href="#">REGLAMENTO (UE) 2018/120 DEL CONSEJO de 23 de enero de 2018 por el que se establecen, para 2018, las posibilidades de pesca para determinadas poblaciones y grupos de poblaciones de peces, aplicables en aguas de la Unión y, en el caso de los buques pesqueros de la Unión, en determinadas aguas no pertenecientes a la Unión y se modifica el Reglamento (UE) 2017/127 del Consejo</a></p> |

| Year        | Law/Regulation/Recommendation                                                                                                                                                                                                                          |
|-------------|--------------------------------------------------------------------------------------------------------------------------------------------------------------------------------------------------------------------------------------------------------|
|             | Reglamento (UE) 2018/2025 del Consejo, de 17 de diciembre de 2018, por el que se fijan para los buques pesqueros de la Unión las posibilidades de pesca en 2019 y 2020 de determinadas poblaciones de peces de aguas profundas.                        |
| <b>2019</b> | Reglamento Delegado (UE) 2019/2239 de la Comisión de 1 de octubre de 2019 por el que se especifican los detalles de la obligación de desembarque en relación con determinadas pesquerías demersales en aguas noroccidentales para el período 2020-2021 |

**Table S2.3.** Summary of the Fisheries Regulations at Spanish level

| Year | Law/Regulation/Recommendation    | Description                                                                                                                                                                                                      |
|------|----------------------------------|------------------------------------------------------------------------------------------------------------------------------------------------------------------------------------------------------------------|
| 1980 | BOE-A-1980-7798                  | RD 681/1980 Se ordena la actividad pesquera nacional                                                                                                                                                             |
| 1981 | BOE-A-1981-25918                 | <a href="#">Orden de 15 de octubre de 1981 por la que se establecen los criterios generales de contingentación de caladeros ozonas de pesca.</a>                                                                 |
| 1982 |                                  |                                                                                                                                                                                                                  |
| 1983 |                                  |                                                                                                                                                                                                                  |
| 1984 | BOE-A-1984-4955                  | Orden de 16 de enero de 1984 por la que se regula la pesca con el arte de «palangre de superficie».                                                                                                              |
| 1984 | BOE-A-1985-226                   | Real Decreto 2349/1984, de 28 de noviembre, por el que se regula la pesca de «Cerco» en el caladero naciona                                                                                                      |
| 1984 | BOE-A-1984-17796                 | Orden de 2 de agosto de 1984 por la que se establece la talla mínima de la captura de la «cigala» en el caladero nacional.                                                                                       |
| 1985 |                                  |                                                                                                                                                                                                                  |
| 1986 |                                  |                                                                                                                                                                                                                  |
| 1987 |                                  |                                                                                                                                                                                                                  |
| 1988 | <a href="#">BOE-A-1988-18762</a> | Ley 22/1988, de 28 de julio, de Costas                                                                                                                                                                           |
| 1989 | BOE-A-1989-29127                 | Real Decreto 1471/1989, de 1 de diciembre, por el que se aprueba el Reglamento general para desarrollo y ejecución de la Ley 22/1988, de 28 de julio, de Costas Reglamento para la ejecución de la Ley de Costas |
| 1989 | BOE-A-1989-6881                  | Ley 4/1989 Ley de Conservacion de los Espacios Naturales y de la flora y fauna silvestres                                                                                                                        |
| 1989 | BOE-A-1989-2447                  | Orden de 30 de enero de 1989 sobre la realización de un censo de la flota pesquera operativa                                                                                                                     |
| 1989 | BOE-A-1989-5765                  | Orden de 20 de febrero de 1989 por la que se establece la talla mínima de captura de la «cigala» en el caladero nacional y la forma de efectuar su medición.                                                     |
| 1990 |                                  |                                                                                                                                                                                                                  |
| 1991 |                                  |                                                                                                                                                                                                                  |



| Year | Law/Regulation/Recommendation | Description                                                                                                                                                                                                                                                                                                                               |
|------|-------------------------------|-------------------------------------------------------------------------------------------------------------------------------------------------------------------------------------------------------------------------------------------------------------------------------------------------------------------------------------------|
| 1992 | BOE-A-1992-22411              | Real Decreto 1112/1992, de 18 de septiembre, por el que se modifica parcialmente el Reglamento General para desarrollo y ejecución de la Ley 22/1988, de 28 de julio, de Costas, aprobado por el Real Decreto 1471/1989, de 1 de diciembre                                                                                                |
| 1992 | BOE-A-1992-26986              | Ley 27/1992, de 24 de noviembre, de Puertos del Estado y de la Marina Mercante                                                                                                                                                                                                                                                            |
| 1993 | BOE-A-1993-31134              | Orden de 20 de diciembre de 1993 por la que se hacen públicas las relaciones de zonas de producción de moluscos y otros invertebrados marinos vivos en el litoral español                                                                                                                                                                 |
| 1994 | BOE-A-1994-18775              | Orden de 4 de agosto de 1994 por la que se modifican parcialmente algunos preceptos de la Orden de 27 de mayo de 1993, por la que se ordena la actividad pesquera de las flotas españolas que operan al amparo del Acuerdo sobre las relaciones en materia de pesca marítima entre la Comunidad Económica Europea y el Reino de Marruecos |
| 1994 | BOE-A-1994-11854              | Orden del 18 de Mayo de 1994 Se establecen criterios para el censo del congeladores de la zona NAFO                                                                                                                                                                                                                                       |
| 1995 | BOE-A-1995-24549              | Orden de 6 de noviembre de 1995 por la que se regula la actividad de la flota española dirigida al pez espada                                                                                                                                                                                                                             |
| 1995 | BOE-A-1995-8639               | <a href="#">Real Decreto 560/1995, de 7 de abril, por el que se establece las tallas mínimas de determinadas especies pesqueras.</a>                                                                                                                                                                                                      |
| 1996 | BOE-A-1996-26986              | <a href="#">Orden de 22 de noviembre de 1996 por la que se prohíbe la pesca de determinadas especies pelágicas con artes de arrastre.</a>                                                                                                                                                                                                 |
| 1997 | BOE-A-1997-22993              | Orden de 16 de octubre de 1997, por la que se modifica la Orden de 6 de noviembre de 1995, por la que se regula la actividad de la flota pesquera española dirigida al pez espada                                                                                                                                                         |

| Year | Law/Regulation/Recommendation   | Description                                                                                                                                                                                                                                                                           |
|------|---------------------------------|---------------------------------------------------------------------------------------------------------------------------------------------------------------------------------------------------------------------------------------------------------------------------------------|
| 1997 | BOE-A-1997-1960                 | Orden de 28 de enero de 1997 por la que se modifica la de 18 de mayo de 1994, por la que se establecen los criterios para la confección del censo de arrastreros congeladores que faenan en la zona de regulación de la Organización de la Pesca en el Atlántico Noroccidental (NAFO) |
| 1997 | BOE-A-1997-17137                | Orden de 23 de julio de 1997 por la que se crea la Comisión Ministerial de Información Administrativa del Ministerio de Agricultura, Pesca y Alimentación y se actualizan la composición y funciones de diversos órganos colegiados de este Departamento                              |
| 1998 | BOE-A-1998-13841                | Orden de 10 de junio de 1998 por la que se crea el Comité Consultivo del Sector Pesquero                                                                                                                                                                                              |
| 1999 | BOE-A-1999-20373                | Orden de 6 de octubre de 1999 por la que se prohíbe el ejercicio de la pesca con los artes denominados «mosca» y «claro» en el caladero nacional                                                                                                                                      |
| 1999 | BOE-A-1999-6496                 | Real Decreto 331/1999 de normalización y tipificación de los productos de la pesca, frescos, refrigerados o cocidos.                                                                                                                                                                  |
| 1999 | BOE-A-1999-20641                | Real Decreto 1440/1999 por el que se regula el ejercicio de la pesca con artes de arrastre de fondo en el caladero nacional del Mediterráneo                                                                                                                                          |
| 2000 | <a href="#">BOE-A-2001-6008</a> | Ley 3/2001, de 26 de marzo, Ley de Pesca Marítima del Estado                                                                                                                                                                                                                          |
| 2001 |                                 |                                                                                                                                                                                                                                                                                       |
| 2002 | BOE-A-2002-9854                 | Orden APA/1127/2002, de 13 de mayo, por la que se establecen medidas para reducir la mortalidad incidental de las aves marinas en las pesquerías de palangre de superficie<br>Medidas para reducir la mortalidad de aves marinas en palangre de superficie                            |
| 2003 | BOE-A-2003-1490                 | Orden APA/62/2003, de 20 de enero, por la que se regula el ejercicio de la actividad pesquera con arte de almadra y la concesión de las licencias<br>Se regula la pesca con almadra y la concesión de las licencias                                                                   |

| Year | Law/Regulation/Recommendation | Description                                                                                                                                                                                                                                                                                           |
|------|-------------------------------|-------------------------------------------------------------------------------------------------------------------------------------------------------------------------------------------------------------------------------------------------------------------------------------------------------|
| 2003 | BOE-A-2003-18096              | Real Decreto 1204/2003, de 19 de septiembre, por el que se crea la Comisión Interministerial de Investigación Pesquera Creación de la comisión interministerial de Investigación pesquera                                                                                                             |
| 2004 | BOE-A-2004-19310              | Real Decreto 2176/2004, de 12 de noviembre, por el que se modifica el Real Decreto 429/2004, de 12 de marzo, por el que se establecen medidas de ordenación de la flota pesquera de cerco medidas de ordenación de la flota pesquera de cerco                                                         |
| 2004 | BOE-A-2004-2125               | Real Decreto 121/2004, de 23 de enero, sobre la identificación de los productos de la pesca, de la acuicultura y del marisqueo vivos, frescos, refrigerados o cocidos Sobre la identificación de los productos de la pesca, de la acuicultura y del marisqueo vivos, frescos, refrigerados o cocidos. |
| 2004 | BOE-A-2004-4459               | ORDEN PRE/634/2004 por la que se crea la Comisión de Denominaciones Comerciales de Especies Pesqueras en España                                                                                                                                                                                       |
| 2004 | BOE-A-2004-18480              | Real Decreto 2064/2004, de 15 de octubre, por el que se regula la primera venta de los productos pesqueros por elque se regula la primera venta de los productos pesqueros.                                                                                                                           |
| 2005 | BOE-A-2005-756                | RD 1615/2005 , de 30 de diciembre, por el que se modifica el Real Decreto 560/1995, de 7 de abril, por el que seestablecen las tallas mínimas de determinadas especies pesqueras.                                                                                                                     |
| 2005 | BOE-A-2005-15098              | Orden APA/2795/2005, de 5 de septiembre, por la que se modifica la Orden APA/62/2003, de 20 de enero, por la que se regula el ejercicio de la actividad pesquera con arte de almadraba y la concesión de las licencias Se regula la pesca con almadraba                                               |
| 2006 | BOE-A-2006-5782               | Orden APA/910/2006, de 21 de marzo, por la que se regula la pesca con determinados tipos de arrastre de fondo en elCaladero Nacionalse regula la pesca con determinados tipos de arrastre de fondo en el Caladero Nacional.                                                                           |

| Year | Law/Regulation/Recommendation | Description                                                                                                                                                                                                                                                                                                                 |
|------|-------------------------------|-----------------------------------------------------------------------------------------------------------------------------------------------------------------------------------------------------------------------------------------------------------------------------------------------------------------------------|
| 2006 | BOE-A-2006-14018              | Orden APA/2521/2006, de 27 de julio, por la que se regula la pesca con el arte de palangre de superficie para la captura de especies altamente migratorias y por la que se crea el censo unificado de palangre de superficie se regula palangre de superficie para especies altamente migratorias y se crea censo unificado |
| 2006 | BOE-A-2006-756                | Real Decreto 1615/2005, de 30 de diciembre, por el que se modifica el Real Decreto 560/1995, de 7 de abril, por el que se establecen las tallas mínimas de determinadas especies pesqueras                                                                                                                                  |
| 2007 |                               |                                                                                                                                                                                                                                                                                                                             |
| 2008 |                               |                                                                                                                                                                                                                                                                                                                             |
| 2009 | BOE-A-2009-20498              | RReal Decreto 1822/2009, de 27 de noviembre, por el que se regula la primera venta de los productos pesqueros por el que se regula la primera venta de los productos pesqueros.                                                                                                                                             |
| 2009 | BOE-A-2009-15857              | Orden ARM/2869/2009, de 28 de septiembre, por la que se prohíbe la captura de tiburones zorro (familia Alopiidae) y tiburones martillo o cornudas (familia Sphyrnidae).                                                                                                                                                     |
| 2010 | BOE-A-2010-2396               | Orden ARM/271/2010, de 10 de febrero, por la que se establecen los criterios para el reparto y la gestión de la cuota de caballa, y se regula su captura y desembarque                                                                                                                                                      |
| 2010 | BOE-A-2010-20041              | Orden ARM/3361/2010, de 23 de diciembre, por la que se establecen medidas para la gestión de la pesquería de merluza en las divisiones CIEM VIIIc y Ixa                                                                                                                                                                     |

| Year | Law/Regulation/Recommendation | Description                                                                                                                                                                                                                                                                                                       |
|------|-------------------------------|-------------------------------------------------------------------------------------------------------------------------------------------------------------------------------------------------------------------------------------------------------------------------------------------------------------------|
| 2011 | BOE-A-2011-18200              | Orden ARM/3156/2011, de 10 de noviembre, por la que se establece el reparto porcentual de posibilidades de pescade la bacaladilla, el gallo y la cigala entre las diferentes modalidades de pesca en las divisiones CIEM VIIC y IXA                                                                               |
| 2011 | BOE-A-2011-19399              | Orden ARM/3379/2011, de 2 de diciembre, por la que se corrigen errores en la Orden ARM/3156/2011, de 10 de noviembre, por la que se establece el reparto porcentual de posibilidades de pesca de la bacaladilla, el gallo y la cigala entre las diferentes modalidades de pesca en las divisiones CIEM VIIC y IXA |
| 2011 | BOE-A-2011-18201              | Orden ARM/3157/2011, de 10 de noviembre, por la que se establece el reparto porcentual de posibilidades de pescadel jurel y el rape entre las diferentes modalidades de pesca en las divisiones CIEM VIIC y IXA                                                                                                   |
| 2012 | BOE-A-2012-10678              | Orden AAA/1770/2012, de 30 de julio, por la que se modifica la Orden ARM/3361/2010, de 23 de diciembre, por la que se establecen medidas para la gestión de la pesquería de merluza en las divisiones CIEM VIIC y IXA                                                                                             |
| 2013 | BOE-A-2013-8113               | Orden AAA/1416/2013, de 15 de julio, por la que se publican las nuevas relaciones de zonas de producción de moluscos y otros invertebrados marinos en el litoral español                                                                                                                                          |
| 2013 | BOE-A-2013-8564               | Real Decreto 629/2013, de 2 de agosto, por el que se regula la pesca del coral rojo, su primera venta y el procedimiento de autorización para la obtención de licencias para su pesca                                                                                                                             |
| 2014 | BOE-A-2014-4514               | <a href="#">Orden AAA/658/2014, de 22 de abril, por el que se regula la pesca con el arte de palangre de superficie para la captura de especies altamente migratorias.</a>                                                                                                                                        |

| Year | Law/Regulation/Recommendation | Description                                                                                                                                                                                                                                                                                                                                                                                                        |
|------|-------------------------------|--------------------------------------------------------------------------------------------------------------------------------------------------------------------------------------------------------------------------------------------------------------------------------------------------------------------------------------------------------------------------------------------------------------------|
| 2015 | BOE-A-2015-1405               | <a href="#">Resolución de 5 de febrero de 2015, de la Secretaría General de Pesca, por la que se modifica la de 12 de marzo de 2014, por la que se modifica la de 2 de septiembre de 2011, en la que se publica el listado de puertos designados conforme a la Orden ARM/2017/2011, de 11 de julio, por la que se establece el control de los desembarques de más de 10 toneladas de arenque, caballa y jurel.</a> |
| 2015 | BOE-A-2015-11118              | <a href="#">Orden AAA/2139/2015, de 6 de octubre, por la que se convoca el procedimiento de autorización para la concesión de licencias de extracción y venta de coral rojo.</a>                                                                                                                                                                                                                                   |
| 2016 |                               | <a href="#">Resolución de 12 de febrero de 2016, de la Secretaría General de Pesca, para la concesión de autorizaciones para la extracción y venta de coral rojo en aguas exteriores para el periodo comprendido entre el 21 de febrero de 2016 y el 20 de febrero de 2018, ambos inclusive.</a>                                                                                                                   |
| 2016 |                               | <a href="#">Resolución de 16 de noviembre de 2016, de la Secretaría General de Pesca, por la que se concede tres autorizaciones para la pesca del coral rojo en aguas exteriores conforme a la convocatoria del Director General de Recursos Pesqueros de fecha 20 de julio de 2016.</a>                                                                                                                           |
| 2016 | BOE-A-2016-2007               | <a href="#">Resolución de 23 de febrero de 2016, de la Secretaría General de Pesca, por la que se publica la asignación de cuotas de atún rojo y del censo específico de la flota autorizada para el ejercicio de la pesca del atún rojo.</a>                                                                                                                                                                      |
| 2016 |                               | <a href="#">Circular informativa. Documento de capturas electrónico (eBCD) de atún rojo. 2016</a>                                                                                                                                                                                                                                                                                                                  |
| 2017 | BOE-A-2017-15014              | <a href="#">Resolución de 28 de marzo de 2017 que modifica la Resolución de 13 de febrero, por la que se establecen los puertos designados para desembarque de pez espada.</a>                                                                                                                                                                                                                                     |
| 2017 | BOE-A-2017-12614              | <a href="#">Orden APM/1057/2017, de 30 de octubre, por la que se modifica la Orden AAA/658/2014, de 22 de abril, por la que se regula la pesca con arte de palangre de superficie para la captura de especies altamente migratorias, y por la que se deroga la Orden ARM/1647/2009, de 15 de junio, por la que se regula la pesca de especies altamente migratorias.</a>                                           |
| 2017 | BOE-A-2017-13204              | <a href="#">Orden APM/1101/2017, de 2 de noviembre, por la que se convoca el procedimiento de autorización para la extracción y venta de coral rojo.</a>                                                                                                                                                                                                                                                           |

| Year | Law/Regulation/Recommendation | Description                                                                                                                                                                                                                                                                                                                                                                                     |
|------|-------------------------------|-------------------------------------------------------------------------------------------------------------------------------------------------------------------------------------------------------------------------------------------------------------------------------------------------------------------------------------------------------------------------------------------------|
| 2018 | BOE-A-2018-7500               | <a href="#"><u>Orden APM/605/2018, de 1 de junio, por la que se establece un plan de gestión y recuperación para la sardina (Sardinapilchardus) de las aguas ibéricas (8c y 9a) del Consejo Internacional para la Exploración del Mar.</u></a>                                                                                                                                                  |
| 2018 |                               | <a href="#"><u>Convocatoria sorteo coral rojo 2018</u></a>                                                                                                                                                                                                                                                                                                                                      |
| 2018 |                               | <a href="#"><u>Resolución de 25 de mayo de la Secretaria General de Pesca que establece medidas de control para la pesca de Coralrojo y un programa de seguimiento y control específico</u></a>                                                                                                                                                                                                 |
| 2018 | BOE-A-2018-15612              | <a href="#"><u>Orden APA/1186/2018, de 14 de noviembre, por la que, en uso de la habilitación contenida en su disposición final segunda, se modifica en materia de vedas y límites de captura el Real Decreto 629/2013, de 2 de agosto, por el que se regula la pesca del coral rojo, su primera venta y el procedimiento de autorización para la obtención de licencias para su pesca.</u></a> |
| 2019 | BOE-A-2019-6885               | <a href="#"><u>Orden APA/514/2019, de 26 de abril, por la que se fijan normas para la aplicación de las exenciones a la obligación dedesembarque y para la mejora en la selectividad de los artes.</u></a>                                                                                                                                                                                      |

**Table S2.4.** Summary of the Spanish Fisheries Regulations concerning the marine areas of Galicia and Asturias

| Year | Law/Regulation/Resolution                                                                                                                                                                                                  |
|------|----------------------------------------------------------------------------------------------------------------------------------------------------------------------------------------------------------------------------|
| 1985 |                                                                                                                                                                                                                            |
| 1986 |                                                                                                                                                                                                                            |
| 1987 |                                                                                                                                                                                                                            |
| 1988 | <a href="#">Ley de costas 22/1988</a>                                                                                                                                                                                      |
| 1989 | <a href="#">Ley 4/1989, de 27 de marzo CONSERVACION DE LOS ESPACIOS NATURALES Y FAUNA SILVESTRE</a>                                                                                                                        |
|      |                                                                                                                                                                                                                            |
|      | <a href="#">Real Decreto 1095/89</a>                                                                                                                                                                                       |
|      | Orden del 30 de Enero de 1989 Sobre la realizacion del censo de la flota pesquera operativa                                                                                                                                |
|      | Orden de 20 de febrero de 1989 por la que se establece la talla mínima de captura de la «cigala» en el caladero nacional y la forma de efectuar su medición.                                                               |
| 1990 |                                                                                                                                                                                                                            |
| 1991 | <a href="#">Ley 5/1991</a>                                                                                                                                                                                                 |
| 1992 | Real Decreto 1112/1992 Modificación Ley de Costas                                                                                                                                                                          |
|      | Ley 27/1992 Ley de puertos                                                                                                                                                                                                 |
| 1993 | Orden de 20 de diciembre de 1993 por la que se hacen públicas las relaciones de zonas de producción de moluscos y otros invertebrados marinos vivos en el litoral español                                                  |
| 1994 | <a href="#">Real Decreto 60/1994, de 21 de enero, por el que se modifica parcialmente el Real Decreto 632/1993, de 3 de mayo, por el que se regula el ejercicio de la pesca de arrastre de fondo en el golfo de Cádiz.</a> |
|      | Orden del 18 de Mayo de 1994 Se establecen criterios para el censo del congeladores de la zona NAFO                                                                                                                        |



| Year | Law/Regulation/Resolution                                                                                                                                                                                                      |
|------|--------------------------------------------------------------------------------------------------------------------------------------------------------------------------------------------------------------------------------|
| 1995 | <a href="#">Real Decreto 560/1995, de 7 de abril, por el que se establece las tallas mínimas de determinadas especies pesqueras.</a>                                                                                           |
|      | <a href="#">Real Decreto 1997/1995, de 7 de diciembre, por el que se establecen medidas para contribuir a garantizar la biodiversidad mediante la conservación de los hábitats naturales y de la fauna y flora silvestres.</a> |
|      | <a href="#">Decreto 320/1995, de 10 de noviembre, por el que se regulan las actividades de observación de cetáceos</a>                                                                                                         |
|      | Orden 6 de noviembre de 1995 Regula flota de pesca de pez espada                                                                                                                                                               |
| 1996 | <a href="#">Orden de 22 de noviembre de 1996 por la que se prohíbe la pesca de determinadas especies pelágicas con artes de arrastre.</a>                                                                                      |
|      | <a href="#">ORDEN de 22 de marzo de 1996 por la que se regulan las capturas de especies pelagicas en el Cantabrico y noroeste, durante la campaña de 1996.</a>                                                                 |
| 1997 |                                                                                                                                                                                                                                |
|      |                                                                                                                                                                                                                                |
|      | Orden de 16 de Octubre de 1997                                                                                                                                                                                                 |
|      | Orden del 28 de Enero de 1997                                                                                                                                                                                                  |
|      |                                                                                                                                                                                                                                |

| Year | Law/Regulation/Resolution                                                                                                                                                                    |
|------|----------------------------------------------------------------------------------------------------------------------------------------------------------------------------------------------|
| 1998 | Real Decreto 71/1998                                                                                                                                                                         |
|      | Orden 10 de Junio de 1998                                                                                                                                                                    |
|      | <a href="#">OSPAR</a>                                                                                                                                                                        |
| 1999 | <a href="#">Real Decreto 1441/1999, de 10 de septiembre, por el que se regula el ejercicio de la pesca con artes de arrastre de fondo en el caladero nacional del Cantábrico y Noroeste.</a> |
|      | Orden del 6 de Octubre de 1999                                                                                                                                                               |
|      | Real Decreto 331/1999                                                                                                                                                                        |
|      | Real Decreto 1440/1999                                                                                                                                                                       |
| 2000 | Orden de 24 de julio de 2000 por la que se modifica la de 26 de febrero de 1999 por la que se establecen las normas que regulan la pesca marítima de recreo.                                 |

| Year | Law/Regulation/Resolution                                                                                                                                                                                                                                                                                                                                                              |
|------|----------------------------------------------------------------------------------------------------------------------------------------------------------------------------------------------------------------------------------------------------------------------------------------------------------------------------------------------------------------------------------------|
|      | <a href="#">Decreto 178/2000, de 6 de septiembre, por el que se regulan las actividades de observación de cetáceos.</a>                                                                                                                                                                                                                                                                |
| 2001 | <a href="#">Real Decreto 410/2001, de 20 de abril, por el que se regula la pesca con artes fijos en el Caladero Nacional del Cantábrico y Noroeste.</a>                                                                                                                                                                                                                                |
|      | <a href="#">Ley 3/2001, de 26 de marzo, de Pesca Marítima del Estado.</a>                                                                                                                                                                                                                                                                                                              |
| 2002 | Orden APA/1127/2002                                                                                                                                                                                                                                                                                                                                                                    |
| 2003 | Real Decreto 1204/2003                                                                                                                                                                                                                                                                                                                                                                 |
|      | <a href="#">Orden APA/874/2003, de 10 de abril, por la que se establecen los puertos donde pueden realizarse los desembarques superiores a 100 kg de especies de aguas profundas, procedentes de las subzonas I a XIV del Consejo Internacional para la Exploración del Mar (CIEM), y de las aguas comunitarias situadas dentro de las Zonas Copace 34.1.1, 34.1.2, 34.1.3 y 34.2.</a> |
| 2004 | <a href="#">Orden APA/2266/2004, de 30 de junio, por la que se establecen las condiciones para el ejercicio de la actividad pesquera de la flota de cerco española en aguas continentales de Portugal, por fuera de las 12 millas.</a>                                                                                                                                                 |
|      | <a href="#">Orden APA/2086/2004, de 22 de junio, por la que se designan los puertos para el desembarque de más de dos toneladas de merluza del norte procedentes de determinadas zonas del Consejo Internacional de Exploración del Mar.</a>                                                                                                                                           |
|      | <a href="#">Real Decreto 429/2004, de 12 de marzo, por el que se establecen medidas de ordenación de la flota pesquera de cerco.</a>                                                                                                                                                                                                                                                   |
|      | <a href="#">Real Decreto 2176/2004, de 12 de noviembre, por el que se modifica el Real Decreto 429/2004, de 12 de marzo, por el que se establecen medidas de ordenación de la flota pesquera de cerco.</a>                                                                                                                                                                             |

| Year | Law/Regulation/Resolution                                                                                                                                                                                                                                     |
|------|---------------------------------------------------------------------------------------------------------------------------------------------------------------------------------------------------------------------------------------------------------------|
|      | Real Decreto 121/2004                                                                                                                                                                                                                                         |
|      | ORDEN PRE/634/2004                                                                                                                                                                                                                                            |
|      | Real Decreto 2064/2004                                                                                                                                                                                                                                        |
|      | <a href="#">Canje de Notas de fechas 1 de septiembre de 2004 y 6 de septiembre de 2005, constitutivo de Acuerdo entre el Reino de España y la República portuguesa por el que se establece el Reglamento de pesca en el Tramo Internacional del río Miño.</a> |
| 2005 | <a href="#">Orden APA/1589/2005, de 31 de mayo, por la que se establece un plan para la pesca de langosta con nasas, en determinada zona del Cantábrico Oriental.</a>                                                                                         |
|      | RD 1615/2005                                                                                                                                                                                                                                                  |
|      | Orden APA/2795/2005                                                                                                                                                                                                                                           |
| 2006 | ORDEN APA/910/2006                                                                                                                                                                                                                                            |

| Year | Law/Regulation/Resolution                                                                                                                                                                                                            |
|------|--------------------------------------------------------------------------------------------------------------------------------------------------------------------------------------------------------------------------------------|
|      | Orden APA/2521/2006                                                                                                                                                                                                                  |
| 2007 | Real Decreto 307/2007                                                                                                                                                                                                                |
|      | <a href="#">Reglamento (CE) 1100/2007 del Consejo, de 18 de septiembre de 2007, por el que se establecen medidas para la recuperación de la población de anguila europea.</a>                                                        |
|      | <a href="#">Orden APA/609/2007, de 26 de febrero, por la que se designan los puertos de desembarque de determinadas capturas realizadas con volantas de fondo en ciertas zonas del Consejo Internacional de Exploración del Mar.</a> |
|      | <a href="#">REAL DECRETO 1727/2007, de 21 de diciembre, por el que se establecen medidas de protección de los cetáceos.</a>                                                                                                          |
|      | <a href="#">LEY 42/2007, de 13 de diciembre</a>                                                                                                                                                                                      |
|      | <a href="#">Orden APA/1966/2007, de 20 de junio, por la que se establecen las condiciones para el ejercicio de la actividad pesquera al cerco en el ámbito del acuerdo fronterizo del Miño.</a>                                      |
| 2008 |                                                                                                                                                                                                                                      |
| 2009 | <a href="#">Orden ARM/1647/2009, de 15 de junio, por la que se regula la pesca de especies altamente migratorias.</a>                                                                                                                |

| Year | Law/Regulation/Resolution                                                                                                                                                               |
|------|-----------------------------------------------------------------------------------------------------------------------------------------------------------------------------------------|
|      | <a href="#">Real Decreto 1822/2009, de 27 de noviembre, por el que se regula la primera venta de los productos pesqueros.</a>                                                           |
|      | <a href="#">Orden ARM/2689/2009, de 28 de septiembre, por la que se prohíbe la captura de tiburones zorro (familia Alopiidae) y tiburones martillo o cornudas (familia Sphyrnidae).</a> |
| 2010 | <a href="#">Ley 41/2010</a>                                                                                                                                                             |
|      | Orden ARM/271/2010, de 10 de febrero, por la que se establecen los criterios para el reparto y la gestión de la cuota de caballa, y se regula su captura y desembarque                  |
|      | Orden ARM/3361/2010, de 23 de diciembre, por la que se establecen medidas para la gestión de la pesquería de merluza en las divisiones CIEM VIIIc y Ixa                                 |
| 2011 | <a href="#">Real Decreto 347/2011, de 11 de marzo, por el que se regula la pesca marítima de recreo en aguas exteriores.</a>                                                            |
|      |                                                                                                                                                                                         |
|      | <a href="#">Real Decreto 1599/2011, de 4 de noviembre</a>                                                                                                                               |
|      | <a href="#">Real Decreto 1274/2011, de 16 de septiembre</a>                                                                                                                             |

| Year | Law/Regulation/Resolution                                                                                                                                                                                                                                                                                           |
|------|---------------------------------------------------------------------------------------------------------------------------------------------------------------------------------------------------------------------------------------------------------------------------------------------------------------------|
|      | Orden ARM/3156/2011, de 10 de noviembre, por la que se establece el reparto porcentual de posibilidades de pesca de la bacaladilla, el gallo y la cigala entre las diferentes modalidades de pesca en las divisiones CIEM VIIIIC y IXA                                                                              |
|      | Orden ARM/3379/2011, de 2 de diciembre, por la que se corrigen errores en la Orden ARM/3156/2011, de 10 de noviembre, por la que se establece el reparto porcentual de posibilidades de pesca de la bacaladilla, el gallo y la cigala entre las diferentes modalidades de pesca en las divisiones CIEM VIIIIC y IXA |
|      | Orden ARM/3157/2011, de 10 de noviembre, por la que se establece el reparto porcentual de posibilidades de pesca del jurel y el rape entre las diferentes modalidades de pesca en las divisiones CIEM VIIIIC y IXA                                                                                                  |
|      | <a href="#">Real Decreto 556/2011, de 20 de abril, para el desarrollo del Inventario Español del Patrimonio Natural y la Biodiversidad</a>                                                                                                                                                                          |
|      | <a href="#">Real Decreto 1629/2011, de 14 de noviembre, por el que se declara como Área Marina Protegida y como Zona Especial de Conservación el espacio marino de El Cachucho, y se aprueban las correspondientes medidas de conservación.</a>                                                                     |
| 2012 | Orden AAA/1770/2012, de 30 de julio, por la que se modifica la Orden ARM/3361/2010, de 23 de diciembre, por la que se establecen medidas para la gestión de la pesquería de merluza en las divisiones CIEM VIIC y IXA                                                                                               |
|      | <a href="#">Orden AAA/1589/2012, de 17 de julio, por la que se regula la pesquería del voraz (Pagellus bogaraveo) con el arte denominado voracera en el Estrecho de Gibraltar.</a>                                                                                                                                  |
|      | <a href="#">Acuerdo de pesca entre el Reino de España y la República Portuguesa para el ejercicio de la actividad de la flota pesquera artesanal de Madeira y Canarias, hecho «ad referendum» en Oporto el 9 de mayo de 2012.</a>                                                                                   |

| Year | Law/Regulation/Resolution                                                                                                                                                                                                                                                                                              |
|------|------------------------------------------------------------------------------------------------------------------------------------------------------------------------------------------------------------------------------------------------------------------------------------------------------------------------|
| 2013 | <a href="#">Resolución de 2 de julio de 2013, de la Dirección General de Sostenibilidad de la Costa y del Mar,</a>                                                                                                                                                                                                     |
|      | Orden AAA/1416/2013, de 15 de julio, por la que se publican las nuevas relaciones de zonas de producción de moluscos y otros invertebrados marinos en el litoral español                                                                                                                                               |
|      | <a href="#">Ley 2/2013, de 29 de mayo</a>                                                                                                                                                                                                                                                                              |
|      | Real Decreto 629/2013, de 2 de agosto, por el que se regula la pesca del coral rojo, su primera venta y el procedimiento de autorización para la obtención de licencias para su pesca                                                                                                                                  |
|      | <a href="#">Resolución de 22 de marzo de 2013, de la Dirección General de Sostenibilidad de la Costa y del Mar, por la que se establecen los dos primeros elementos del Inventario Español de Hábitats Marinos: la lista patrón de los tipos de hábitats marinos presentes en España y su clasificación jerárquica</a> |
| 2014 | <a href="#">Acuerdo sobre condiciones de ejercicio de la actividad de las flotas española y portuguesa en las aguas de ambos países entre el Reino de España y la República Portuguesa, hecho en Bruselas el 24 de marzo de 2014.</a>                                                                                  |
|      | <a href="#">Real Decreto 36/2014, de 24 de enero, por el que se regulan los títulos profesionales del sector pesquero.</a>                                                                                                                                                                                             |



| Year | Law/Regulation/Resolution                                                                                                                                                                                                                                                                                                                                                                                                                                                                                                                                                                                                                                                                                                                                                                                                                                                                                                                                                                                                                                                                                                                                                                                                                           |
|------|-----------------------------------------------------------------------------------------------------------------------------------------------------------------------------------------------------------------------------------------------------------------------------------------------------------------------------------------------------------------------------------------------------------------------------------------------------------------------------------------------------------------------------------------------------------------------------------------------------------------------------------------------------------------------------------------------------------------------------------------------------------------------------------------------------------------------------------------------------------------------------------------------------------------------------------------------------------------------------------------------------------------------------------------------------------------------------------------------------------------------------------------------------------------------------------------------------------------------------------------------------|
|      | <p><a href="#"><u>Orden AAA/1505/2014, de 31 de julio, por la que regula la pesquería de arrastre de fondo, en aguas de la subzona IX del Consejo Internacional de Exploración del Mar sometidas a la soberanía o jurisdicción de Portugal.</u></a></p> <p><a href="#"><u>Orden AAA/1260/2014, de 9 de julio, por la que se declaran Zonas de Especial Protección para las Aves en aguas marinas españolas.</u></a></p> <p><a href="#"><u>Orden AAA/1512/2014, de 30 de julio, por la que se establece un plan de gestión para la sardina (<i>Sardina pilchardus</i>) de las aguas ibéricas (VIIIc y IXa) y se modifica la Orden AAA/1307/2013, de 1 de julio, por la que se establece un plan de gestión para los buques de los censos del Caladero Nacional del Cantábrico y Noroeste.</u></a></p> <p><a href="#"><u>Orden AAA/658/2014, de 22 de abril, por el que se regula la pesca con el arte de palangre de superficie para la captura de especies altamente migratorias.</u></a></p>                                                                                                                                                                                                                                                       |
| 2015 | <p><a href="#"><u>Orden AAA/1/2015, de 7 de enero, por la que se modifica la Orden AAA/1512/2014, de 30 de julio, por la que se establece un plan de gestión para la sardina (<i>Sardina pilchardus</i>) de las aguas ibéricas (VIIIc y IXa) y la Orden AAA/1307/2013, de 1 de julio, por la que se establece un plan de gestión para los buques de los censos del Caladero Nacional del Cantábrico y Noroeste.</u></a></p> <p><a href="#"><u>Orden AAA/2534/2015, de 17 de noviembre, por la que se establece un Plan de gestión para los buques de los censos del Caladero Nacional del Cantábrico y Noroeste.</u></a></p> <p><a href="#"><u>Real Decreto 418/2015, de 29 de mayo, por el que se regula la primera venta de los productos pesqueros.</u></a></p> <p><a href="#"><u>Resolución de 20 de noviembre de 2015 Dirección General de Sostenibilidad de la Costa y del Mar por la que se integran en la Red de Áreas Marinas Protegidas de España las zonas de especial protección para las aves marinas de la Red Natura 2000</u></a></p> <p><a href="#"><u>Orden AAA/2139/2015, de 6 de octubre, por la que se convoca el procedimiento de autorización para la concesión de licencias de extracción y venta de coral rojo.</u></a></p> |

| Year | Law/Regulation/Resolution                                                                                                                                                                                                                                                                                                                                                                                                      |
|------|--------------------------------------------------------------------------------------------------------------------------------------------------------------------------------------------------------------------------------------------------------------------------------------------------------------------------------------------------------------------------------------------------------------------------------|
|      | <a href="#">Resolución de 5 de febrero de 2015, de la Secretaría General de Pesca, por la que se modifica la de 12 de marzo de 2014, por la que se modifica la de 2 de septiembre de 2011, en la que se publica el listado de puertos designados conforme a la Orden ARM/2017/2011, de 11 de julio, por la que se establece el control de los desembarques de más de 10 toneladas de arenque, caballa y jurel.</a>             |
| 2016 | <a href="#">Orden AAA/661/2016, de 3 de abril, por la que se establecen criterios de desembarque de besugo capturado en aguas de la Unión y aguas internacionales de las zonas VI, VII y VIII del Consejo Internacional para la Exploración del Mar (CIEM).</a>                                                                                                                                                                |
|      | <a href="#">Orden AAA/661/2016, de 3 de abril, por la que se establecen criterios de desembarque de besugo capturado en aguas de la Unión y aguas internacionales de las zonas VI, VII y VIII del Consejo Internacional para la Exploración del Mar (CIEM).</a>                                                                                                                                                                |
|      | <a href="#">Resolución de 16 de noviembre de 2016, de la Secretaría General de Pesca, por la que se concede tres autorizaciones para la pesca del coral rojo en aguas exteriores conforme a la convocatoria del Director General de Recursos Pesqueros de fecha 20 de julio de 2016.</a>                                                                                                                                       |
|      | <a href="#">Resolución de 23 de febrero de 2016, de la Secretaría General de Pesca, por la que se publica la asignación de cuotas de atún rojo y del censo específico de la flota autorizada para el ejercicio de la pesca del atún rojo.</a>                                                                                                                                                                                  |
|      | <a href="#">Resolución de 12 de febrero de 2016, de la Secretaría General de Pesca, para la concesión de autorizaciones para la extracción y venta de coral rojo en aguas exteriores para el periodo comprendido entre el 21 de febrero de 2016 y el 20 de febrero de 2018, ambos inclusive.</a>                                                                                                                               |
|      | <a href="#">Orden AAA/196/2016, de 18 de febrero, por la que se modifica la Orden AAA/1512/2014, de 30 de julio, por la que se establece un plan de gestión para la sardina (<i>Sardina pilchardus</i>) de las aguas ibéricas (VIIIc y IXa) y se modifica la Orden AAA/1307/2013, de 1 de julio, por la que se establece un plan de gestión para los buques de los censos del Caladero Nacional del Cantábrico y Noroeste.</a> |

| Year | Law/Regulation/Resolution                                                                                                                                                                                                                                                                                                                                                                |
|------|------------------------------------------------------------------------------------------------------------------------------------------------------------------------------------------------------------------------------------------------------------------------------------------------------------------------------------------------------------------------------------------|
| 2017 | <a href="#">Orden APM/1057/2017, de 30 de octubre, por la que se modifica la Orden AAA/658/2014, de 22 de abril, por la que se regula la pesca con arte de palangre de superficie para la captura de especies altamente migratorias, y por la que se deroga la Orden ARM/1647/2009, de 15 de junio, por la que se regula la pesca de especies altamente migratorias.</a>                 |
|      | <a href="#">Resolución de 28 de marzo de 2017 que modifica la Resolución de 13 de febrero , por la que se establecen los puertos designados para desembarque de pez espada.</a>                                                                                                                                                                                                          |
|      | <a href="#">Orden APM/1101/2017, de 2 de noviembre, por la que se convoca el procedimiento de autorización para la extracción y venta de coral rojo.</a>                                                                                                                                                                                                                                 |
|      | <a href="#">Orden APM/920/2017, de 22 de septiembre, por la que se establece un Plan de gestión para los buques de los censos de las flotas de altura, gran altura y buques palangreros mayores y menores de 100 toneladas de registro bruto, que operan dentro de los límites geográficos de la Comisión de Pesca del Atlántico Nordeste.</a>                                           |
| 2018 | <a href="#">Real Decreto 957/2018, por lo que se modifica el anexo I de la Ley 41/2010, de 29 de diciembre, de protección del medio marino.</a>                                                                                                                                                                                                                                          |
|      | <a href="#">Orden APM/605/2018, de 1 de junio, por la que se establece un plan de gestión y recuperación para la sardina (Sardina pilchardus) de las aguas ibéricas (8c y 9a) del Consejo Internacional para la Exploración del Mar.</a>                                                                                                                                                 |
|      |                                                                                                                                                                                                                                                                                                                                                                                          |
|      | <a href="#">Resolución de 25 de mayo de la Secretaria General de Pesca que establece medidas de control para la pesca de Coral rojo y un programa de seguimiento y control específico</a>                                                                                                                                                                                                |
|      | <a href="#">Orden APA/1186/2018, de 14 de noviembre, por la que, en uso de la habilitación contenida en su disposición final segunda, se modifica en materia de vedas y límites de captura el Real Decreto 629/2013, de 2 de agosto, por el que se regula la pesca del coral rojo, su primera venta y el procedimiento de autorización para la obtención de licencias para su pesca.</a> |

| Year | Law/Regulation/Resolution                                                                                                                                                                                                                                                                                                                                                                                                                                                                                                                                                                |
|------|------------------------------------------------------------------------------------------------------------------------------------------------------------------------------------------------------------------------------------------------------------------------------------------------------------------------------------------------------------------------------------------------------------------------------------------------------------------------------------------------------------------------------------------------------------------------------------------|
| 2019 | <a href="#">Orden APA/514/2019, de 26 de abril, por la que se fijan normas para la aplicación de las exenciones a la obligación de desembarque y para la mejora en la selectividad de los artes.</a>                                                                                                                                                                                                                                                                                                                                                                                     |
|      | <a href="#">Orden APA/359/2019, de 26 de marzo, por la que se modifica la Orden AAA/661/2016, de 3 de abril, por la que se establecen criterios de desembarque de besugo capturado en aguas de la Unión y aguas internacionales de las zonas VI, VII y VIII del Consejo Internacional para la Exploración del Mar (CIEM) en lo relativo al establecimiento de vedas en determinadas zonas del caladero Cantábrico Noroeste.</a>                                                                                                                                                          |
|      | <a href="#">Orden APA/247/2019, de 5 de marzo, por la que se modifica la Orden AAA/661/2016, de 3 de abril, por la que se establecen criterios de desembarque de besugo capturado en aguas de la Unión y aguas internacionales de las zonas VI, VII y VIII del Consejo Internacional para la Exploración del Mar (CIEM) y se regula la aplicación del Reglamento (UE) 2018/2025 del Consejo, de 17 de diciembre de 2018, por el que se fijan para los buques pesqueros de la Unión las posibilidades de pesca en 2019 y 2020 de determinadas poblaciones de peces de aguas profundas</a> |
|      | <a href="#">A través de la Orden APA/514/2019 se regula a nivel nacional la aplicación de la obligación de desembarque. Se desarrollará por tres resoluciones, cada una referente a una exención ( de minimis, flexibilidad interespecies y alta supervivencia)</a>                                                                                                                                                                                                                                                                                                                      |
|      | <a href="#">Orden PCI/932/2019, de 30 de agosto, por la que se actualizan, de acuerdo con el Real Decreto 817/2014, de 26 de septiembre, cualificaciones profesionales de la Familia Profesional Marítimo Pesquera, recogidas en el Catálogo Nacional de Cualificaciones Profesionales, establecidas por el Real Decreto 1228/2006, de 27 de octubre.</a>                                                                                                                                                                                                                                |
|      | <a href="#">Resolución de 24 de mayo de 2019, de la Secretaría General de Pesca, por la que se publica el listado de denominaciones comerciales de especies pesqueras y de acuicultura admitidas en España.</a>                                                                                                                                                                                                                                                                                                                                                                          |

| Year | Law/Regulation/Resolution                                                                                                                                                                                                                                                                                                                                                                                             |
|------|-----------------------------------------------------------------------------------------------------------------------------------------------------------------------------------------------------------------------------------------------------------------------------------------------------------------------------------------------------------------------------------------------------------------------|
|      | <a href="https://www.boe.es/diario_boe/txt.php?id=BOE-A-2019-4481">Resolución de 19 de marzo de 2019, de la Secretaría General de Pesca, por la que se publican las cuotas de caballa, jurel VIIIc, jurel IXa para los buques del censo de cerco del Cantábrico Noroeste durante el año 2019. https://www.boe.es/diario_boe/txt.php?id=BOE-A-2019-4481</a>                                                            |
|      | <a href="#">Resolución de 11 de marzo de 2019, de la Secretaría General de Pesca, por la que se publica el censo de los buques de palangre de fondo autorizados a pescar merluza en el caladero del Cantábrico Noroeste durante el año 2019, así como la cuota de merluza asignada.</a>                                                                                                                               |
|      | <a href="#">Resolución de 11 de marzo de 2019, de la Secretaría General de Pesca, por la que se establecen las posibilidades de pesca individuales así como cuotas individuales de pesca para el año 2019 de los buques censados en la modalidad de arrastre de fondo autorizados a faenar en 2019 en el caladero Cantábrico y Noroeste.</a>                                                                          |
|      | <a href="#">Resolución de 27 de febrero de 2019, de la Secretaría General de Pesca, por la que se publica la actualización del censo de la flota de arrastre de fondo, en aguas de la subzona IX del Consejo Internacional de Exploración del Mar sometidas a la soberanía o jurisdicción de Portugal</a>                                                                                                             |
|      | <a href="#">Resolución de 27 de febrero de 2019, de la Secretaría General de Pesca, por la que se publica la actualización del censo de las flotas de altura, gran altura y buques palangreros mayores y menores de 100 toneladas de registro bruto, que operan dentro de los límites geográficos de la Comisión de Pesca del Atlántico Nordeste.</a>                                                                 |
|      | <a href="#">Resolución de 8 de febrero de 2019, de la Secretaría General de Pesca, por la que se publica el reparto individualizado de cuotas de merluza para el censo de los buques de volanta autorizados a pescar merluza en el caladero del Cantábrico Noroeste durante el año 2019</a>                                                                                                                           |
|      | <a href="#">Resolución de 28 de enero de 2019, de la Secretaría General de Pesca, por la que se establecen las cuotas iniciales para 2019 disponibles por modalidad o censo para las distintas especies contempladas en los planes de gestión de los buques censados en los caladeros nacionales del Cantábrico y Noroeste, Golfo de Cádiz, así como buques de arrastre de fondo que faenan en aguas de Portugal.</a> |

| Year | Law/Regulation/Resolution                                                                                                                        |
|------|--------------------------------------------------------------------------------------------------------------------------------------------------|
|      | <a href="#">Real Decreto 46/2019, de 8 de febrero, por el que se regula la pesquería de atún rojo en el Atlántico Oriental y el Mediterráneo</a> |

**Tabla S2.5.** Summary of fishing Regulations for the Gulf of Cádiz

| Year | Law/<br>Regulation/<br>Recommendation | Description                                                                                                                                                                                                                  | Fishing Art   | Specie |
|------|---------------------------------------|------------------------------------------------------------------------------------------------------------------------------------------------------------------------------------------------------------------------------|---------------|--------|
| 1987 | BOE-A-1987-11979                      | Orden de 7 de mayo de 1987 por la que se regula la concesión de permisos temporales para el ejercicio de la pesca de arrastre de fondo a embarcaciones de 5 a 35 TRB, en la Región Suratlántica.                             | Arrastre      |        |
| 1993 | BOE-A-1993-12850                      | Real Decreto 632/1993 de 3 de mayo, por el que se regula el ejercicio de la pesca de «arrastre de fondo» en el golfo de Cádiz                                                                                                | Arrastre      |        |
| 1993 | BOJA-1993-85-17                       | ORDEN de 15 de julio de 1993, por la que se declaran las zonas de producción y protección o mejora de moluscos bivalvos, moluscos gasterópodos, tunicados y equinodermos marinos de la Comunidad Autónoma de Andalucía       |               |        |
| 1994 | BOE-A-1994-4394                       | Real Decreto 60/1994 de 21 de enero, por el que se modifica parcialmente el Real Decreto 632/1993, de 3 de mayo, por el que se regula el ejercicio de la pesca de arrastre de fondo en el golfo de Cádiz                     | Arrastre      |        |
| 1995 |                                       |                                                                                                                                                                                                                              |               |        |
| 1996 | BOE-A-1996-26973                      | Orden de 22 de noviembre de 1996 por la que se establece un peso mínimo para el pulpo capturado en aguas exteriores del golfo de Cádiz y se prohíbe su pesca recreativa en el mencionado caladero.                           |               | Pulpo  |
| 1997 | BOE-A-1997-20857                      | Real Decreto 1428/1997, de 15 de septiembre, por el que se regula la pesca con artes menores en el caladero del Golfo de Cádiz                                                                                               | artes menores | 54spp  |
| 1998 | BOE-A-1998-15708                      | Orden de 17 de junio de 1998 por la que se establece un plan específico de pesca con el arte denominado «voracera» en determinada zona del estrecho de Gibraltar.                                                            | voracera      | Voraz  |
| 1999 | BOE-A-1999-21970                      | Orden de 2 de noviembre de 1999 por la que se modifica la Orden de 17 de junio de 1998, por la que se establece un plan específico de pesca con el arte denominado "voracera" en determinada zona del estrecho de Gibraltar. | voracera      | Voraz  |
| 2000 |                                       |                                                                                                                                                                                                                              |               |        |
| 2001 |                                       |                                                                                                                                                                                                                              |               |        |
| 2002 | BOE-A-2002-25439                      | Orden APA/3323/2002, de 20 de diciembre, por la que se establece un plan de pesca para la pesca del voraz en determinadas zonas del Estrecho de Gibraltar.                                                                   | voracera      | Voraz  |

| Year | Law/<br>Regulation/<br>Recommendation | Description                                                                                                                                                                                                                                                              | Fishing Art       | Specie    |
|------|---------------------------------------|--------------------------------------------------------------------------------------------------------------------------------------------------------------------------------------------------------------------------------------------------------------------------|-------------------|-----------|
| 2002 | BOJA-2002-45-1                        | <a href="#">Ley 1/2002, de 4 de abril, de ordenación, fomento y control de la Pesca Marítima, el Marisqueo y la Acuicultura Marina.</a>                                                                                                                                  |                   |           |
| 2003 | BOJA-2003-65-7                        | Orden de 25 de marzo de 2003, por la que se establece las tallas mínimas de captura y épocas de veda para los moluscos bivalvos y gasterópodos de la Comunidad de marzo de Autónoma de Andalucía                                                                         |                   |           |
| 2003 | BOJA-2003-65-5                        | ORDEN de 25 de marzo de 2003, por la que se modifica la de 15 de julio de 1993, por la que se declaran las zonas de producción y protección o mejora de moluscos bivalvos, moluscos gasterópodos, tunicados y equinodermos marinos de la Comunidad Autónoma de Andalucía |                   |           |
| 2004 | BOE-A-2004-18203                      | Orden APA/3423/2004, de 22 de octubre, por la que se establece un Plan, de carácter urgente, para la conservación y gestión sostenible de la pesquería de arrastre de fondo en el Caladero Nacional del Golfo de Cádiz                                                   | Arrastre de fondo |           |
| 2004 | BOE-A-2004-4778                       | Orden APA/679/2004, de 5 de marzo, por la que se regula la pesca con artes de cerco en el Caladero Nacional del Golfo de Cádiz                                                                                                                                           | cerco             |           |
| 2004 | BOE-A-2004-18545                      | Orden APA/3506/2004, de 25 de octubre, por la que se establece un Plan, de carácter urgente, para la conservación y gestión sostenible de la pesquería de cerco en el Caladero Nacional del Golfo de Cádiz                                                               | Cerco             |           |
| 2004 | BOJA-2004-52-3                        | <a href="#">Decreto 86/2004, de 2 de marzo, sobre Cofradías de Pescadores y sus Federaciones.</a>                                                                                                                                                                        |                   |           |
| 2004 | BOE-A-2004-12530                      | Orden APA/2179/2004, de 1 de julio, por la que se establece un plan para la pesca del pezsable en determinada zona del Estrecho de Gibraltar                                                                                                                             |                   | Pez sable |
| 2005 | BOE-A-2005-15357                      | Orden APA/2858/2005, de 14 de septiembre, por la que se establece un plan para la conservación y gestión sostenible de la pesquería de arrastre de fondo en el Caladero Nacional del Golfo de Cádiz                                                                      | Arrastre          |           |



| Year | Law/<br>Regulation/<br>Recommendation | Description                                                                                                                                                                                                                                                                    | Fishing Art   | Specie    |
|------|---------------------------------------|--------------------------------------------------------------------------------------------------------------------------------------------------------------------------------------------------------------------------------------------------------------------------------|---------------|-----------|
| 2005 | BOE-A-2005-1205                       | Orden APA/50/2005, de 20 de enero, por la que se establece un plan para la pesca del pezsable en determinada zona del Estrecho de Gibraltar                                                                                                                                    |               | Pez sable |
| 2005 | BOE-A-2005-12927                      | Orden APA/2438/2005, de 20 de julio, por la que se establece un plan para la conservación y gestión sostenible de la pesquería de pulpo en el Caladero Nacional del Golfo de Cádiz                                                                                             |               | pulpo     |
| 2006 | BOE-A-2006-16479                      | Orden APA/2883/2006, de 19 de septiembre, por la que se establece un plan de pesca para la pesquería de arrastre de fondo en el caladero nacional del golfo de Cádiz                                                                                                           | Arrastre      |           |
| 2006 | BOE-A-2006-7725                       | Orden APA/1268/2006, de 26 de abril, por la que se modifica la Orden APA/2438/2005, de 20 de julio, por la que se establece un plan para la conservación y gestión sostenible de la pesquería de pulpo en el Caladero Nacional del Golfo de Cádiz                              |               | pulpo     |
| 2006 | BOE-A-2006-5514                       | Real Decreto 284 /2006, de 10 de marzo, por el que se modifica el Real Decreto 1428/1997, de 15 de septiembre, por el que se regula la pesca con artes menores en el caladero del Golfo de Cádiz, en lo que respecta a las características técnicas de los aparejos de anzuelo | Artes menores |           |
| 2007 | BOE-A-2007-17109                      | Orden APA/2801/2007, de 27 de septiembre, por la que se establece un plan de pesca para la pesquería de arrastre de fondo en el Caladero Nacional del Golfo de Cádiz                                                                                                           | Arrastre      |           |
| 2008 | BOJA-2008-196-1                       | <a href="#">ORDEN de 23 de septiembre de 2008, por la que se establece el censo de embarcaciones marisqueras dedicadas a la captura de moluscos bivalvos y gasterópodos de Andalucía.</a>                                                                                      |               |           |
| 2009 | BOE-A-2009-15030                      | Orden ARM/2515/2009, de 17 de septiembre, por la que se regula la malla mínima de los artes y se establece un plan de pesca para la pesquería de arrastre de fondo en el Caladero Nacional del Golfo de Cádiz                                                                  | Arrastre      |           |
| 2009 | BOE-A-2009-2546                       | Orden ARM/249/2009, de 12 de febrero, por la que se establece una parada temporal para los buques incluidos en el censo de la modalidad de cerco del caladero nacional del Golfo de Cádiz                                                                                      | cerco         |           |
| 2009 | BOE-A-2008-3227                       | Orden ARM/401/2009, de 20 de febrero, por la que se establece una parada temporal para los buques incluidos en el censo de la modalidad de arrastre de fondo del Caladero Nacional del Golfo de Cádiz.                                                                         | arrastre      |           |
| 2009 | BOE-A-2009-19420                      | Orden ARM/3272/2009, de 2 de diciembre, por la que se establece un plan de pesca para la pesquería de cerco en el Caladero Nacional del Golfo de Cádiz                                                                                                                         | cerco         |           |
| 2010 | BOE-A-2010-14607                      | Orden ARM/2457/2010, de 21 de septiembre, por la que se establece un plan de pesca para la pesquería de arrastre de fondo en el Caladero Nacional del Golfo de Cádiz                                                                                                           | Arrastre      |           |

| Year | Law/<br>Regulation/<br>Recommendation | Description                                                                                                                                                                                                                                                                                                        | Fishing Art                                                   | Specie                    |
|------|---------------------------------------|--------------------------------------------------------------------------------------------------------------------------------------------------------------------------------------------------------------------------------------------------------------------------------------------------------------------|---------------------------------------------------------------|---------------------------|
| 2010 | BOE-A-2010-2396                       | Orden ARM/271/2010, de 10 de febrero, por la que se establecen los criterios para el reparto y la gestión de la cuota de caballa, y se regula su captura y desembarque                                                                                                                                             |                                                               | Caballa                   |
| 2010 | BOE-A-2010-20041                      | Orden ARM/3361/2010, de 23 de diciembre, por la que se establecen medidas para la gestión de la pesquería de merluza en las divisiones CIEM VIIIc y IXa                                                                                                                                                            | arrastre de fondo, volanta, palangre de fondo y artes menores | Merluza                   |
| 2010 | BOE-A-2010-18503                      | Orden ARM/3111/2010, de 26 de noviembre, por la que se establece un plan de pesca para la pesquería de cerco en el Caladero Nacional del Golfo de Cádiz                                                                                                                                                            | Cerco                                                         | Sardina, boquerón         |
| 2010 | BOJA-2010-214-1                       | Decreto 387/2010, de 19 de octubre regula el marisqueo en el litoral de la Comunidad Autónoma de Andalucía.                                                                                                                                                                                                        |                                                               | Moluscos                  |
| 2011 | BOE-A-2011-14084                      | Orden ARM/2296/2011, de 27 de julio, por la que se modifica la Orden ARM/2457/2010, de 21 de septiembre, por la que se establece un plan de pesca para la pesquería de arrastre de fondo en el Caladero Nacional del Golfo de Cádiz                                                                                | Arrastre                                                      |                           |
| 2011 | BOE-A-2011-18200                      | Orden ARM/3156/2011, de 10 de noviembre, por la que se establece el reparto porcentual de posibilidades de pesca de la bacaladilla, el gallo y la cigala entre las diferentes modalidades de pesca en las divisiones CIEM VIIIc y IXa                                                                              |                                                               | bacalaila, gallo y cigala |
| 2011 | BOE-A-2011-19399                      | Orden ARM/3379/2011, de 2 de diciembre, por la que se corrigen errores en la Orden ARM/3156/2011, de 10 de noviembre, por la que se establece el reparto porcentual de posibilidades de pesca de la bacaladilla, el gallo y la cigala entre las diferentes modalidades de pesca en las divisiones CIEM VIIIc y IXa |                                                               | bacalaila, gallo y cigala |
| 2011 | BOE-A-2011-18201                      | Orden ARM/3157/2011, de 10 de noviembre, por la que se establece el reparto porcentual de posibilidades de pesca del jurel y el rape entre las diferentes modalidades de pesca en las divisiones CIEM VIIIc y IXa                                                                                                  |                                                               | jurel, rape               |
| 2011 | BOE-A-2011-7744                       | Orden ARM/1083/2011, de 25 de abril, por la que se modifica la Orden ARM/3361/2010, de 23 de diciembre, por la que se establecen medidas para la gestión de la pesquería de merluza en las divisiones CIEM VIIIc y IXa                                                                                             |                                                               | merluza                   |
| 2011 | BOJA-2011-149-2                       | Orden de 26 de julio de 2011, por la que se modifica la Orden de 24 de junio de 2011, por la que se regula el marisqueo desde embarcación con draga hidráulica en el Golfo de Cádiz, y se establece un plan de ajuste del esfuerzo pesquero para la flota que opera en dicha modalidad y caladero                  | draga hidráulica                                              | Moluscos y crustáceos     |

| Year | Law/<br>Regulation/<br>Recommendation | Description                                                                                                                                                                                                                                                                                   | Fishing Art     | Specie                |
|------|---------------------------------------|-----------------------------------------------------------------------------------------------------------------------------------------------------------------------------------------------------------------------------------------------------------------------------------------------|-----------------|-----------------------|
| 2011 | BOJA-2011-196-3                       | Orden de 28 de septiembre de 2011, por la que se regula el marisqueo desde embarcación con rastros remolcados en el caladero nacional del Golfo de Cádiz                                                                                                                                      | rastros         | Moluscos y crustáceos |
| 2012 | BOE-A-2012-11407                      | Orden AAA/1895/2012, de 4 de septiembre, por la que se modifica la Orden ARM/2457/2010, de 21 de septiembre, por la que se establece un plan de pesca para la pesquería de arrastre de fondo en el Caladero Nacional del Golfo de Cádiz                                                       | Arrastre        |                       |
| 2012 | BOE-A-2012-9652                       | Orden AAA/1589/2012, de 17 de julio, por la que se regula la pesquería del voraz ( <i>Pagellus bogaraveo</i> ) con el arte denominado voracera en el Estrecho de Gibraltar                                                                                                                    | voracera        | Voraz                 |
| 2012 | BOE-A-2012-10678                      | Orden AAA/1770/2012, de 30 de julio, por la que se modifica la Orden ARM/3361/2010, de 23 de diciembre, por la que se establecen medidas para la gestión de la pesquería de merluza en las divisiones CIEM VIIC y IXA                                                                         |                 | Merluza               |
| 2012 | BOJA-2012-59-5                        | <a href="#">Decreto 64/2012, de 13 de marzo, por el que se regulan las jornadas y horarios de las actividades de marisqueo y pesca profesional y el sistema de localización y seguimiento de embarcaciones pesqueras andaluzas</a>                                                            |                 |                       |
| 2013 | BOE-A-2013-4084                       | Orden AAA/627/2013, de 15 de abril, por la que se establece un Plan de gestión para los buques de los censos del caladero nacional del Golfo de Cádiz                                                                                                                                         | Plan de gestión |                       |
| 2013 | BOJA-2013-119-15                      | Orden de 13 de junio de 2013, por la que se adaptan las jornadas y horarios de las actividades de marisqueo y pesca profesional en el Golfo de Cádiz actividades de marisqueo y pesca profesional en el Golfo de Cádiz                                                                        |                 |                       |
| 2014 |                                       |                                                                                                                                                                                                                                                                                               |                 |                       |
| 2015 | BOJA-2015-115-3                       | <a href="#">Orden de 10 de junio de 2015, por la que se modifica la de 23 de julio de 2009, por la que se establecen las normas básicas de intervención del Fondo Europeo de la Pesca 2007-2013 para el Desarrollo Sostenible de las Zonas de Pesca en la Comunidad Autónoma de Andalucía</a> | Fondos Europeos |                       |
| 2015 | BOJA-2015-44-4                        | <a href="#">Decreto 99/2015, de 3 de marzo, por el que se modifica el Decreto 387/2010, de 19 de octubre, por el que se regula el marisqueo en el litoral de la Comunidad Autónoma de Andalucía</a>                                                                                           | marisqueo       | moluscos              |
| 2016 | BOE-A-2016-8052                       | <a href="#">Orden AAA/1406/2016, de 18 de agosto, por la que se establece un Plan de gestión para los buques de los censos del Caladero Nacional del Golfo de Cádiz.</a>                                                                                                                      | Plan general    |                       |
| 2016 | BOE-A-2016-803                        | Orden AAA/55/2016, de 26 de enero, por la que se modifica la Orden AAA/1589/2012, de 17 de julio, por la que se regula la pesquería del voraz ( <i>Pagellus bogaraveo</i> ) con el arte denominado voracera en el Estrecho de Gibraltar                                                       | voracera        | Voraz                 |

| Year | Law/<br>Regulation/<br>Recommendation | Description                                                                                                                                                                                                                                                                                           | Fishing Art                              | Specie    |
|------|---------------------------------------|-------------------------------------------------------------------------------------------------------------------------------------------------------------------------------------------------------------------------------------------------------------------------------------------------------|------------------------------------------|-----------|
| 2016 | BOJA-2016-41-2                        | <a href="#">Orden de 19 de febrero de 2016, por la que se regulan los artes de trampa para la captura de pulpo (Octopus vulgaris) en el litoral mediterráneo de Andalucía y se crea el censo de embarcaciones autorizadas para dicha actividad.</a>                                                   |                                          | Pulpo     |
| 2016 | BOJA-2016-41-5                        | <a href="#">Orden de 24 de febrero de 2016, por la que se establecen medidas para la conservación del pulpo (Octopus vulgaris) en las aguas interiores del litoral mediterráneo de Andalucía.</a>                                                                                                     |                                          | Pulpo     |
| 2016 |                                       | <a href="#">Resolución de la Secretaría General de Pesca, por la que se establecen las disposiciones de aplicación del plan de recuperación del atún rojo en el Océano Atlántico Oriental y el Mar Mediterráneo para 2016</a>                                                                         | Plan recuperación                        | atún rojo |
| 2016 |                                       | <a href="#">Resolución de la Secretaría General de Pesca, por la que se modifica la Resolución de la Secretaría General de Pesca, por la que se establecen las disposiciones de aplicación del plan de recuperación del atún rojo en el Océano Atlántico Oriental y el Mar Mediterráneo para 2016</a> | Plan recuperación                        | atún rojo |
| 2016 | BOJA-2016-232-28                      | Orden de 30 de noviembre de 2016, por la que se adoptan medidas temporales de recuperación y conservación de la pesquería de chirla (Chamelea gallina) en el Golfo de Cádiz                                                                                                                           | plan recuperación                        | chirla    |
| 2017 | BOE-A-2017-8214                       | <a href="#">Orden APM/664/2017, de 12 de julio, por la que se modifica en lo referente a la captura del pulpo la Orden AAA/1406/2016, de 18 de agosto, por la que se establece un Plan de gestión para los buques de los censos del Caladero Nacional del Golfo de Cádiz.</a>                         |                                          | pulpo     |
| 2017 | BOJA-2017-80-1                        | <a href="#">Orden de 25 de abril de 2017, por la que se regula la captura de pulpo (Octopus vulgaris) con artes específicos en el caladero nacional del Golfo de Cádiz y se crea el Censo de embarcaciones autorizadas para dicha actividad.</a>                                                      |                                          | pulpo     |
| 2017 | BOJA-2017-76-6                        | <a href="#">Decreto 58/2017, de 18 de abril, por el que se regula la acuicultura marina en Andalucía</a>                                                                                                                                                                                              | Acuicultura                              |           |
| 2017 | BOJA-2017-124-5                       | <a href="#">ORDEN de 29 de junio de 2017, por la que se regula el marisqueo desde embarcación con draga hidráulica en el Golfo de Cádiz estableciendo medidas técnicas a fin de alcanzar niveles de rendimiento máximo sostenible.</a>                                                                | draga hidráulica                         |           |
| 2017 | BOJA-2017-228-29                      | <a href="#">Orden de 23 de noviembre de 2017, por la que se adaptan las jornadas y los horarios de las actividades de marisqueo y pesca profesional en el litoral andaluz.</a>                                                                                                                        |                                          |           |
| 2017 | BOE-A-2017-9987                       | <a href="#">Resolución de 17 de agosto de 2017, por la que se prohíbe la pesca, tenencia a bordo y desembarque de ejemplares de atún rojo para la modalidad de pesca deportiva y recreativa.</a>                                                                                                      | prohibición pesca deportiva y recreativa | atún rojo |
| 2017 | BOE-A-2017-7763                       | <a href="#">Resolución de 28 de junio de 2017, por la que se prohíbe temporalmente la pesca, tenencia a bordo y desembarque de ejemplares de atún rojo para la modalidad de pesca deportiva y recreativa.</a>                                                                                         | prohibición pesca deportiva y recreativa | atún rojo |

| Year | Law/<br>Regulation/<br>Recommendation | Description                                                                                                                                                                                                                                                                                               | Fishing Art      | Specie                      |
|------|---------------------------------------|-----------------------------------------------------------------------------------------------------------------------------------------------------------------------------------------------------------------------------------------------------------------------------------------------------------|------------------|-----------------------------|
| 2017 | BOE-A-2017-1815                       | <a href="#">Resolución de 15 de febrero de 2017, de la Secretaría General de Pesca, por la que se publica la asignación de cuotas de atún rojo y del censo específico de la flota autorizada para el ejercicio de la pesca del atún rojo.</a>                                                             |                  | atún rojo                   |
| 2017 | BOE-A-2017-3250                       | <a href="#">Orden APM/264/2017, de 23 de marzo, por la que se regula la pesquería de atún rojo en el Atlántico Oriental y Mediterráneo.</a>                                                                                                                                                               |                  | atún rojo                   |
| 2017 |                                       | <a href="#">Resolución de la Secretaría General de Pesca, por la que se modifica la Resolución de la Secretaría General de Pesca de 6 de marzo de 2017 por la que se establecen las disposiciones de aplicación del Plan de Atún Rojo en el Océano Atlántico Oriental y en el Mediterráneo para 2017.</a> |                  | atún rojo                   |
| 2017 |                                       | <a href="#">Resolución de la Secretaría General de Pesca, por la que se establecen las disposiciones de aplicación del plan de recuperación del atún rojo en el Océano Atlántico Oriental y en el Mar Mediterráneo para 2017</a>                                                                          |                  | atún rojo                   |
| 2018 | BOE-A-2018-6036                       | Orden APM/453/2018, de 25 de abril, por la que se modifica la Orden AAA/1406/2016, de 18 de agosto, por la que se establece un Plan de gestión para los buques de los censos del Caladero Nacional del Golfo de Cádiz.                                                                                    | Cerco y arrastre | Boquerón, sardina, langosta |
| 2018 | BOJA-2018-90-14                       | <a href="#">ORDEN de 27 de abril de 2018, por la que se adaptan las zonas de producción de moluscos bivalvos y otros invertebrados marinos de la Comunidad Autónoma de Andalucía, y se establecen disposiciones relativas a los controles oficiales de las mismas.</a>                                    |                  | moluscos                    |
| 2018 | BOE-A-2018-6885                       | Orden APM/515/2018, de 14 de mayo, por la que se corrigen errores en la Orden APM/453/2018, de 25 de abril, por la que se modifica la Orden AAA/1406/2016, de 18 de agosto, por la que se establece un Plan de gestión para los buques de los censos del Caladero Nacional del Golfo de Cádiz             | Plan de gestión  |                             |
| 2018 | BOE-A-2018-8930                       | Orden APA/683/2018, de 19 de junio, por la que se corrigen errores en la Orden APM/453/2018, de 25 de abril, por la que se modifica la Orden AAA/1406/2016, de 18 de agosto, por la que se establece un Plan de gestión para los buques de los censos del Caladero Nacional del Golfo de Cádiz            | Plan de gestión  |                             |
| 2018 | BOE-A-2017-3250                       | <a href="#">Orden APM/264/2017, de 23 de marzo, por la que se regula la pesquería de atún rojo en el Atlántico Oriental y Mediterráneo</a>                                                                                                                                                                |                  | atún rojo                   |

| Year | Law/<br>Regulation/<br>Recommendation | Description                                                                                                                                                                                                                                                                                                                                                                                                                                          | Fishing Art                              | Specie    |
|------|---------------------------------------|------------------------------------------------------------------------------------------------------------------------------------------------------------------------------------------------------------------------------------------------------------------------------------------------------------------------------------------------------------------------------------------------------------------------------------------------------|------------------------------------------|-----------|
| 2018 | BOE-A-2018-5380                       | Orden APM/400/2018, de 17 de abril, por la que se modifica la Orden APM/264/2017, de 23 de marzo, por la que se regula la pesquería de atún rojo en el Atlántico Oriental y Mediterráneo.                                                                                                                                                                                                                                                            |                                          | atún rojo |
| 2018 |                                       | <a href="#">Recomendación de ICCAT 17-07 para enmendar la recomendación 14-04 sobre el atún rojo en el Atlántico Este y Mediterráneo</a>                                                                                                                                                                                                                                                                                                             |                                          | atún rojo |
| 2018 |                                       | <a href="#">Resolución de 23 de abril de 2018, por la que se establecen las disposiciones de aplicación del plan de recuperación del atún rojo en el Océano Atlántico Oriental y Mediterráneo para 2018</a>                                                                                                                                                                                                                                          | Plan recuperación                        | atún rojo |
| 2018 | BOE-A-2018-9683                       | Resolución de 6 de julio de 2018, de la Secretaría General de Pesca, por la que se establecen disposiciones para la campaña atún rojo 2018 para los buques artesanales del Mediterráneo incluidos en el epígrafe c) del artículo 4.2 de la Orden APM/400/2018, de 17 de abril, por la que se modifica la Orden APM/264/2017, de 23 de marzo, por la que se regula la pesquería de atún rojo en el Atlántico Oriental y Mediterráneo.                 | artesanales                              | atún rojo |
| 2018 | BOE-A-2018-7273                       | <a href="#">Resolución de 21 de mayo de 2018, de la Secretaría General de Pesca, por la que se establecen disposiciones para la campaña del atún rojo 2018, para los buques artesanales del Estrecho</a>                                                                                                                                                                                                                                             | artesanales                              | atún rojo |
| 2018 | BOE-A-2018-9157                       | <a href="#">Resolución de 25 de junio de 2018 del Director General de Ordenación pesquera por la que se prohíbe temporalmente la pesca, tenencia a bordo y desembarque de ejemplares de atún rojo ( Thunnus thynnus ) para la modalidad de pesca deportiva y recreativa.</a>                                                                                                                                                                         | prohibición pesca deportiva y recreativa | atún rojo |
| 2018 | BOE-A-2018-9683                       | <a href="#">Resolución de 6 de julio de 2018, de la Secretaría General de Pesca, por la que se establecen disposiciones para la campaña atún rojo 2018 para los buques artesanales del Mediterráneo incluidos en el epígrafe c) del artículo 4.2 de la Orden APM/400/2018, de 17 de abril, por la que se modifica la Orden APM/264/2017, de 23 de marzo, por la que se regula la pesquería de atún rojo en el Atlántico Oriental y Mediterráneo.</a> | artesanales                              | atún rojo |
| 2018 | BOJA-2018-189-21                      | <a href="#">Resolución de 24 de septiembre de 2018, de la Dirección General de Pesca y Acuicultura, por la que se procede a la apertura de la pesquería de chirla (Chamelea gallina) en el Golfo de Cádiz.</a>                                                                                                                                                                                                                                       |                                          | chirla    |
| 2018 | BOJA-2018-196-48                      | <a href="#">Resolución de 1 de octubre de 2018, de la Dirección General de Pesca y Acuicultura, por la que se modifica parcialmente la Resolución de 24 de septiembre de 2018, de la Dirección</a>                                                                                                                                                                                                                                                   |                                          | chirla    |

| Year | Law/<br>Regulation/<br>Recommendation | Description                                                                                                                                                                                                                                                                                                                                                                                                           | Fishing Art       | Specie    |
|------|---------------------------------------|-----------------------------------------------------------------------------------------------------------------------------------------------------------------------------------------------------------------------------------------------------------------------------------------------------------------------------------------------------------------------------------------------------------------------|-------------------|-----------|
|      |                                       | <a href="#">General de Pesca y Acuicultura por la que se procede a la apertura de la pesquería de chirla(Chamelea gallina) en el Golfo de Cádiz.</a>                                                                                                                                                                                                                                                                  |                   |           |
| 2018 |                                       | <a href="#">Resolución de 9 de octubre de 2018, de la Secretaria General de Pesca, por la que se modifica la Resolución de la Secretaria General de Pesca de 23 de abril de 2018 por la que seestablecen las disposiciones de aplicación del Plan de atún rojo en el Océano Atlántico Oriental y el mar Mediterráneo para 2018</a>                                                                                    |                   | atún rojo |
| 2019 | BOE-A-2019-1867                       | <a href="#">Resolución de 28 de enero de 2019, de la Secretaría General de Pesca, por la que se establecen las cuotas iniciales para 2019 disponibles por modalidad o censo para las distintas especies contempladas en los planes de gestión de los buques censados en los caladeros nacionales del Cantábrico y Noroeste, Golfo de Cádiz, así como buques de arrastre de fondo que faenan en aguas de Portugal.</a> | Censo             |           |
| 2019 | BOJA-2019-22-12                       | <a href="#">Resolución de 30 de enero de 2019, de la Dirección General de Pesca y Acuicultura, por la que se modifica parcialmente la Resolución de 24 de septiembre de 2018, por la que se procede a la apertura de la pesquería de chirla (Chamelea gallina) en el Golfo de Cádiz.</a>                                                                                                                              |                   | chirla    |
| 2019 | BOE-A-2019-1789                       | <del><a href="#">Real Decreto 46/2019, de 8 de febrero, por el que se regula la pesquería de atún rojo en el Atlántico Oriental y el Mediterráneo.</a></del>                                                                                                                                                                                                                                                          |                   | atún rojo |
| 2019 | BOJA-2019-63-4                        | <a href="#">Orden de 27 de marzo de 2019, por la que se modifica la Orden de 29 de junio de 2017, por la que se regula el marisqueo desde embarcación con draga hidráulica en el Golfo de Cádiz estableciendo medidas técnicas a fin de alcanzar niveles de rendimiento máximo sostenible.</a>                                                                                                                        | draga hidráulica  |           |
| 2019 | BOJA-2019-67-20                       | <a href="#">Resolución de 4 de abril de 2019, de la Dirección General de Pesca y Acuicultura, por la que se cierra la pesquería de la chirla (Chamelea gallina) en aguas del Golfo de Cádiz.</a>                                                                                                                                                                                                                      |                   | chirla    |
| 2019 | BOE-A-2019-9219                       | <a href="#">Resolución de 20 de mayo, de la Secretaría General de Pesca, por la que se establecen las disposiciones de aplicación del Plan de Recuperación del Atún rojo en el Océano Atlántico Oriental y el Mar Mediterráneo para 2019</a>                                                                                                                                                                          | plan recuperación | atún rojo |
| 2019 | BOJA-2019-122-27                      | <a href="#">Resolución de 21 de junio de 2019, de la Dirección General de Pesca y Acuicultura, por la que se aprueba el plan de pesca de la pesquería de chirla (Chamelea gallina) en el Golfo de Cádiz para la campaña 2019-2020.</a>                                                                                                                                                                                |                   | chirla    |

|      |                 |                                                                                                                                                                                          |  |           |
|------|-----------------|------------------------------------------------------------------------------------------------------------------------------------------------------------------------------------------|--|-----------|
| 2019 | BOE-A-2019-9932 | <a href="#">Resolución de 28 de junio de 2019 del Director General de Ordenación Pesquera y Acuicultura por la que se prohíbe temporalmente la pesca, tenencia a bordo y desembarque</a> |  | atún rojo |
|------|-----------------|------------------------------------------------------------------------------------------------------------------------------------------------------------------------------------------|--|-----------|



| Year | Law/<br>Regulation/<br>Recommendation | Description                                                                                                                                                                                                                                                                                                                                 | Fishing Art       | Specie    |
|------|---------------------------------------|---------------------------------------------------------------------------------------------------------------------------------------------------------------------------------------------------------------------------------------------------------------------------------------------------------------------------------------------|-------------------|-----------|
|      |                                       | <a href="#">de ejemplares de atún rojo (Thunnus thynnus) para la modalidad de pesca deportiva y recreativa.</a>                                                                                                                                                                                                                             |                   |           |
| 2019 | BOE-A-2019-9219                       | <a href="#">Resolución de 20 de mayo, de la Secretaría General de Pesca, por la que se establecen las disposiciones de aplicación del Plan de Recuperación del Atún rojo en el Océano Atlántico Oriental y el Mar Mediterráneo para 2019</a>                                                                                                | plan recuperación | atún rojo |
| 2019 | BOE-A-2019-9932                       | <a href="#">Resolución de 28 de junio de 2019 del Director General de Ordenación Pesquera y Acuicultura por la que se prohíbe temporalmente la pesca, tenencia a bordo y desembarque de ejemplares de atún rojo (Thunnus thynnus) para la modalidad de pesca deportiva y recreativa.</a>                                                    |                   | atún rojo |
| 2019 | BOE-A-2019-6876                       | <a href="#">Resolución de 26 de abril de 2019, de la Secretaría General de Pesca, por la que se establecen disposiciones para la campaña atún rojo 2019 para la flota de la lista h), debuques artesanales en el Estrecho de captura limitada, del censo específico de la flota autorizada para el ejercicio de la pesca del atún rojo.</a> | artesanales       | atún rojo |

**Tabla S2.6.** Summary of fishing Regulations for the Mediterranean Sea

| Year | Law/<br>Regulation/<br>Recommendation | Description                                                                                                                                                                                                          | Fishing Art            | Specie |
|------|---------------------------------------|----------------------------------------------------------------------------------------------------------------------------------------------------------------------------------------------------------------------|------------------------|--------|
| 1980 |                                       |                                                                                                                                                                                                                      |                        |        |
| 1981 |                                       |                                                                                                                                                                                                                      |                        |        |
| 1982 |                                       |                                                                                                                                                                                                                      |                        |        |
| 1983 |                                       |                                                                                                                                                                                                                      |                        |        |
| 1984 | BOE-A-1985-226                        | Real Decreto 2349/1984 se regula la pesca de «Cerco»                                                                                                                                                                 | cerco                  |        |
| 1985 |                                       |                                                                                                                                                                                                                      |                        |        |
| 1986 |                                       |                                                                                                                                                                                                                      |                        |        |
| 1987 |                                       |                                                                                                                                                                                                                      |                        |        |
| 1988 | BOE-A-1988-16647                      | RD 679/1988 se regula el ejercicio de la pesca de arrastre de fondo en el Mediterráneo.                                                                                                                              | Arrastre               |        |
| 1989 |                                       |                                                                                                                                                                                                                      |                        |        |
| 1990 | BOE-A-1991-159                        | RD 1724/1990 Regulación de palangre de fondo en el litoral mediterráneo                                                                                                                                              | Palangre de Fondo      |        |
| 1990 | BOE-A-1990-25749                      | Orden de 22 de octubre de 1990 por la que se prohíbe el uso de las artes de deriva y se regula su empleo como artes menores en el área mediterránea                                                                  | Deriva y Artes menores |        |
| 1991 | BOE-A-1991-6200                       | Orden de 28 de febrero de 1991 por la que se modifica la de 22 de octubre de 1990 por la que se prohíbe el uso de los artes de deriva y se regula su empleo como artes menores en el área mediterránea               | Deriva y Artes menores |        |
| 1992 | BOE-A-1992-14524                      | Orden de 12 de junio de 1992 por la que se fijan las normas generales que han de regir la utilización de licencias de pesca para palangreros menores de 100 TRB en aguas de la zona VIIIa del CIEM                   | palangre               |        |
| 1992 | BOE-A-1992-15208                      | Orden de 12 de junio de 1992 por la que se modifica parcialmente la Orden de 22 de octubre de 1990, por la que se prohíbe el uso de artes de deriva y se regula su empleo como artes menores en el área mediterránea | Deriva y Artes menores |        |
| 1993 |                                       |                                                                                                                                                                                                                      |                        |        |

| Year | Law/<br>Regulation/<br>Recommendation | Description                                                                                                                                                                                                                  | Fishing Art            | Specie           |
|------|---------------------------------------|------------------------------------------------------------------------------------------------------------------------------------------------------------------------------------------------------------------------------|------------------------|------------------|
| 1994 | BOE-A-1994-12337                      | Orden de 27 de mayo de 1994 por la que se establece una veda temporal para el atún rojo en el mar Mediterráneo                                                                                                               | palangre de superficie | atún rojo        |
| 1995 |                                       |                                                                                                                                                                                                                              |                        |                  |
| 1996 |                                       |                                                                                                                                                                                                                              |                        |                  |
| 1997 |                                       |                                                                                                                                                                                                                              |                        |                  |
| 1998 | BOE-A-1998-2743                       | Real Decreto 71/1998 Se regula la pesca de túnidos y especies afines en el mediterráneo                                                                                                                                      |                        | Túnidos y afines |
| 1998 | BOE-A-1998-15708                      | Orden de 17 de junio de 1998 por la que se establece un plan específico de pesca con el arte denominado «voracera» en determinada zona del estrecho de Gibraltar.                                                            | voracera               | Voraz            |
| 1998 | BOE-A-1999-6380                       | Orden de 8 de marzo de 1999 por la que se regula la pesca con el arte de palangre de superficie en el caladero Mediterráneo                                                                                                  | Palangre de Superficie |                  |
| 1999 | BOE-A-1999-20641                      | Real Decreto 1440/1999, de 10 de septiembre, por el que se regula el ejercicio de la pesca con artes de arrastre de fondo en el caladero nacional del Mediterráneo                                                           | Arrastre               |                  |
| 1999 | BOE-A-1999-21970                      | Orden de 2 de noviembre de 1999 por la que se modifica la Orden de 17 de junio de 1998, por la que se establece un plan específico de pesca con el arte denominado "voracera" en determinada zona del estrecho de Gibraltar. |                        | Voraz            |
| 2000 |                                       |                                                                                                                                                                                                                              |                        |                  |
| 2001 |                                       |                                                                                                                                                                                                                              |                        |                  |
| 2002 | BOJA-2002-45-1                        | <a href="#">Ley 1/2002, de 4 de abril, de ordenación, fomento y control de la Pesca Marítima, el Marisqueo y la Acuicultura Marina.</a>                                                                                      |                        |                  |
| 2002 | BOE-A-2002-25439                      | Orden APA/3323/2002, de 20 de diciembre, por la que se establece un plan de pesca para la pesca del voraz en determinadas zonas del Estrecho de Gibraltar.                                                                   |                        | Voraz            |
| 2003 | BOJA-2003-65-7                        | Orden de 25 de marzo de 2003, por la que se establece las tallas mínimas de captura y épocas de veda para los moluscos bivalvos y gasterópodos de la Comunidad de marzo de Autónoma de Andalucía                             | veda marisco           |                  |

| Year | Law/<br>Regulation/<br>Recommendation | Description                                                                                                                                                                                                                                                              | Fishing Art           | Specie                                                                |
|------|---------------------------------------|--------------------------------------------------------------------------------------------------------------------------------------------------------------------------------------------------------------------------------------------------------------------------|-----------------------|-----------------------------------------------------------------------|
| 2003 | BOJA-2003-65-5                        | ORDEN de 25 de marzo de 2003, por la que se modifica la de 15 de julio de 1993, por la que se declaran las zonas de producción y protección o mejora de moluscos bivalvos, moluscos gasterópodos, tunicados y equinodermos marinos de la Comunidad Autónoma de Andalucía | veda marisco          | bivalvos,<br>moluscos<br>gasterópodos,<br>tunicados y<br>equinodermos |
| 2004 | BOE-A-2004-4777                       | Orden APA/678/2004, de 5 de marzo, por la que se regula la pesca con artes de cerco en el Caladero Nacional del Mediterráneo                                                                                                                                             | Cerco                 |                                                                       |
| 2004 | BOE-A-2004-12530                      | Orden APA/2179/2004, de 1 de julio, por la que se establece un plan para la pesca del pez sable en determinada zona del Estrecho de Gibraltar                                                                                                                            |                       | Pez sable                                                             |
| 2004 | BOJA-2004-52-3                        | <a href="#">Decreto 86/2004, de 2 de marzo, sobre Cofradías de Pescadores y sus Federaciones.</a>                                                                                                                                                                        |                       |                                                                       |
| 2005 | BOE-A-2005-1205                       | Orden APA/50/2005, de 20 de enero, por la que se establece un plan para la pesca del pez sable en determinada zona del Estrecho de Gibraltar                                                                                                                             |                       | Pez sable                                                             |
| 2005 | BOE-A-2005-5172                       | Orden APA/787/2005, de 22 de marzo, por la que se establece una veda temporal para la pesca de arrastre de fondo en el litoral Mediterráneo de Andalucía y se fijan fondos mínimos para esta misma modalidad en la provincia de Almería                                  | Arrastre              |                                                                       |
| 2005 | BOE-A-2005-16832                      | Orden APA/3128/2005, de 30 de septiembre, por la que se regula la intensidad lumínica de los focos de los buques y botes auxiliares dedicados a la pesca de cerco en el Mediterráneo                                                                                     | Cerco                 |                                                                       |
| 2006 | BOE-A-2006-18347                      | Orden APA/3238/2006, de 13 de octubre, por la que se establece un plan de pesca de arrastre de fondo en determinadas zonas del litoral surmediterráneo                                                                                                                   | Arrastre              |                                                                       |
| 2006 | BOE-A-2006-7028                       | Real Decreto 395/2006, de 31 de marzo, por el que se establecen medidas de ordenación de la flota pesquera que opera con artes fijos y artes menores en el Mediterráneo                                                                                                  | Artes fijos y menores |                                                                       |
| 2006 | BOE-A-2006-1231                       | Orden APA/79/2006, de 19 de enero, por la que se establece un plan integral de gestión para la conservación de los recursos pesqueros en el Mediterráneo                                                                                                                 | PLAN INTEGRAL         |                                                                       |
| 2006 | BOE-A-2006-23031                      | Orden APA/4006/2006, de 22 de diciembre, por la que se modifica la Orden APA/79/2006, de 19 de enero, por la que se establece un plan integral de gestión para la conservación de los recursos pesqueros en el Mediterráneo                                              | PLAN INTEGRAL         |                                                                       |

| Year | Law/<br>Regulation/<br>Recommendation | Description                                                                                                                                                                                                                                                                                                                                                                              | Fishing Art           | Specie              |
|------|---------------------------------------|------------------------------------------------------------------------------------------------------------------------------------------------------------------------------------------------------------------------------------------------------------------------------------------------------------------------------------------------------------------------------------------|-----------------------|---------------------|
| 2006 | BOE-A-2007-5444                       | Real Decreto 307/2007, de 2 de marzo, por el que se modifica el Real Decreto 395/2006, de 31 de marzo, por el que se establecen medidas de ordenación de la flota pesquera que opera con artes fijos y artes menores en el Mediterráneo por el que se establecen medidas de ordenación de la flota pesquera que opera con artes fijos y artes menores en el Mediterráneo (modifica 2006) | Artes fijos y menores |                     |
| 2007 | BOE-A-2007-1294                       | Orden APA/37/2007, de 15 de enero por la que se regula la pesca con artes fijos y artes menores en el Mediterráneo                                                                                                                                                                                                                                                                       | Artes fijos y menores |                     |
| 2007 | BOE-A-2007-5444                       | <a href="#">Real Decreto 307/2007, de 2 de marzo, por el que se modifica el Real Decreto 395/2006, de 31 de marzo, por el que se establecen medidas de ordenación de la flota pesquera que opera con artes fijos y artes menores en el Mediterráneo.</a>                                                                                                                                 | Artes fijos y menores |                     |
| 2008 | BOE-A-2008-1496                       | Orden APA/83/2008, de 23 de enero, por la que se modifica la Orden APA/678/2004, de 5 de marzo, por la que se regula la pesca con artes de cerco en el caladero nacional del Mediterráneo                                                                                                                                                                                                | cerco                 | Modifica la de 2004 |
| 2008 | BOE-A-2008-2182                       | Orden APA/254/2008, de 31 de enero, por la que se establece un Plan integral de gestión para la conservación de los recursos pesqueros en el Mediterráneo                                                                                                                                                                                                                                | Plan integral         |                     |
| 2008 | BOJA-2008-196-1                       | <a href="#">ORDEN de 23 de septiembre de 2008, por la que se establece el censo de embarcaciones marisqueras dedicadas a la captura de moluscos bivalvos y gasterópodos de Andalucía.</a>                                                                                                                                                                                                |                       |                     |
| 2009 | BOE-A-2009-21217                      | Orden ARM/3536/2009, de 23 de diciembre, por la que se establece un Plan de Pesca del Voraz en determinadas zonas del estrecho de Gibraltar. Regula la pesquería del voraz ( <i>Pagellus bogaraveo</i> ) en el estrecho de Gibraltar y se publica como continuación de los planes anteriores que ya habían prescrito                                                                     |                       | voraz               |
| 2009 | BOE-A-2009-2547                       | Orden ARM/250/2009, de 12 de febrero, por la que se establece una parada temporal para las flotas incluidas en el Plan Integral de Gestión para la Conservación de los Recursos Pesqueros en el Mediterráneo.                                                                                                                                                                            | Parada temporal       |                     |
| 2009 | BOE-A-2009-7047                       | Orden ARM/1020/2009, de 22 de abril, por la que se modifica la Orden APA/678/2004, de 5 de marzo, por la que se regula la pesca con artes de cerco en el Caladero Nacional del Mediterráneo                                                                                                                                                                                              | cerco                 |                     |

| Year | Law/<br>Regulation/<br>Recommendation | Description                                                                                                                                                                                                                                                                                                                                                                                                                                                                                                                                                                 | Fishing Art                                          | Specie   |
|------|---------------------------------------|-----------------------------------------------------------------------------------------------------------------------------------------------------------------------------------------------------------------------------------------------------------------------------------------------------------------------------------------------------------------------------------------------------------------------------------------------------------------------------------------------------------------------------------------------------------------------------|------------------------------------------------------|----------|
| 2010 | BOE-A-2010-1546                       | Orden ARM/143/2010, de 25 de enero, por la que se establece un Plan Integral de Gestión para la conservación de los recursos pesqueros en el Mediterráneo                                                                                                                                                                                                                                                                                                                                                                                                                   | PLAN INTEGRAL                                        |          |
| 2010 | BOE-A-2010-11986                      | Orden ARM/2023/2010, de 14 de julio, por la que se modifica la Orden ARM/143/2010, de 25 de enero, por la que se establece un Plan Integral de Gestión para la conservación de los recursos pesqueros en el Mediterráneo                                                                                                                                                                                                                                                                                                                                                    |                                                      |          |
| 2010 | BOJA-2010-214-1                       | Decreto 387/2010, de 19 de octubre regula el marisqueo en el litoral de la Comunidad Autónoma de Andalucía.                                                                                                                                                                                                                                                                                                                                                                                                                                                                 |                                                      | Moluscos |
| 2011 | BOE-A-2011-15094                      | Orden ARM/2529/2011, de 21 de septiembre, por la que se regula la pesca con artes de cerco en el caladero Mediterráneo                                                                                                                                                                                                                                                                                                                                                                                                                                                      | Cerco                                                |          |
| 2011 |                                       | <a href="#"><u>Reglamento (UE) Nº 1343/2011 del Parlamento Europeo y del Consejo, de 13 de diciembre de 2011 sobre determinadas disposiciones aplicables a la pesca en la zona del Acuerdo CGPM (Comisión General de Pesca del Mediterráneo) y por el que se modifica el Reglamento (CE) n.º 1967/2006 del Consejo, relativo a las medidas de gestión para la explotación sostenible de los recursos pesqueros en el Mar Mediterráneo.</u></a>                                                                                                                              |                                                      |          |
| 2012 | BOE-A-2012-15740                      | Orden AAA/2808/2012, de 21 de diciembre, por la que se establece un Plan de Gestión Integral para la conservación de los recursos pesqueros en el Mediterráneo afectados por las pesquerías realizadas con redes de cerco, redes de arrastre y artes fijos y menores, para el período 2013-2017, de 21 de diciembre, por la que se establece un Plan de Gestión Integral para la conservación de los recursos pesqueros en el Mediterráneo afectados por las pesquerías realizadas con redes de cerco, redes de arrastre y artes fijos y menores, para el período 2013-2017 | PLAN INTEGRAL<br>cerco, arrastre, fijos<br>y menores |          |
| 2012 | BOE-A-2012-15654                      | Orden AAA/2793/2012, de 21 de diciembre, por la que se modifica la Orden ARM/2529/2011, de 21 de septiembre, por la que se regula la pesca con artes de cerco en el Caladero Mediterráneo                                                                                                                                                                                                                                                                                                                                                                                   | cerco                                                |          |
| 2012 | BOE-A-2012-15655                      | Orden AAA/2794/2012, de 21 de diciembre, por la que se regula la pesca con artes fijos y artes menores en las aguas exteriores del Mediterráneo                                                                                                                                                                                                                                                                                                                                                                                                                             | Artes fijos y<br>menores                             |          |

| Year | Law/<br>Regulation/<br>Recommendation | Description                                                                                                                                                                                                                                                                                         | Fishing Art                                                 | Specie |
|------|---------------------------------------|-----------------------------------------------------------------------------------------------------------------------------------------------------------------------------------------------------------------------------------------------------------------------------------------------------|-------------------------------------------------------------|--------|
| 2012 | BOE-A-2012-9652                       | Orden AAA/1589/2012, de 17 de julio, por la que se regula la pesquería del voraz ( <i>Pagellus bogaraveo</i> ) con el arte denominado voracera en el Estrecho de Gibraltar.                                                                                                                         | voracera                                                    |        |
| 2012 | BOJA-2012-59-5                        | <a href="#">Decreto 64/2012, de 13 de marzo, por el que se regulan las jornadas y horarios de las actividades de marisqueo y pesca profesional y el sistema de localización y seguimiento de embarcaciones pesqueras andaluzas</a>                                                                  |                                                             |        |
| 2013 | BOE-A-2013-3893                       | Resolución de 27 de marzo de 2013, de la Secretaría General de Pesca, por la que publican los censos actualizados de las modalidades de arrastre de fondo, artes menores, cerco y palangre de fondo del caladero Mediterráneo                                                                       | arrastre de fondo, artes menores, cerco y palangre de fondo |        |
| 2014 | BOJA-2015-6-8                         | <a href="#">Orden de 29 de diciembre de 2014, por la que se modifica la de 24 de marzo 2014, por la que se establece un plan de gestión para la pesquería de rastros o dragas mecanizadas en el litoral mediterráneo de Andalucía.</a>                                                              | rastros y dragas                                            |        |
| 2014 |                                       | <a href="#">Recomendación 16-05 de ICCAT que sustituye a la Recomendación 13-04 y establece un plan de recuperación plurianual para el pez espada del Mediterráneo.</a>                                                                                                                             |                                                             |        |
| 2015 | BOJA-2015-115-3                       | <a href="#">Orden de 10 de junio de 2015, por la que se modifica la de 23 de julio de 2009, por la que se establecen las normas básicas de intervención del Fondo Europeo de la Pesca 2007-2013 para el Desarrollo Sostenible de las Zonas de Pesca en la Comunidad Autónoma de Andalucía</a>       | Fondos Europeos                                             |        |
| 2015 | BOJA-2015-44-4                        | <a href="#">Decreto 99/2015, de 3 de marzo, por el que se modifica el Decreto 387/2010, de 19 de octubre, por el que se regula el marisqueo en el litoral de la Comunidad Autónoma de Andalucía</a>                                                                                                 | moluscos                                                    |        |
| 2015 |                                       | <a href="#">Reglamento (UE) Nº 2102/2015 del Parlamento Europeo y del Consejo, de 28 de octubre de 2015 por el que se modifica el Reglamento (UE) no 1343/2011 sobre determinadas disposiciones aplicables a la pesca en la zona del Acuerdo CGPM (Comisión General de Pesca del Mediterráneo).</a> |                                                             |        |
| 2016 | BOE-A-2016-803                        | <a href="#">Orden AAA/55/2016, de 26 de enero, por la que se modifica la Orden AAA/1589/2012, de 17 de julio, por la que se regula la pesquería del voraz (<i>Pagellus bogaraveo</i>) con el arte denominado voracera en el Estrecho de Gibraltar.</a>                                              | voracera                                                    | voraz  |

| Year | Law/<br>Regulation/<br>Recommendation | Description                                                                                                                                                                                                                                                                                                                                                                                                                      | Fishing Art       | Specie     |
|------|---------------------------------------|----------------------------------------------------------------------------------------------------------------------------------------------------------------------------------------------------------------------------------------------------------------------------------------------------------------------------------------------------------------------------------------------------------------------------------|-------------------|------------|
| 2016 | BOJA-2016-41-2                        | <a href="#">Orden de 19 de febrero de 2016, por la que se regulan los artes de trampa para la captura de pulpo (Octopus vulgaris) en el litoral mediterráneo de Andalucía y se crea el censo de embarcaciones autorizadas para dicha actividad.</a>                                                                                                                                                                              |                   |            |
| 2016 | BOJA-2016-41-5                        | <a href="#">Orden de 24 de febrero de 2016, por la que se establecen medidas para la conservación del pulpo (Octopus vulgaris) en las aguas interiores del litoral mediterráneo de Andalucía.</a>                                                                                                                                                                                                                                |                   |            |
| 2016 |                                       | <a href="#">Resolución de 22 de diciembre de 2016, para aplicación de la Recomendación ICCAT 16-05, que establece un plan de recuperación plurianual para el pez espada del Mediterráneo.</a>                                                                                                                                                                                                                                    | Plan recuperación | Pez Espada |
| 2016 |                                       | <a href="#">Resolución de la Secretaría General de Pesca, por la que se establecen las disposiciones de aplicación del plan de recuperación del atún rojo en el Océano Atlántico Oriental y el Mar Mediterráneo para 2016</a>                                                                                                                                                                                                    | Plan recuperación | atún rojo  |
| 2016 |                                       | <a href="#">Resolución de la Secretaría General de Pesca, por la que se modifica la Resolución de la Secretaría General de Pesca, por la que se establecen las disposiciones de aplicación del plan de recuperación del atún rojo en el Océano Atlántico Oriental y el Mar Mediterráneo para 2016</a>                                                                                                                            | Plan recuperación | atún rojo  |
| 2016 |                                       |                                                                                                                                                                                                                                                                                                                                                                                                                                  |                   |            |
| 2017 |                                       | <a href="#">Resolución de 13 de febrero de 2017, de la Secretaría General de Pesca, por la que se establecen los puertos designados para desembarque de pez espada en el Mediterráneo.</a>                                                                                                                                                                                                                                       |                   | Pez Espada |
| 2017 | BOJA-2017-52-8                        | Orden de 13 de marzo de 2017, por la que se establecen las bases reguladoras para la concesión de subvenciones en régimen de concurrencia competitiva a la paralización temporal de la flota de artes menores afectada por el Plan de Gestión para la pesquería de rastros o dragas mecanizadas en el litoral mediterráneo de Andalucía, en el marco del Programa Operativo del Fondo Europeo Marítimo y de la Pesca (2014-2020) | draga, rastro     |            |
| 2017 | BOJA-2017-44-25                       | <a href="#">Orden de 1 de marzo de 2017, por la que se modifica la de 24 de marzo de 2014, por la que se establece un plan de gestión para la pesquería de rastros o dragas mecanizadas en el litoral mediterráneo de Andalucía</a>                                                                                                                                                                                              | draga, rastro     |            |
| 2017 | BOJA-2017-76-6                        | <a href="#">Decreto 58/2017, de 18 de abril, por el que se regula la acuicultura marina en Andalucía</a>                                                                                                                                                                                                                                                                                                                         | Acuicultura       |            |



| Year | Law/<br>Regulation/<br>Recommendation | Description                                                                                                                                                                                                                                                                                               | Fishing Art                              | Specie     |
|------|---------------------------------------|-----------------------------------------------------------------------------------------------------------------------------------------------------------------------------------------------------------------------------------------------------------------------------------------------------------|------------------------------------------|------------|
| 2017 | BOJA-2017-228-29                      | <a href="#">Orden de 23 de noviembre de 2017, por la que se adaptan las jornadas y los horarios de las actividades de marisqueo y pesca profesional en el litoral andaluz.</a>                                                                                                                            |                                          |            |
| 2017 |                                       | <a href="#">Resolución de 13 de febrero de 2017, de la Secretaría General de Pesca, por la que se establecen los puertos designados para desembarque de pez espada en el Mediterráneo.</a>                                                                                                                |                                          | pez espada |
| 2017 |                                       | <a href="#">Resolución de 28 de marzo de 2017 que modifica la Resolución de 13 de febrero , por la que se establecen los puertos designados para desembarque de pez espada.</a>                                                                                                                           |                                          | pez espada |
| 2017 | BOE-A-2017-9987                       | <a href="#">Resolución de 17 de agosto de 2017, por la que se prohíbe la pesca, tenencia a bordo y desembarque de ejemplares de atún rojo para la modalidad de pesca deportiva y recreativa.</a>                                                                                                          | prohibición pesca deportiva y recreativa | atún rojo  |
| 2017 | BOE-A-2017-7763                       | <a href="#">Resolución de 28 de junio de 2017, por la que se prohíbe temporalmente la pesca, tenencia a bordo y desembarque de ejemplares de atún rojo para la modalidad de pesca deportiva y recreativa.</a>                                                                                             | prohibición pesca deportiva y recreativa | atún rojo  |
| 2017 | BOE-A-2017-1815                       | <a href="#">Resolución de 15 de febrero de 2017, de la Secretaría General de Pesca, por la que se publica la asignación de cuotas de atún rojo y del censo específico de la flota autorizada para el ejercicio de la pesca del atún rojo.</a>                                                             |                                          | atún rojo  |
| 2017 | BOE-A-2017-3250                       | <a href="#">Orden APM/264/2017, de 23 de marzo, por la que se regula la pesquería de atún rojo en el Atlántico Oriental y Mediterráneo.</a>                                                                                                                                                               |                                          | atún rojo  |
| 2017 |                                       | <a href="#">Resolución de la Secretaría General de Pesca, por la que se modifica la Resolución de la Secretaría General de Pesca de 6 de marzo de 2017 por la que se establecen las disposiciones de aplicación del Plan de Atún Rojo en el Océano Atlántico Oriental y en el Mediterráneo para 2017.</a> |                                          | atún rojo  |
| 2017 |                                       | <a href="#">Resolución de la Secretaría General de Pesca, por la que se establecen las disposiciones de aplicación del plan de recuperación del atún rojo en el Océano Atlántico Oriental y en el Mar Mediterráneo para 2017</a>                                                                          |                                          | atún rojo  |

| Year | Law/<br>Regulation/<br>Recommendation | Description                                                                                                                                                                                                                                                                                                                                                                                                                          | Fishing Art                                          | Specie    |
|------|---------------------------------------|--------------------------------------------------------------------------------------------------------------------------------------------------------------------------------------------------------------------------------------------------------------------------------------------------------------------------------------------------------------------------------------------------------------------------------------|------------------------------------------------------|-----------|
| 2018 | BOE-A-2018-90                         | Orden APM/1322/2017, de 29 de diciembre, por la que se prorroga la vigencia de la Orden AAA/2808/2012, de 21 de diciembre, por la que se establece un Plan de Gestión Integral para la conservación de los recursos pesqueros en el Mediterráneo afectados por las pesquerías realizadas con redes de cerco, redes de arrastre y artes fijos y menores, para el período 2013-2017                                                    | PLAN INTEGRAL<br>cerco, arrastre, fijos<br>y menores |           |
| 2018 | BOE-A-2018-15723                      | Orden APA/1206/2018, de 14 de noviembre, por la que se prorroga la vigencia de la Orden AAA/2808/2012, de 21 de diciembre, por la que se establece un Plan de Gestión Integral para la conservación de los recursos pesqueros en el Mediterráneo afectados por las pesquerías realizadas con redes de cerco, redes de arrastre y artes fijos y menores, para el período 2013-2017                                                    | PLAN INTEGRAL<br>cerco, arrastre, fijos<br>y menores |           |
| 2018 | BOE-A-2017-3250                       | <a href="#">Orden APM/264/2017, de 23 de marzo, por la que se regula la pesquería de atún rojo en el Atlántico Oriental y Mediterráneo</a>                                                                                                                                                                                                                                                                                           |                                                      | atún rojo |
| 2018 | BOE-A-2018-5380                       | Orden APM/400/2018, de 17 de abril, por la que se modifica la Orden APM/264/2017, de 23 de marzo, por la que se regula la pesquería de atún rojo en el Atlántico Oriental y Mediterráneo.                                                                                                                                                                                                                                            |                                                      | atún rojo |
| 2018 | BOJA-2018-90-14                       | <a href="#">ORDEN de 27 de abril de 2018, por la que se adaptan las zonas de producción de moluscos bivalvos y otros invertebrados marinos de la Comunidad Autónoma de Andalucía, y se establecen disposiciones relativas a los controles oficiales de las mismas.</a>                                                                                                                                                               |                                                      | moluscos  |
| 2018 |                                       | <a href="#">Recomendación de ICCAT 17-07 para enmendar la recomendación 14-04 sobre el atún rojo en el Atlántico Este y Mediterráneo</a>                                                                                                                                                                                                                                                                                             |                                                      | atún rojo |
| 2018 |                                       | <a href="#">Resolución de 23 de abril de 2018, por la que se establecen las disposiciones de aplicación del plan de recuperación del atún rojo en el Océano Atlántico Oriental y Mediterráneo para 2018</a>                                                                                                                                                                                                                          | Plan recuperación                                    | atún rojo |
| 2018 | BOE-A-2018-9683                       | Resolución de 6 de julio de 2018, de la Secretaría General de Pesca, por la que se establecen disposiciones para la campaña atún rojo 2018 para los buques artesanales del Mediterráneo incluidos en el epígrafe c) del artículo 4.2 de la Orden APM/400/2018, de 17 de abril, por la que se modifica la Orden APM/264/2017, de 23 de marzo, por la que se regula la pesquería de atún rojo en el Atlántico Oriental y Mediterráneo. | artesanales                                          | atún rojo |

| Year | Law/<br>Regulation/<br>Recommendation | Description                                                                                                                                                                                                                                                                                                                                                                                                                                          | Fishing Art                                    | Specie    |
|------|---------------------------------------|------------------------------------------------------------------------------------------------------------------------------------------------------------------------------------------------------------------------------------------------------------------------------------------------------------------------------------------------------------------------------------------------------------------------------------------------------|------------------------------------------------|-----------|
| 2018 | BOE-A-2018-7273                       | <a href="#">Resolución de 21 de mayo de 2018, de la Secretaría General de Pesca, por la que se establecen disposiciones para la campaña del atún rojo 2018, para los buques artesanales del Estrecho</a>                                                                                                                                                                                                                                             | artesanales                                    | atún rojo |
| 2018 | BOE-A-2018-9157                       | <a href="#">Resolución de 25 de junio de 2018 del Director General de Ordenación pesquera por la que se prohíbe temporalmente la pesca, tenencia a bordo y desembarque de ejemplares de atún rojo ( Thunnus thynnus ) para la modalidad de pesca deportiva y recreativa.</a>                                                                                                                                                                         | prohibición pesca deportiva y recreativa       | atún rojo |
| 2018 | BOE-A-2018-9683                       | <a href="#">Resolución de 6 de julio de 2018, de la Secretaría General de Pesca, por la que se establecen disposiciones para la campaña atún rojo 2018 para los buques artesanales del Mediterráneo incluidos en el epígrafe c) del artículo 4.2 de la Orden APM/400/2018, de 17 de abril, por la que se modifica la Orden APM/264/2017, de 23 de marzo, por la que se regula la pesquería de atún rojo en el Atlántico Oriental y Mediterráneo.</a> | artesanales                                    | atún rojo |
| 2018 |                                       | <a href="#">Resolución de 9 de octubre de 2018, de la Secretaria General de Pesca, por la que se modifica la Resolución de la Secretaria General de Pesca de 23 de abril de 2018 por la que se establecen las disposiciones de aplicación del Plan de atún rojo en el Océano Atlántico Oriental y el mar Mediterráneo para 2018</a>                                                                                                                  |                                                | atún rojo |
| 2019 | BOE-A-2019-18598                      | Orden APA/1254/2019, de 20 de diciembre, por la que se prorroga la vigencia de la Orden AAA/2808/2012, de 21 de diciembre, por la que se establece un Plan de Gestión Integral para la conservación de los recursos pesqueros en el mar Mediterráneo afectados por las pesquerías realizadas con redes de cerco, redes de arrastre y artes fijos y menores, para el período 2013-2017                                                                | PLAN INTEGRAL cerco, arrastre, fijos y menores |           |
| 2019 | BOE-A-2019-4810                       | <a href="#">Orden APA/380/2019, de 26 de marzo, por la que se regulan las paradas temporales para la modalidad de arrastre de fondo y cerco en determinadas zonas del litoral Mediterráneo.</a>                                                                                                                                                                                                                                                      | arrastre y cerco                               |           |
| 2019 | BOE-A-2019-1789                       | <a href="#">Real Decreto 46/2019, de 8 de febrero, por el que se regula la pesquería de atún rojo en el Atlántico Oriental y el Mediterráneo.</a>                                                                                                                                                                                                                                                                                                    |                                                | atún rojo |

| Year | Law/<br>Regulation/<br>Recommendation | Description                                                                                                                                                                                                                                                                                                                                                                           | Fishing Art       | Specie    |
|------|---------------------------------------|---------------------------------------------------------------------------------------------------------------------------------------------------------------------------------------------------------------------------------------------------------------------------------------------------------------------------------------------------------------------------------------|-------------------|-----------|
| 2019 | BOE-A-2019-3549                       | <a href="#">Resolución de 4 de marzo de 2019, de la Secretaría General de Pesca, por la que se publica la asignación de cuotas de atún rojo y el censo específico de la flota autorizada para el ejercicio de la pesca del atún rojo creado por el Real Decreto 46/2019, de 8 de febrero, por el que se regula la pesquería de atún rojo en el Atlántico Oriental y Mediterráneo.</a> |                   | atún rojo |
| 2019 | BOE-A-2019-4943                       | <a href="#">Resolución de 29 de marzo de 2019, de la Secretaría General de Pesca, por la que se establecen disposiciones para la campaña atún rojo 2019 para la flota de la lista g), de artes menores del Mediterráneo, del censo específico de la flota autorizada para el ejercicio de la pesca del atún roj</a>                                                                   | artes menores     | atún rojo |
| 2019 | BOE-A-2019-6876                       | <a href="#">Resolución de 26 de abril de 2019, de la Secretaría General de Pesca, por la que se establecen disposiciones para la campaña atún rojo 2019 para la flota de la lista h), de buques artesanales en el Estrecho de captura limitada, del censo específico de la flota autorizada para el ejercicio de la pesca del atún rojo.</a>                                          | artesanales       | atún rojo |
| 2019 |                                       | <a href="#">Recomendación 18-02 de ICCAT que establece un Plan de Ordenación Plurianual para el atún rojo en el Atlántico Este y Mar Mediterráneo.</a>                                                                                                                                                                                                                                |                   | atún rojo |
| 2019 | BOE-A-2019-9219                       | <a href="#">Resolución de 20 de mayo, de la Secretaría General de Pesca, por la que se establecen las disposiciones de aplicación del Plan de Recuperación del Atún rojo en el Océano Atlántico Oriental y el Mar Mediterráneo para 2019</a>                                                                                                                                          | plan recuperación | atún rojo |
| 2019 | BOE-A-2019-9932                       | <a href="#">Resolución de 28 de junio de 2019 del Director General de Ordenación Pesquera y Acuicultura por la que se prohíbe temporalmente la pesca, tenencia a bordo y desembarque de ejemplares de atún rojo (Thunnus thynnus) para la modalidad de pesca deportiva y recreativa.</a>                                                                                              |                   | atún rojo |

**Tabla S2.7.** Summary of the Regulations related with the management of the marine protected areas of Andalucía

| Year | Law/Royal Decree | Description                                                                                                                                                                                                                                                                                                          | Marine Protected Area |
|------|------------------|----------------------------------------------------------------------------------------------------------------------------------------------------------------------------------------------------------------------------------------------------------------------------------------------------------------------|-----------------------|
| 1995 | BOE-A-1995-16955 | <a href="#">ORDEN de 3 de julio de 1995, por la que se establece la reserva marina de Cabo de Gata - Níjar. (B.O.E. Núm 165, de 12 de julio de 1995)</a>                                                                                                                                                             | Cabo de Gata          |
| 1996 | BOE-A-1996-19710 | <a href="#">ORDEN de 31 de julio de 1996 por la que se modifica la Orden de 3 de julio de 1996, por la que se establece la reserva marina de Cabo de Gata - Níjar. (B.O.E.núm. 207 de 27 de agosto de 1996)</a>                                                                                                      | Cabo de Gata          |
| 1997 | BOE-A-1997-18953 | <a href="#">ORDEN de 31 de julio de 1997 por la que se establece una reserva marina y una reserva de pesca en el entorno de la isla de Alborán.</a>                                                                                                                                                                  | Isla de Alborán       |
| 1998 | BOE-A-1998-22628 | <a href="#">ORDEN de 8 de septiembre de 1998 por la que se establece una reserva marina y una reserva de pesca en el entorno de la isla de Alborán y se regula el ejercicio de la pesca en los caladeros adyacentes.</a>                                                                                             | Isla de Alborán       |
| 2001 | BOE-A-2001-10147 | <a href="#">ORDEN de 11 de mayo de 2001, por la que se modifica la Orden de 3 de julio de 1995, por la que se estable la reserva marina de Cabo de Gata - Níjar. (B.O.E. núm.128 de 29 de mayo 2001)</a>                                                                                                             | Cabo de Gata          |
| 2001 | BOE-A-2001-11792 | <a href="#">ORDEN de 6 de junio de 2001 por la que se modifica la Orden de 8 de septiembre de 1998, por la que se establece una reserva marina y una reserva de pesca en el entorno de la isla de Alborán y se regula el ejercicio de la pesca en los caladeros adyacentes.</a>                                      | Isla de Alborán       |
| 2004 | BOJA-2004-123-3  | <a href="#">ORDEN de 16 de junio de 2004, por la que se declara una Reserva de Pesca en la desembocadura del río Guadalquivir.</a>                                                                                                                                                                                   | Golfo de Cádiz        |
| 2005 | BOJA-2005-14-1   | <a href="#">ORDEN de 11 de enero de 2005, por la que se modifica la de 16 de junio de 2004, por la que se declara una Reserva de Pesca en la desembocadura del río Guadalquivir.</a>                                                                                                                                 | Golfo de Cádiz        |
| 2007 | BOJA-2007-102-13 | <a href="#">Resolución de 2 de mayo de 2007, de la Dirección General de Pesca y Acuicultura, por la que se hace pública la relación de embarcaciones autorizadas para el ejercicio de la actividad de pesca con artes menores en la zonas B y C de la Reserva de Pesca de la desembocadura del río Guadalquivir.</a> | Golfo de Cádiz        |
| 2010 | BOJA-2010-135-4  | <a href="#">ORDEN de 6 de julio de 2010, por la que se modifica la de 16 de junio de 2004, por la que se declara una Reserva de Pesca en la desembocadura del río Guadalquivir.</a>                                                                                                                                  | Golfo de Cádiz        |

| Year | Law/Royal Decree | Description                                                                                                                                                                                                                                                                                    | Marine Protected Area |
|------|------------------|------------------------------------------------------------------------------------------------------------------------------------------------------------------------------------------------------------------------------------------------------------------------------------------------|-----------------------|
| 2011 | BOE-A-2011-10923 | <a href="#"><u>ORDEN ARM/1744/2011, de 15 de junio, por la que se regula la reserva marina de Cabo de Gata-Níjar, y se define su delimitación y usos permitidos (BOE núm 149 de 23 de junio de 2011).</u></a>                                                                                  | Cabo de Gata          |
| 2013 | BOE-A-2013-3623  | <a href="#"><u>ORDEN AAA/529/2013, de 2 de abril, por la que se modifica la Orden ARM/1744/2011, de 15 de junio, por la que se regula la reserva marina de Cabo de Gata-Níjar, y se define su delimitación y usos permitidos</u></a>                                                           | Cabo de Gata          |
| 2015 | BOE-A-2015-820   | <a href="#"><u>ORDEN AAA/77/2015, de 21 de enero, por la que se modifica la Orden ARM/1744/2011, de 15 de junio, por la que se regula la reserva marina de Cabo de Gata-Níjar y se define su delimitación y usos permitidos</u></a>                                                            | Cabo de Gata          |
| 2017 | BOE-A-2017-14367 | <a href="#"><u>RESOLUCIÓN de 23 de noviembre de 2017, de la Secretaría General de Pesca, por la que se actualiza el censo de buques autorizados a ejercer la pesca marítima profesional en la modalidad de cerco en la reserva marina de Cabo de Gata-Níjar</u></a>                            | Cabo de Gata          |
| 2017 | BOE-A-2017-14368 | <a href="#"><u>RESOLUCIÓN de 23 de noviembre de 2017, de la Secretaría General de Pesca, por la que se actualiza el censo de embarcaciones autorizadas a ejercer la pesca marítima profesional de artes menores en la Reserva Marina de Cabo de Gata-Níjar</u></a>                             | Cabo de Gata          |
| 2018 | BOE-A-2018-14660 | <a href="#"><u>RESOLUCIÓN de 4 de octubre de 2018, de la Secretaría General de Pesca, por la que se actualiza el censo de buques autorizados a ejercer la pesca, en la modalidad de arrastre de fondo, en el caladero de Alborán y su reserva de pesca.</u></a>                                | Isla de Alborán       |
| 2018 | BOE-A-2018-10097 | <a href="#"><u>ORDEN APA/767/2018, de 19 de junio, por la que se modifica la Orden de 8 de septiembre de 1998, por la que se establece una reserva marina y una reserva de pesca en el entorno de la isla de Alborán y se regula el ejercicio de la pesca en los caladeros adyacentes.</u></a> | Isla de Alborán       |

**Tabla S2.8.** Summary of the Fisheries Regulations at Regional level: Galicia

| Year | Regulation                                                                                                                                                                                                                                                                                |
|------|-------------------------------------------------------------------------------------------------------------------------------------------------------------------------------------------------------------------------------------------------------------------------------------------|
| 1985 | Lei 2/1985, do 26 de febreiro, de ordenación de pesca marítima en augas da Comunidade Autónoma de Galicia.                                                                                                                                                                                |
|      | Lei 13/1985, do 2 de outubro, sobre sancións accesorias en materia de pesca, marisqueo e cultivos mariños.                                                                                                                                                                                |
| 1986 |                                                                                                                                                                                                                                                                                           |
| 1987 |                                                                                                                                                                                                                                                                                           |
| 1988 |                                                                                                                                                                                                                                                                                           |
| 1989 |                                                                                                                                                                                                                                                                                           |
| 1990 |                                                                                                                                                                                                                                                                                           |
| 1991 |                                                                                                                                                                                                                                                                                           |
| 1992 | Lei 7/1992, do 24 de xullo, de pesca fluvial.                                                                                                                                                                                                                                             |
| 1993 | Lei 6/1993, do 11 de maio, de pesca de Galicia.                                                                                                                                                                                                                                           |
|      | Lei 9/1993, do 8 de xullo, de confrarías de pescadores de Galicia.                                                                                                                                                                                                                        |
| 1994 |                                                                                                                                                                                                                                                                                           |
| 1995 | <a href="#">Lei 1/1995, do 2 de xaneiro, de protección ambiental de Galicia</a>                                                                                                                                                                                                           |
|      | Decreto 116/1995, do 31 de marzo, polo que se regula o control das biotoxinas en moluscos bivalvos e outros organismos procedentes da pesca, o marisqueo e a acuicultura.                                                                                                                 |
| 1996 | Decreto 77/1996, do 29 de febreiro, sobre asunción de funcións e servizos transferidos á Comunidade Autónoma de Galicia mediante Real decreto 89/1996, do 26 de xaneiro, en materia de ensinanzas náutico– deportivas e a súa asignación á Consellería de Pesca, Marisqueo e Acuicultura. |
|      | Decreto 123/1996, do 14 de marzo, polo que se modifica o Decreto 278/1994, do 8 de setembro, polo que se establece o programa de axudas con finalidade estrutural no sector da pesca, a acuicultura e a transformación e comercialización dos seus produtos.                              |
|      | Decreto 155/1996, do 9 de maio, polo que se regulan os horarios do persoal adscrito ó servizo de protección de recursos da Consellería de Pesca, Marisqueo e Acuicultura.                                                                                                                 |

| Year | Regulation                                                                                                                                                                                                                                                                                                                            |
|------|---------------------------------------------------------------------------------------------------------------------------------------------------------------------------------------------------------------------------------------------------------------------------------------------------------------------------------------|
| 1997 | Decreto 98/1997, do 14 de marzo, polo que se modifica o Decreto 116/1995, do 31 de marzo, polo que se regula o control das biotoxinas en moluscos bivalvos e outros organismos procedentes da pesca, o marisqueo e a acuicultura.                                                                                                     |
|      | Decreto 130/1997, do 14 de maio, polo que se aproba o Regulamento de ordenación da pesca fluvial e dos ecosistemas acuáticos continentais.                                                                                                                                                                                            |
|      | Decreto 241/1997, do 10 de setembro, polo que se regula o procedemento para a renovación de licencias de caza e pesca fluvial.                                                                                                                                                                                                        |
|      | Decreto 278/1997, do 1 de outubro, polo que se regula a cobertura provisional das prazas de secretario das confrarías de pescadores.                                                                                                                                                                                                  |
|      | Decreto 287/1997, do 9 de outubro, sobre asunción de funcións e servizos transferidos á Comunidade Autónoma de Galicia en materia de mergullo profesional e de ensino profesional náutico–pesqueiro, polos reais decretos 1377/1997 e 1378/1997, respectivamente, e a súa asignación á Consellería de Pesca, Marisqueo e Acuicultura. |
| 1998 | Decreto 79/1998, do 12 de febreiro, polo que se regula a estrutura, organización e funcionamento das confrarías de pescadores de Galicia.                                                                                                                                                                                             |
|      | Orde do 7 de maio de 1998 pola que se regula o Rexistro de Confrarías de Pescadores de Galicia e as súas federacións.                                                                                                                                                                                                                 |
|      | Orde do 1 de setembro de 1998 pola que se establece a estrutura, regulamento de organización interna e funcionamento básico dos centros de investigacións mariñas dependente da Dirección Xeral de Formación Pesqueira e Investigación da Consellería de Pesca, Marisqueo e Acuicultura.                                              |
|      | Orde do 8 de setembro de 1998 pola que se regula o procedemento para a obtención dos títulos de competencia de mariñeiro, mariñeiro cociñeiro, radiotelefonista naval restrinxido, patrón local de pesca e patrón costeiro polivalente na Comunidade Autónoma de Galicia.                                                             |
|      | Decreto 294/1998, do 8 de outubro, polo que se modifica o Regulamento da actividade pesqueira e das artes e aparellos de pesca permisibles en Galicia, aprobado polo Decreto 424/1993, do 17 de decembro.                                                                                                                             |
| 1999 | Orde do 29 de marzo de 1999 pola que se crea o censo de profesionais autónomos prestadores de servizos á pesca.                                                                                                                                                                                                                       |



| Year | Regulation                                                                                                                                                                                                                                                                                                                                                                                                                            |
|------|---------------------------------------------------------------------------------------------------------------------------------------------------------------------------------------------------------------------------------------------------------------------------------------------------------------------------------------------------------------------------------------------------------------------------------------|
|      | Decreto 106/1999, do 23 de abril, polo que se modifica o Decreto 116/1995, do 31 de marzo, polo que se regula o control de biotoxinas en moluscos bivalvos e outros organismos procedentes da pesca, o marisqueo e a acuicultura.                                                                                                                                                                                                     |
|      | Decreto 211/1999, do 17 de xuño, polo que se regula a pesca marítima de recreo.                                                                                                                                                                                                                                                                                                                                                       |
|      | Orde do 13 de agosto de 1999 pola que se desenvolve o Decreto 211/1999, do 17 de xuño, polo que se regula a pesca marítima de recreo.                                                                                                                                                                                                                                                                                                 |
|      | Decreto 324/1999, do 16 de decembro, de asunción da ampliación de funcións e servizos da Administración do Estado, realizada polo Real decreto 1749/1999, do 19 de novembro, traspasados á Comunidade Autónoma de Galicia en materia de ensinanzas profesionais náutico-pesqueiras polos reais decretos 1283/1987, do 2 de outubro, e 1378/1997, do 29 de agosto, e a súa asignación á Consellería de Pesca, Marisqueo e Acuicultura. |
|      | Decreto 339/1999, do 16 de decembro, polo que se modifica o Regulamento da actividade pesqueira e das artes e aparellos de pesca permisibles en Galicia, aprobado polo Decreto 424/1993, do 17 de decembro.                                                                                                                                                                                                                           |
| 2000 | Orde do 20 de xaneiro de 2000 pola que se fixan as normas xerais de pesca nas augas continentais da Comunidade Autónoma de Galicia.                                                                                                                                                                                                                                                                                                   |
|      | Orde do 23 de febreiro de 2000 pola que se establece un plan de recuperación da sardiña ibero-atlántica durante os anos 2000, 2001 e 2002, e se regula a concesión de indemnizacións ós pescadores e propietarios de buques afectados.                                                                                                                                                                                                |
|      | Orde do 21 de marzo de 2000 pola que se modifica a dotación orzamentaria establecida na Orde do 29 de novembro de 1996, pola que se desenvolve o Decreto 155/1996, do 9 de maio, polo que se regulan os horarios do persoal adscrito ó Servizo de Protección de Recursos da Consellería de Pesca, Marisqueo e Acuicultura.                                                                                                            |
|      | Decreto 201/2000, do 6 de xullo, polo que se derroga o Decreto 278/1994, do 8 de setembro, polo que se establece o programa de axudas con finalidade estrutural no sector da pesca, a acuicultura e a transformación e comercialización dos seus produtos.                                                                                                                                                                            |
| 2001 | Decreto 71/2001, do 22 de marzo, polo que se aproba o Regulamento do persoal funcionario destinado nas confrarías de pescadores.                                                                                                                                                                                                                                                                                                      |
|      | Orde do 30 de novembro de 2001 pola que se regulan os procesos electorais nas confrarías de pescadores de Galicia.                                                                                                                                                                                                                                                                                                                    |

| Year | Regulation                                                                                                                                                                                                                           |
|------|--------------------------------------------------------------------------------------------------------------------------------------------------------------------------------------------------------------------------------------|
| 2002 | Decreto 125/2002, do 4 de abril, polo que se establece a estrutura orgánica da Consellería de Pesca e Asuntos Marítimos.                                                                                                             |
|      | Decreto 246/2002, do 18 de xullo, polo que se regula o Consello Galego de Pesca.                                                                                                                                                     |
|      | Decreto 261/2002, do 30 de xullo, polo que se aproban as normas reguladoras das confrarías de pescadores e as súas federacións.                                                                                                      |
|      | Decreto 348/2002, do 13 de decembro, polo que se modifica o Decreto 424/1993, do 17 de decembro, que aproba o Regulamento da actividade pesqueira e das artes e aparellos de pesca permisibles en Galicia.                           |
| 2003 | Orde do 4 de xuño de 2003 pola que se establecen as bases e condicións para a adopción de medidas complementarias na pesca costeira artesanal e se regula o procedemento de concesión de primas globais a tanto alzado.              |
|      | Decreto 382/2003, do 16 de outubro, polo que se modifica o Decreto 125/2002, do 4 de abril, polo que se establece a estrutura orgánica da Consellería de Pesca e Asuntos Marítimos.                                                  |
| 2004 | Decreto 24/2004, do 29 de xaneiro, polo que se crea o Comité Científico Galego da Pesca.                                                                                                                                             |
|      | Decreto 103/2004, do 13 de maio, polo que se regula o exercicio das competencias de pesca, marisqueo e acuicultura no Parque Nacional das Illas Atlánticas de Galicia.                                                               |
|      | Decreto 179/2004, do 7 de xullo, polo que se modifica o artigo 75 do Regulamento de ordenación da pesca fluvial e dos ecosistemas acuáticos continentais, aprobado polo Decreto 130/1997, do 14 de maio.                             |
|      | Decreto 197/2004, do 29 de xullo, polo que se regula a flota de pesca interior da Comunidade Autónoma de Galicia.                                                                                                                    |
|      | Orde do 4 de agosto de 2004 pola que se establece o sistema de transmisión de datos na fase de primeira venda da pesca fresca.                                                                                                       |
|      | Decreto 198/2004, do 29 de xullo, polo que se modifica o Decreto 424/1993, do 17 de decembro, que aproba o Regulamento da actividade pesqueira e das artes e aparellos de pesca permisibles en Galicia.                              |
| 2005 | Decreto 28/2005, do 28 de xaneiro, polo que se regula o control das biotoxinas en moluscos bivalvos e outros organismos procedentes da pesca, o marisqueo e a acuicultura.                                                           |
|      | Decreto 98/2005, do 14 de abril, polo que se modifica o Decreto 125/2002, do 4 de abril, modificado polo Decreto 382/2003, do 16 de outubro, polo que se establece a estrutura orgánica da Consellería de Pesca e Asuntos Marítimos. |

| Year | Regulation                                                                                                                                                                                                                                                                                                                                                                                                |
|------|-----------------------------------------------------------------------------------------------------------------------------------------------------------------------------------------------------------------------------------------------------------------------------------------------------------------------------------------------------------------------------------------------------------|
|      | Orde do 14 de xuño de 2005 pola que se regula a obtención e renovación das licenzas de pesca marítima de recreo en superficie clase A.                                                                                                                                                                                                                                                                    |
|      | Decreto 500/2005, do 15 de setembro, polo que se establece a estrutura orgánica da Consellería de Pesca e Asuntos Marítimos.                                                                                                                                                                                                                                                                              |
|      | Orde do 14 de decembro de 2005 pola que se modifica a do 4 de xuño de 2003 pola que se establecen as bases e condicións para a adopción de medidas complementarias na pesca costeira artesanal e se regula o procedemento de concesión de primas globais a tanto alzado.                                                                                                                                  |
| 2006 | Decreto 50/2006, do 23 de marzo, de modificación do Decreto 261/2002, do 30 de xullo, polo que se aproban as normas reguladoras das confrarías de pescadores e as súas federacións.                                                                                                                                                                                                                       |
| 2007 | <a href="#">Decreto 88/2007 do 19 de abril, polo que se regula o Catálogo galego de especies ameazadas.</a>                                                                                                                                                                                                                                                                                               |
| 2008 | Orde do 7 de febreiro de 2008 pola que se crea e regula o uso da marca «pescade- Rías, ¿de onde se non?».                                                                                                                                                                                                                                                                                                 |
|      | Orde do 7 de febreiro de 2008 pola que se establece o sistema de transmisión de datos na fase de primeira venda da pesca fresca.                                                                                                                                                                                                                                                                          |
|      | Orde do 26 de setembro de 2008 pola que se establecen as bases e se regula o procedemento para a obtención das titulacións de mariñeiro pescador, patrón local de pesca e patrón costeiro polivalente na Comunidade Autónoma de Galicia.                                                                                                                                                                  |
|      | Orde do 20 de outubro de 2008 pola que se establecen as bases e se regula o procedemento de concesión de axudas para a realización de proxectos piloto dirixidos á adquisición e difusión de novos coñecementos técnicos levados a cabo por unha entidade en cooperación cun organismo científico ou técnico (con financiamento do Fondo Europeo da Pesca).                                               |
|      | Orde do 20 de outubro de 2008 pola que se establecen as bases e se regula o procedemento de concesión de axudas a organismos públicos ou semipúblicos para a realización de proxectos de transformación de buques pesqueiros para a súa reconversión, con fins de formación ou de investigación no sector pesqueiro ou para actividades distintas da pesca (con financiamento do Fondo Europeo da Pesca). |
|      | Lei 11/2008, do 3 de decembro, de pesca de Galicia.                                                                                                                                                                                                                                                                                                                                                       |

| Year | Regulation                                                                                                                                                                                                                                                       |
|------|------------------------------------------------------------------------------------------------------------------------------------------------------------------------------------------------------------------------------------------------------------------|
| 2009 | Lei 1/2009, do 15 de xuño, de modificación da Lei 11/2008, do 3 de decembro, de pesca de Galicia.                                                                                                                                                                |
|      | Orde do 17 de setembro de 2009 pola que se desenvolve o Decreto 211/1999, do 17 de xuño, polo que se regula a pesca marítima de recreo.                                                                                                                          |
|      | Lei 6/2009, do 11 de decembro, de modificación da Lei 11/2008, do 3 de decembro, de pesca de Galicia.                                                                                                                                                            |
| 2010 |                                                                                                                                                                                                                                                                  |
| 2011 | Decreto 72/2011, do 31 de marzo, polo que se regula o Comité Científico Galego de Pesca.                                                                                                                                                                         |
|      | Orde do 16 de xuño de 2011 pola que se establecen as bases reguladoras das axudas para o fomento da contratación dun seguro no exercicio das actividades de pesca, marisqueo e acuicultura e se procede á súa convocatoria para o ano 2011.                      |
|      | Decreto 123/2011, do 16 de xuño, polo que se regula o Consello Galego de Pesca.                                                                                                                                                                                  |
|      | <a href="#">DECRETO 167/2011, do 4 de agosto</a>                                                                                                                                                                                                                 |
|      | Decreto 130/2011, do 9 de xuño, polo que se regula a pesca profesional da anguía nas augas continentais competencia da Comunidade Autónoma de Galicia.                                                                                                           |
| 2012 |                                                                                                                                                                                                                                                                  |
| 2013 | Orde do 24 de xaneiro de 2013 pola que se modifica a Orde do 14 de novembro de 1995 pola que se regula o programa de actuacións para o control de biotoxinas mariñas en moluscos bivalvos e outros organismos procedentes da pesca, o marisqueo e a acuicultura. |
|      | Decreto 94/2013, do 6 de xuño, polo que se establece o currículo do ciclo formativo de grao superior correspondente ao título de técnico superior en Transporte Marítimo e Pesca de Altura.                                                                      |
|      | Decreto 114/2013, do 18 de xullo, polo que se modifica o Decreto 119/1994, do 28 de abril, polo que se fixan os prezos públicos dos servizos xestionados pola Consellería de Agricultura, Gandaría e Montes referentes a actividades de caza e pesca.            |

| Year | Regulation                                                                                                                                                                                                                                                        |
|------|-------------------------------------------------------------------------------------------------------------------------------------------------------------------------------------------------------------------------------------------------------------------|
|      | Decreto 171/2013, do 28 de novembro, polo que se modifica o Decreto 119/1994, do 28 de abril, polo que se fixan os prezos públicos dos servizos xestionados pola Consellería de Agricultura, Gandaría e Montes referentes a actividades de caza e pesca.          |
|      | Decreto 194/2013, do 27 de decembro, polo que se establece o currículo do ciclo formativo de grao medio correspondente ao título de técnico en Navegación e Pesca de Litoral.                                                                                     |
| 2014 | Decreto 8/2014, do 16 de xaneiro, polo que se regulan as confrarías de pescadores de Galicia e as súas federacións.                                                                                                                                               |
|      | Orde do 29 de abril de 2014 pola que se regulan as eleccións para a renovación dos órganos reitores de confrarías de pescadores de Galicia e das súas federacións.                                                                                                |
|      | <a href="#"><u>Orden AAA/1260/2014, de 9 de julio, por la que se declaran Zonas de Especial Protección para las Aves en aguas marinas españolas.</u></a>                                                                                                          |
|      | Orde do 31 de xullo de 2014 pola que se establecen as bases e se regula o procedemento para a obtención das titulacións de mariñeiro/a pescador/a, patrón/ patroa local de pesca e patrón/patroa costeiro/a polivalente na Comunidade Autónoma de Galicia.        |
| 2015 | Orde do 9 de outubro de 2015 pola que se determina a adscrición dos órganos da extinta Secretaría Xeral do Mar á Dirección Xeral de Pesca, Acuicultura e Innovación Tecnolóxica.                                                                                  |
|      | Orde do 29 de decembro de 2015 pola que se modifica a Orde do 14 de novembro de 1995 pola que se regula o programa de actuacións para o control de biotoxinas mariñas en moluscos bivalvos e outros organismos procedentes da pesca, o marisqueo e a acuicultura. |
| 2016 |                                                                                                                                                                                                                                                                   |
| 2017 |                                                                                                                                                                                                                                                                   |
| 2018 | Decreto 64/2018, do 7 de xuño, polo que se modifica o Decreto 8/2014, do 16 de xaneiro, polo que se regulan as confrarías de pescadores de Galicia e as súas federacións.                                                                                         |
| 2019 | Ley 5/2019, de 2 de agosto, del patrimonio natural y de la biodiversidad de Galicia                                                                                                                                                                               |

| Year | Regulation                                                                                                                                                             |
|------|------------------------------------------------------------------------------------------------------------------------------------------------------------------------|
|      | <a href="#"><u>DECRETO 153/2019, de 21 de noviembre, por el que se regula el régimen de conservación y explotación de los recursos marisqueros y de las algas.</u></a> |

**Tabla S2.9.** Summary of the Fisheries Regulations at Regional level: Asturias

| Year | Regulation                                                                                                                                                                                                                       |
|------|----------------------------------------------------------------------------------------------------------------------------------------------------------------------------------------------------------------------------------|
| 1985 | DECLARACIÓN de zona de interés de cultivos marinos de la ensenada de La Linera por el Consejo de Gobierno del Principado de Asturias en sesión del 7 de los corrientes. Oviedo, 12 de febrero de 1985. (BOPA de 21-02-1985).     |
| 1986 | RESOLUCIÓN de 23 de octubre de 1986 , de la Consejería de Agricultura y Pesca, por la que se regula el movimiento de cetáceas. (BOPAP 3-11-1986).                                                                                |
|      | RESOLUCIÓN de 27 de noviembre de 1986 , de la Consejería de Agricultura y Pesca, por la que se establece veda indefinida de marisqueo en la bahía de Luanco. (BOPAP 5-12-1986).                                                  |
| 1987 |                                                                                                                                                                                                                                  |
| 1988 | DECRETO 82/88, de 7 de julio , por el que se regula la recogida, extracción y circulación de algas en el Principado de Asturias. (BOPA 20-7-1988).                                                                               |
| 1989 |                                                                                                                                                                                                                                  |
| 1990 | RESOLUCIÓN de 24 de abril de 1990 , de la Consejería de Agricultura y Pesca, por la que se establece veda permanente para artes de enmalle en la desembocadura de los ríos. (BOPAP 13-6-1990 / corrección de errores 30-6-1990). |
|      | Decreto 32/90, de 8 de marzo, creacion Catálogo Regional de Especies Amenazadas de la Fauna Vertebrada del Principado de Asturias y se dictan normas para su proteccion                                                          |
| 1991 |                                                                                                                                                                                                                                  |
| 1992 |                                                                                                                                                                                                                                  |
| 1993 | LEY 2/93 , modificada por la Ley del Principado de Asturias 15/2002, de 27 de diciembre de Pesca Marítima en Aguas Interiores y Aprovechamiento de Recursos Marinos (BOPA 31-diciembre-2002).                                    |
| 1994 | <a href="#">Decreto 38/1994, se aprueba el Plan de Ordenación de los Recursos Naturales del Principado de Asturias.</a>                                                                                                          |
| 1995 | DECRETO 22/95, de 2 de marzo , por el que se establece el procedimiento para la subasta pública de bienes decomisados por infracciones a la legislación pesquera. (BOPA 3-4-1995).                                               |

| Year        | Regulation                                                                                                                                                                                                                                                                    |
|-------------|-------------------------------------------------------------------------------------------------------------------------------------------------------------------------------------------------------------------------------------------------------------------------------|
|             | DECRETO 23/95, de 2 de marzo de 1995 , por el que se crea la figura de guardapesca marítimo autorizado. (BOPA 4-4-1995).                                                                                                                                                      |
|             | DECRETO 65/95, de 27 de abril, Catálogo Regional de Especies Amenazadas de la Flora del Principado de Asturias y se dictan normas para su protección.                                                                                                                         |
|             | RESOLUCIÓN de la Consejería de Medio Rural y Pesca por la que se establecen normas para la identificación de los Vigilantes de Aguas Interiores. (BOPA 25-4-1995).                                                                                                            |
| <b>1996</b> |                                                                                                                                                                                                                                                                               |
| <b>1997</b> | RESOLUCIÓN de 13 de marzo de 1997 , de la Consejería de Agricultura, por la que se regulan las tallas, pesos mínimos de captura y épocas de veda. (BOPA 7-4-1997). Modificada:<br>Rectificación de Errores Resolución de 2 de mayo de 1997. /Resolución de 5 de mayo de 1997. |
|             | RESOLUCIÓN de 2 de mayo de 1997 , de la Consejería de Agricultura, por la que se rectifica error en la resolución de fecha 13 de marzo de 1997, por la que se regulan las tallas, pesos mínimos de captura y épocas de veda. (BOPA 21-5-1997).                                |
|             | RESOLUCIÓN de 5 de mayo de 1997 , de la Consejería de Agricultura, por la que se modifica parcialmente la resolución de 13 de marzo de 1997, por la que se regulan las tallas, pesos mínimos de captura y épocas de veda. (BOPA 21-5-1997).                                   |
| <b>1998</b> | DECRETO 35/1998, de 18 de junio , por el que se regula la actividad de marisqueo a pie en aguas competencia del Principado de Asturias. (BOPA 4-7-98).                                                                                                                        |
|             | DECRETO 79/1998, de 17 de diciembre , por el que se regula la extracción de gusanos marinos para cebo en el Principado de Asturias. (BOPA 13-01-1999).                                                                                                                        |
|             | RESOLUCION de 18 de junio de 1998 , de la Consejería de Agricultura, por la que se crea el Censo oficial de la flota pesquera del Principado de Asturias. (BOPA 11-7-1998).                                                                                                   |
| <b>1999</b> | RESOLUCIÓN de 7 de abril de 1999 , de la Consejería de Agricultura, por la que se declara el litoral asturiano zona de producción para la captura del erizo de mar violáceo y moluscos gasterópodos (AST1-03). (BOPA 224-99).                                                 |



| Year | Regulation                                                                                                                                                                                                                                                                                                                                                                        |
|------|-----------------------------------------------------------------------------------------------------------------------------------------------------------------------------------------------------------------------------------------------------------------------------------------------------------------------------------------------------------------------------------|
| 2000 | RESOLUCIÓN de 2 de mayo de 2000 , de la Consejería de Medio Rural y Pesca, por la que se regula el hundimiento de cascós de madera para la formación de biotopos. (BOPA 15-5-00).                                                                                                                                                                                                 |
| 2001 |                                                                                                                                                                                                                                                                                                                                                                                   |
| 2002 | RESOLUCIÓN de 25 de enero de 2002 , de la Consejería de Medio Rural y Pesca, por la que se regula la pesca con arte de cerco en aguas interiores del Principado de Asturias. (BOPA 5-2-2002).                                                                                                                                                                                     |
| 2003 |                                                                                                                                                                                                                                                                                                                                                                                   |
| 2004 | RESOLUCIÓN de 10 de marzo de 2004 , de la Consejería de Medio Rural y Pesca, por la que se aprueba el Plan de Explotación del Marisqueo.                                                                                                                                                                                                                                          |
|      | RESOLUCIÓN de 2 de julio de 2004 , de la Consejería de Medio Rural y Pesca, por la que se establecen limitaciones al ejercicio de la actividad pesquera y de marisqueo en el tramo bajo del río Sella (BOPA 12-7-2004).                                                                                                                                                           |
|      | RESOLUCIÓN de 6 de septiembre de 2004 , de la Consejería de Medio Rural y Pesca, por la que se regula el descanso semanal obligatorio para la pesca profesional en el Principado de Asturias. (BOPA 25-9-2004).                                                                                                                                                                   |
| 2005 |                                                                                                                                                                                                                                                                                                                                                                                   |
| 2006 | DECRETO 25/2006, de 15 de marzo , por el que se regula la pesca marítima de recreo en el Principado de Asturias.                                                                                                                                                                                                                                                                  |
| 2007 |                                                                                                                                                                                                                                                                                                                                                                                   |
| 2008 |                                                                                                                                                                                                                                                                                                                                                                                   |
| 2009 | GRUPOS DE ACCIÓN COSTERA Resolución de 30 de diciembre de 2009, de la Consejería de Medio Rural y Pesca, por la que se hace pública la convocatoria para la selección de Grupos de Acción Costera, en el marco del Fondo Europeo de la Pesca 2007-2013.                                                                                                                           |
| 2010 |                                                                                                                                                                                                                                                                                                                                                                                   |
| 2011 | Segunda modificación Resolución 25-01-2002 pesca Cerco Aguas Interiores Resolución de 24 de noviembre de 2011, de la Consejería de Agroganadería y Recursos Autóctonos, de segunda modificación de la Resolución de 25 de enero de 2002, de la Consejería de Medio Rural y Pesca, por la que se regula la pesca con arte de cerco en aguas interiores del Principado de Asturias. |

| Year        | Regulation                                                                                                                                                                                                                                                                                                                                                                                                                                        |
|-------------|---------------------------------------------------------------------------------------------------------------------------------------------------------------------------------------------------------------------------------------------------------------------------------------------------------------------------------------------------------------------------------------------------------------------------------------------------|
|             | Modificación Bases ayudas Cofradías de Pescadores Resolución de 28 de febrero de 2011, de la Consejería de Medio Rural y Pesca, por la que se modifican las bases reguladoras de las subvenciones destinadas a las Cofradías de Pescadores y entidades sin ánimo de lucro representativas del sector pesquero del Principado de Asturias, recogidas en la Resolución de 5 de mayo de 2008, de la Consejería de Medio Ambiente y Desarrollo Rural. |
|             | Plan Recuperación Merluza Resolución de 27 de junio de 2011, de la Consejería de Medio Rural y Pesca, por la que se aprueban las bases reguladoras y la convocatoria para la concesión de las ayudas públicas a los tripulantes de buques asturianos afectados por el Plan de Recuperación de la Merluza del Sur y Cigala, por la paralización temporal de su actividad durante el ejercicio 2008-2009.                                           |
| <b>2012</b> |                                                                                                                                                                                                                                                                                                                                                                                                                                                   |
| <b>2013</b> | Veda extracción de oricio Resolución de 10 de abril de 2013, de la Consejería de Agroganadería y Recursos Autóctonos, por la que se establece un período de veda para la extracción del oricio ( <i>Paracentrotus lividus</i> ).                                                                                                                                                                                                                  |
| <b>2014</b> |                                                                                                                                                                                                                                                                                                                                                                                                                                                   |
| <b>2015</b> | EXTRACCIÓN PERCEBE PUERTO DE EL MUSEL Resolución de 14 de septiembre de 2015, de la Consejería de Desarrollo Rural y Recursos Naturales, por la que se establecen normas específicas para la extracción del percebe en espacios portuarios del puerto de El Musel (Gijón).                                                                                                                                                                        |
| <b>2016</b> | Extracción de anénoma de mar y oricios Resolución de 5 de septiembre de 2016, de la Consejería de Desarrollo Rural y Recursos Naturales, por la que se establecen medidas en relación con la extracción de la anémona de mar u ortiguilla ( <i>Anemonia viridis</i> ) y el oricio ( <i>Paracentrotus lividus</i> ).                                                                                                                               |
|             | Bases reguladoras adaptación flota pesquera Resolución de 12 de septiembre de 2016, de la Consejería de Desarrollo Rural y Recursos Naturales, por la que se aprueban las bases reguladoras de las ayudas públicas al sector pesquero del Principado de Asturias dirigidas a la adaptación de la flota pesquera.                                                                                                                                  |
| <b>2017</b> | Campaña angula 2017/2018. Plan gestión ría Nalón Resolución de 20 de octubre de 2017, de la Consejería de Desarrollo Rural y Recursos Naturales, por la que se regula la campaña 2017/2018 de pesca de la angula y se aprueba el plan de gestión en la ría del Nalón.                                                                                                                                                                             |

| Year        | Regulation                                                                                                                                                                                                                                                                |
|-------------|---------------------------------------------------------------------------------------------------------------------------------------------------------------------------------------------------------------------------------------------------------------------------|
|             | Plan de gestión de angula en la ría de Tinamayor Resolución de 20 de octubre de 2017, de la Consejería de Desarrollo Rural y Recursos Naturales, por la que se regula el plan para la gestión de la pesca de la angula en la ría de Tinamayor                             |
|             | Campaña extracción percebe 2017/2018 Resolución de 14 de septiembre de 2017, de la Consejería de Desarrollo Rural y Recursos Naturales, por la que se regula la campaña 2017/2018 de extracción del percebe y se aprueba los planes de explotación.                       |
| <b>2018</b> | Campaña extracción de algas 2018. Sectores I, II y III Resolución de 13 de junio de 2018, de la Consejería de Desarrollo Rural y Recursos Naturales, por la que se autoriza la extracción de algas de fondo del género Gelidium ("ocle") en los sectores I, II y III.     |
|             | Plan de Explotación del Percebe de San Juan de La Arena y Avilés Resolución de 8 de noviembre de 2018, de la Consejería de Desarrollo Rural y Recursos Naturales, por la que se crea el Plan de Explotación del Percebe de San Juan de La Arena y Avilés.                 |
|             | Campaña extracción de algas 2018. Sector IV Resolución de 13 de junio de 2018, de la Consejería de Desarrollo Rural y Recursos Naturales, por la que se autoriza, con carácter experimental, la extracción de algas de fondo del género Gelidium ("ocle") en el sector IV |
| <b>2019</b> |                                                                                                                                                                                                                                                                           |

**File S3:** Summary of the Natura 2000 Network marine protected in each study area.  
Contains four Tables:

**Table S3.1.** Summary of the Marine Protected Areas (MPAs) of the marine areas of the Gulf of Cádiz.

**Table S3.2.** Summary of the Marine Protected Areas (MPAs) of the marine areas of the Alborán Sea

**Table S3.3.** Summary of the Marine Protected Areas (MPAs) of the marine areas of the Asturias.

**Table S3.4.** Summary of the Marine Protected Areas (MPAs) of the marine areas of the Galicia.

**Table S3.1.** Summary of the Marine Protected Areas (MPAs) of the marine areas of the Gulf of Cádiz.

| Marine Protected Area                        | Figure                                            | Year of creation | Governance          | Level of protection | Marine area   |
|----------------------------------------------|---------------------------------------------------|------------------|---------------------|---------------------|---------------|
| Doñana                                       | SCI <sup>a</sup>                                  | 1987             | Spanish government  | RN2000-EU           | Gulf of Cádiz |
| Doñana                                       | RAMSAR                                            | 1982             | Spanish government  | International       | Gulf of Cádiz |
| Doñana                                       | Biosphere Reserve                                 | 1980             | Spanish government  | International       | Gulf of Cádiz |
| Doñana                                       | SPA <sup>b</sup>                                  | 1987             | Spanish government  | RN2000-EU           | Gulf of Cádiz |
| Marismas de Isla Cristina                    | Paraje Natural                                    | 1989             | Regional government | Andalucía           | Gulf of Cádiz |
| Marismas de Isla Cristina                    | SCI <sup>a</sup>                                  | 2006             | Spanish government  | RN2000-EU           | Gulf of Cádiz |
| Marismas de Isla Cristina                    | SPA <sup>b</sup>                                  | 2002             | Spanish government  | RN2000-EU           | Gulf of Cádiz |
| Fondos Marinos Río Palmones                  | SCI <sup>a</sup>                                  | 2006             | Spanish government  | RN2000-EU           | Gulf of Cádiz |
| Fondos Marinos Río Palmones                  | Paraje Natural                                    | 1989             | Regional government | Andalucía           | Gulf of Cádiz |
| Fondos Marinos Río Palmones                  | SAC <sup>c</sup>                                  | 2002             | Spanish government  | RN2000-EU           | Gulf of Cádiz |
| Fondos Marinos Río Palmones                  | SPA <sup>b</sup>                                  | 2013             | Spanish government  | RN2000-EU           | Gulf of Cádiz |
| Fondos Marinos Bahía de Cádiz                | SCI <sup>a</sup>                                  | 2006             | Spanish government  | RN2000-EU           | Gulf of Cádiz |
| Fondos Marinos Bahía de Cádiz                | SAC <sup>c</sup>                                  | 2012             | Spanish government  | RN2000-EU           | Gulf of Cádiz |
| Bahía de Cádiz                               | Parque Natural                                    | 1989             | Regional government | Andalucía           | Gulf of Cádiz |
| Frente litoral Estrecho                      | SCI <sup>a</sup>                                  | 1989             | Spanish government  | RN2000-EU           | Gulf of Cádiz |
| Frente litoral Estrecho                      | SPA <sup>b</sup>                                  | 2003             | Spanish government  | RN2000-EU           | Gulf of Cádiz |
| Estrecho                                     | Biosphere Reserve                                 | 2006             | Spanish government  | International       | Gulf of Cádiz |
| Estrecho                                     | Parque Natural                                    | 2003             | Regional government | Andalucía           | Gulf of Cádiz |
| Estrecho                                     | SAC <sup>c</sup>                                  | 2012             | Spanish government  | RN2000-EU           | Gulf of Cádiz |
| La Breña y Marismas de Barbate               | SCI <sup>a</sup>                                  | 1997             | Spanish government  | RN2000-EU           | Gulf of Cádiz |
| La Breña y Marismas de Barbate               | Parque Natural                                    | 1989             | Regional government | Andalucía           | Gulf of Cádiz |
| La Breña y Marismas de Barbate               | SAC <sup>c</sup>                                  | 2012             | Spanish government  | RN2000-EU           | Gulf of Cádiz |
| La Breña y Marismas de Barbate               | SPA <sup>b</sup>                                  | 2002             | Spanish government  | RN2000-EU           | Gulf of Cádiz |
| Punta Trafalgar                              | SCI <sup>a</sup>                                  | 1999             | Spanish government  | RN2000-EU           | Gulf of Cádiz |
| Reserva de Pesca Desembocadura Guadalquivir  | Marine reserve for fishing                        | 2004             | Regional government | Andalucía           | Gulf of Cádiz |
| Reserva Intercontinental Andalucía-Marruecos | Intercontinental Marine Reserve Andalucía-Marocco | 2006             | Spanish government  | International       | Gulf of Cádiz |

<sup>a</sup>Sites of Community Importance (SCI), <sup>b</sup>Special Protection Areas (SPA), <sup>c</sup>Special Areas of Conservation (SAC)

**Table S3.2.** Summary of the Marine Protected Areas (MPAs) of the marine areas of the Alborán Sea.

| Marine Protected Area                      | Figure                     | Year of creation | Governance          | Level of protection | Marine area |
|--------------------------------------------|----------------------------|------------------|---------------------|---------------------|-------------|
| Acantilados Maro-Cerro Gordo               | Paraje Natural             | 1989             | Regional government | Andalucía           | Alborán sea |
| Acantilados Maro-Cerro Gordo               | SAC <sup>c</sup>           | 2014             | Spanish government  | RN2000-EU           | Alborán sea |
| Acantilados Maro-Cerro Gordo               | SCI <sup>a</sup>           | 2006             | Spanish government  | RN2000-EU           | Alborán sea |
| Acantilados Maro-Cerro Gordo               | SPA <sup>b</sup>           | 2010             | Spanish government  | RN2000-EU           | Alborán sea |
| Acantilados Maro-Cerro Gordo               | ZEPIM <sup>d</sup>         | 2003             | Spanish government  | RN2000-EU           | Alborán sea |
| Bahía de Almería                           | SPA <sup>b</sup>           | 2014             | Spanish government  | RN2000-EU           | Alborán sea |
| Cabo de Gata-Níjar                         | Biosphere Reserve          | 1997             | Spanish government  | International       | Alborán sea |
| Cabo de Gata-Níjar                         | Marine Reserve             | 1995             | Spanish government  | National            | Alborán sea |
| Cabo de Gata-Níjar                         | Parque Natural             | 1988             | Regional government | Andalucía           | Alborán sea |
| Cabo de Gata-Níjar                         | SAC <sup>c</sup>           | 2012             | Spanish government  | RN2000-EU           | Alborán sea |
| Cabo de Gata-Níjar                         | SCI <sup>a</sup>           | 2006             | Spanish government  | RN2000-EU           | Alborán sea |
| Cabo de Gata-Níjar                         | SPA <sup>b</sup>           | 1989             | Spanish government  | RN2000-EU           | Alborán sea |
| Cabo de Gata-Níjar                         | ZEPIM <sup>d</sup>         | 2001             | Spanish government  | International       | Alborán sea |
| El Saladillo-Punta de Baños                | SCI <sup>a</sup>           | 2012             | Spanish government  | International       | Alborán sea |
| Espacio Marino de Alborán                  | SCI <sup>a</sup>           | 2014             | Spanish government  | International       | Alborán sea |
| Estrecho Oriental                          | SCI <sup>a</sup>           | 2009             | Spanish government  | International       | Alborán sea |
| Estrecho Oriental                          | SAC <sup>c</sup>           | 2012             | Spanish government  | International       | Alborán sea |
| Fondos Marinos Calahonda-Castells de Ferro | SCI <sup>a</sup>           | 2006             | Spanish government  | International       | Alborán sea |
| Fondos Marinos Guadiaro                    | SCI <sup>a</sup>           | 2006             | Spanish government  | International       | Alborán sea |
| Fondos Marinos Levante almeriense          | SCI <sup>a</sup>           | 2006             | Spanish government  | International       | Alborán sea |
| Fondos Marinos Punta de la Mona            | SAC <sup>c</sup>           | 2014             | Spanish government  | International       | Alborán sea |
| Fondos Marinos Punta de la Mona            | SCI <sup>a</sup>           | 2006             | Spanish government  | International       | Alborán sea |
| Fondos Marinos Punta Entinas-Sabinar       | SCI <sup>a</sup>           | 2006             | Spanish government  | International       | Alborán sea |
| Fondos Marinos Punta Entinas-Sabinar       | SPA <sup>b</sup>           | 2003             | Spanish government  | International       | Alborán sea |
| Fondos Marinos Tesorillo-Salobreña         | SAC <sup>c</sup>           | 2014             | Spanish government  | International       | Alborán sea |
| Fondos Marinos Tesorillo-Salobreña         | SCI <sup>a</sup>           | 2006             | Spanish government  | International       | Alborán sea |
| Isla Alborán                               | Marine Reserve             | 1997             | Spanish government  | National            | Alborán sea |
| Isla Alborán                               | Marine Reserve for fishing | 1997             | Spanish government  | National            | Alborán sea |
| Isla Alborán                               | Paraje Natural             | 2003             | Regional government | Andalucía           | Alborán sea |
| Isla Alborán                               | SAC <sup>c</sup>           | 2015             | Spanish government  | RN2000-EU           | Alborán sea |
| Isla Alborán                               | SCI <sup>a</sup>           | 2006             | Spanish government  | RN2000-EU           | Alborán sea |
| Isla Alborán                               | SPA <sup>b</sup>           | 2001             | Spanish government  | RN2000-EU           | Alborán sea |
| Isla Alborán y Fondos Marinos              | ZEPIM <sup>d</sup>         | 2001             | Spanish government  | RN2000-EU           | Alborán sea |
| Salinas Cabo de Gata                       | RAMSAR                     | 2006             | Spanish government  | RN2000-EU           | Alborán sea |

<sup>a</sup>Sites of Community Importance (SCI), <sup>b</sup>Special Protection Areas (SPA), <sup>c</sup>Special Areas of Conservation (SAC); <sup>d</sup> Specially protected area of importance for the Mediterranean (ZEPIM)

**Table S3.3.** Summary of the Marine Protected Areas (MPAs) of the marine areas of the Asturias.

| Marine Protected Area                   | Figure | Year of creation | Governance         | Level of protection | Marine area              |
|-----------------------------------------|--------|------------------|--------------------|---------------------|--------------------------|
| Espacio marino de Cabo Peñas            | SPA    | 2014             | Spanish government | RN2000-UE           | Demarcación Noratlántica |
| Sistema de cañones submarinos de Avilés | SCI    | 2014             | Spanish government | RN2000-UE           | Demarcación Noratlántica |

**Table S3.4.** Summary of the Marine Protected Areas (MPAs) of the marine areas of the Galicia.

| Marine Protected Area                                                   | Figure | Year of creation | Governance         | Level of protection | Marine area              |
|-------------------------------------------------------------------------|--------|------------------|--------------------|---------------------|--------------------------|
| Banco de Galicia                                                        | SCI    | 2014             | Spanish government | RN2000-UE           | Demarcación Noratlántica |
| ZEPA Banco de Galicia                                                   | SPA    | 2014             | Spanish government | RN2000-UE           | Demarcación Noratlántica |
| Espacio marino de la Costa da Morte                                     | SPA    | 2014             | Spanish government | RN2000-UE           | Demarcación Noratlántica |
| Espacio marino de la Costa de Ferrolterra-Valdoviño                     | SPA    | 2014             | Spanish government | RN2000-UE           | Demarcación Noratlántica |
| Espacio marino de las Rías Baixas de Galicia                            | SPA    | 2014             | Spanish government | RN2000-UE           | Demarcación Noratlántica |
| Espacio marino de Punta de Candelaria-Ría de Ortigueira-Estaca de Bares | SPA    | 2014             | Spanish government | RN2000-UE           | Demarcación Noratlántica |

**File S4:** Summary of Pearson correlation analysis results showing the relationships between the integrated indices for the studied marine areas. Contains two Tables:

**Table S4.1.** Pearson correlation analysis showing the relationships between the integrated indices for the marine areas of the Gulf of Cádiz (GC) and the Alborán Sea (A). The significance level at 95% confidence is shown in bold.

**Table S4.2.** Pearson correlation analysis showing the relationships between the integrated indices for the marine areas of the Galicia (G) and Asturias (As). The significance level at 95% confidence is shown in bold.



**Table S4.1.** Pearson correlation analysis showing the relationships between the integrated indices for the marine areas of the Gulf of Cádiz (GC) and the Alborán Sea (A). The significance level at 95% confidence is shown in bold.

| Integrated indices       | Demographic   |               | Economical    |              | Cultural     |               | Overexploitation |               | Land use change |               | Exploited biodiversity |               | Jeopardized biodiversity |               | Provisioning ES |               | Cultural ES  |        | Regulating ES |        | Management Responses |              |
|--------------------------|---------------|---------------|---------------|--------------|--------------|---------------|------------------|---------------|-----------------|---------------|------------------------|---------------|--------------------------|---------------|-----------------|---------------|--------------|--------|---------------|--------|----------------------|--------------|
|                          | GC            | A             | GC            | A            | GC           | A             | GC               | A             | GC              | A             | GC                     | A             | GC                       | A             | GC              | A             | GC           | A      | GC            | A      | GC                   | A            |
| Economical               | <b>0.639</b>  | 0.168         |               |              |              |               |                  |               |                 |               |                        |               |                          |               |                 |               |              |        |               |        |                      |              |
| Cultural                 | <b>0.369</b>  | 0.318         | <b>0.519</b>  | <b>0.451</b> |              |               |                  |               |                 |               |                        |               |                          |               |                 |               |              |        |               |        |                      |              |
| Overexploitation         | <b>-0.658</b> | <b>-0.489</b> | <b>-0.334</b> | 0.207        | -0.135       | -0.076        |                  |               |                 |               |                        |               |                          |               |                 |               |              |        |               |        |                      |              |
| Land use change          | <b>0.915</b>  | <b>0.926</b>  | <b>0.474</b>  | 0.048        | 0.303        | 0.215         | <b>-0.524</b>    | <b>-0.348</b> |                 |               |                        |               |                          |               |                 |               |              |        |               |        |                      |              |
| Exploited biodiversity   | <b>-0.886</b> | <b>-0.89</b>  | <b>-0.521</b> | -0.21        | -0.323       | <b>-0.335</b> | <b>0.75</b>      | <b>0.456</b>  | <b>-0.818</b>   | <b>-0.795</b> |                        |               |                          |               |                 |               |              |        |               |        |                      |              |
| Jeopardized biodiversity | <b>-0.921</b> | <b>-0.962</b> | <b>-0.54</b>  | -0.174       | -0.317       | -0.331        | <b>0.777</b>     | <b>0.595</b>  | <b>-0.867</b>   | <b>-0.844</b> | <b>0.941</b>           | <b>0.927</b>  |                          |               |                 |               |              |        |               |        |                      |              |
| Provisioning ES          | <b>-0.745</b> | <b>-0.862</b> | -0.321        | 0.061        | -0.226       | -0.173        | <b>0.499</b>     | 0.269         | <b>-0.711</b>   | <b>-0.926</b> | <b>0.722</b>           | <b>0.753</b>  | <b>0.735</b>             | <b>0.792</b>  |                 |               |              |        |               |        |                      |              |
| Cultural ES              | <b>0.723</b>  | -0.042        | <b>0.469</b>  | 0.113        | 0.219        | 0.002         | -0.293           | <b>0.715</b>  | <b>0.709</b>    | 0.192         | <b>-0.528</b>          | -0.019        | <b>-0.493</b>            | 0.169         | <b>-0.515</b>   | -0.211        |              |        |               |        |                      |              |
| Regulating ES            | -0.201        | -0.138        | 0.231         | -0.28        | 0.005        | 0.128         | -0.116           | -0.346        | <b>-0.384</b>   | -0.218        | 0.195                  | -0.047        | 0.249                    | 0.023         | <b>0.534</b>    | 0.248         | -0.075       | -0.272 |               |        |                      |              |
| Management Responses     | <b>0.819</b>  | <b>0.814</b>  | <b>0.474</b>  | -0.091       | 0.129        | 0.042         | <b>-0.822</b>    | <b>-0.661</b> | <b>0.728</b>    | <b>0.79</b>   | <b>-0.768</b>          | <b>-0.646</b> | <b>-0.808</b>            | <b>-0.774</b> | <b>-0.545</b>   | <b>-0.718</b> | <b>0.624</b> | -0.292 | 0.058         | -0.132 |                      |              |
| Conservation Responses   | <b>0.979</b>  | <b>0.978</b>  | <b>0.648</b>  | 0.107        | <b>0.349</b> | 0.224         | <b>-0.741</b>    | -0.455        | <b>0.868</b>    | <b>0.961</b>  | <b>-0.902</b>          | <b>-0.865</b> | <b>-0.947</b>            | <b>-0.929</b> | <b>-0.745</b>   | <b>-0.907</b> | <b>0.661</b> | 0.016  | -0.158        | -0.171 | <b>0.851</b>         | <b>0.849</b> |

**Table S4.2.** Pearson correlation analysis showing the relationships between the integrated indices for the marine areas of the Galicia (G) and Asturias (As). The significance level at 95% confidence is shown in bold.

| Integrated indices       | Demographic   |               | Economical    |               | Cultural      |               | Overexploitation |               | Land use change |               | Exploited biodiversity |               | Jeopardized biodiversity |               | Provisioning ES |        | Cultural ES |              | Regulating ES |              | Management Responses |              |
|--------------------------|---------------|---------------|---------------|---------------|---------------|---------------|------------------|---------------|-----------------|---------------|------------------------|---------------|--------------------------|---------------|-----------------|--------|-------------|--------------|---------------|--------------|----------------------|--------------|
|                          | G             | As            | G             | As            | G             | As            | G                | As            | G               | As            | G                      | As            | G                        | As            | G               | As     | G           | As           | G             | As           | G                    | As           |
| Economical               | <b>0.412</b>  | <b>-0.468</b> |               |               |               |               |                  |               |                 |               |                        |               |                          |               |                 |        |             |              |               |              |                      |              |
| Cultural                 | -0.301        | <b>-0.713</b> | 0.114         | <b>0.732</b>  |               |               |                  |               |                 |               |                        |               |                          |               |                 |        |             |              |               |              |                      |              |
| Overexploitation         | -0.213        | <b>0.413</b>  | <b>-0.480</b> | <b>-0.797</b> | <b>-0.571</b> | <b>-0.809</b> |                  |               |                 |               |                        |               |                          |               |                 |        |             |              |               |              |                      |              |
| Land use change          | -0.085        | -0.114        | <b>0.604</b>  | 0.192         | 0.320         | <b>0.348</b>  | <b>-0.687</b>    | <b>-0.506</b> |                 |               |                        |               |                          |               |                 |        |             |              |               |              |                      |              |
| Exploited biodiversity   | -0.157        | 0.231         | <b>-0.645</b> | <b>-0.197</b> | <b>-0.379</b> | <b>-0.529</b> | <b>0.819</b>     | <b>0.567</b>  | <b>-0.918</b>   | <b>-0.883</b> |                        |               |                          |               |                 |        |             |              |               |              |                      |              |
| Jeopardized biodiversity | 0.274         | <b>0.770</b>  | -0.313        | <b>-0.651</b> | <b>-0.855</b> | <b>-0.913</b> | <b>0.768</b>     | <b>0.792</b>  | <b>-0.684</b>   | <b>-0.591</b> | <b>0.724</b>           | <b>0.689</b>  |                          |               |                 |        |             |              |               |              |                      |              |
| Provisioning ES          | <b>0.374</b>  | 0.036         | <b>0.424</b>  | 0.031         | <b>-0.421</b> | 0.084         | 0.284            | -0.092        | 0.087           | <b>0.616</b>  | -0.098                 | <b>-0.593</b> | 0.233                    | -0.294        |                 |        |             |              |               |              |                      |              |
| Cultural ES              | <b>-0.757</b> | <b>0.496</b>  | <b>-0.483</b> | 0.240         | <b>0.556</b>  | <b>0.496</b>  | 0.285            | -0.028        | -0.235          | -0.313        | <b>0.336</b>           | 0.161         | -0.285                   | <b>-0.420</b> | <b>-0.334</b>   | -0.283 |             |              |               |              |                      |              |
| Regulating ES            | -0.089        | <b>0.385</b>  | 0.314         | <b>0.371</b>  | -0.154        | <b>0.385</b>  | 0.306            | <b>-0.349</b> | 0.053           | 0.149         | 0.102                  | -0.208        | 0.080                    | <b>-0.503</b> | <b>0.505</b>    | 0.217  | 0.024       | 0.299        |               |              |                      |              |
| Management Responses     | 0.009         | <b>0.907</b>  | <b>0.408</b>  | <b>0.589</b>  | <b>0.826</b>  | <b>0.907</b>  | <b>-0.793</b>    | <b>-0.694</b> | <b>0.653</b>    | <b>0.496</b>  | <b>-0.749</b>          | <b>-0.630</b> | <b>-0.932</b>            | <b>-0.953</b> | -0.116          | 0.256  | 0.142       | <b>0.549</b> | -0.125        | <b>0.488</b> |                      |              |
| Conservation Responses   | -0.277        | <b>0.910</b>  | 0.292         | <b>0.620</b>  | <b>0.874</b>  | <b>0.910</b>  | <b>-0.757</b>    | <b>-0.695</b> | <b>0.680</b>    | <b>0.408</b>  | <b>-0.715</b>          | <b>-0.540</b> | <b>-0.993</b>            | <b>-0.955</b> | -0.254          | 0.148  | 0.308       | <b>0.625</b> | -0.110        | <b>0.528</b> | <b>0.940</b>         | <b>0.977</b> |
